# Supplementary material
Source: Research Square preprint supplement (doi:10.21203/rs.3.rs-10017901/v1)
Supplement: Supplementary file 1 [file 219e7a0f972b1620bcb0f64d.xlsx]

## Sheet: Table S6
Table S6. DEGs between pupal alate and ergatoid queens with annotations. Supergene-located DEGs were shown in bold.
gene_id	length (bp)	logCPM	logFC	FDR	scaffold	Predicted genes	GOterm
Mnip_010848	11093	7.39821	-1.91137	3.38e-07	scaffold_77357	-	-
Mnip_010022	9326	9.3367	-1.6914	1.03e-06	scaffold_76968	-	-
Mnip_022011	3306	7.09708	-1.00603	5.61e-05	scaffold_77815	Succinate dehydrogenase iron-sulfur subunit, mitochondrial	GO:0005743; GO:0006099; GO:0006121; GO:0008177; GO:0009055; GO:0009060; GO:0022904; GO:0031966; GO:0045273; GO:0046872; GO:0048039; GO:0051537; GO:0051538; GO:0051539
Mnip_022106	1212	1.83291	3.02577	0.000663112	scaffold_77815	-	-
Mnip_022185	2506	5.82024	-1.32022	0.00500884	scaffold_77815	Epidermal growth factor-like protein	GO:0005615; GO:0032497; GO:0050829; GO:0140367
Mnip_022171	49014	0.457339	1.7548	0.00540406	scaffold_77815	-	-
Mnip_022240	2942	2.99552	1.01959	0.00838907	scaffold_77815	-	-
Mnip_022140	1703	2.572	-1.09174	0.00877124	scaffold_77815	-	-
Mnip_022072	507	2.22405	1.18643	0.00955209	scaffold_77815	-	-
Mnip_022119	41347	-0.756717	2.03116	0.030586	scaffold_77815	-	-
Mnip_011464	1177	5.7096	-2.54314	0.0406251	scaffold_77517	-	-
Mnip_011451	3023	2.21787	-1.94886	0.0443452	scaffold_77517	-	-
Mnip_016026	2619	8.56625	-13.3689	1.9e-13	scaffold_77668	Tropomyosin	-
Mnip_021932	390	8.30404	-9.6194	1.86e-10	scaffold_77784	-	-
Mnip_016818	666	3.5713	-5.1708	2.31e-09	scaffold_77673	-	-
Mnip_002841	1059	4.31787	5.57047	2.98e-09	scaffold_61421	-	-
Mnip_011530	9250	7.32016	-4.58696	2.98e-09	scaffold_77520	Protein-lysine N-methyltransferase SMYD4	GO:0005634; GO:0005737; GO:0007507; GO:0008168; GO:0008270; GO:0032259; GO:0042826
Mnip_006667	1066	3.16601	6.15068	1.8e-08	scaffold_72719	-	-
Mnip_016817	10825	8.65791	-3.53031	3.23e-08	scaffold_77673	PDZ and LIM domain protein Zasp	GO:0001725; GO:0001952; GO:0003779; GO:0005912; GO:0005915; GO:0005925; GO:0005927; GO:0015629; GO:0016323; GO:0030018; GO:0030036; GO:0030239; GO:0031252; GO:0031941; GO:0042805; GO:0045177; GO:0045178; GO:0046872; GO:0051371; GO:0061061
Mnip_013870	43433	4.75504	-2.95317	3.66e-08	scaffold_77638	Protein vestigial	GO:0001745; GO:0003677; GO:0003713; GO:0005634; GO:0006260; GO:0006357; GO:0007346; GO:0007451; GO:0007472; GO:0007473; GO:0007476; GO:0007480; GO:0007482; GO:0007525; GO:0016204; GO:0035220; GO:0042127; GO:0045944; GO:0048190; GO:0090254
Mnip_015086	2966	9.51092	-2.34525	3.66e-08	scaffold_77655	-	-
Mnip_015087	831	8.17963	-2.18871	3.66e-08	scaffold_77655	-	-
Mnip_021182	8670	7.05918	-2.56395	3.66e-08	scaffold_77743	-	-
Mnip_018830	10765	7.3345	-3.90393	3.91e-08	scaffold_77695	-	-
Mnip_005139	1511	3.35273	-4.07312	8.4e-08	scaffold_69543	-	-
Mnip_016027	1483	3.92314	-9.39754	8.4e-08	scaffold_77668	Tropomyosin	-
Mnip_004912	366	2.76629	5.91862	1.06e-07	scaffold_69099	-	-
Mnip_020907	2927	7.19715	-1.98253	1.06e-07	scaffold_77743	Probable isocitrate dehydrogenase] subunit alpha, mitochondrial	GO:0000287; GO:0004449; GO:0005739; GO:0005759; GO:0006099; GO:0006102; GO:0045242; GO:0051287
Mnip_019959	5506	5.92769	-1.32104	1.93e-07	scaffold_77711	Armadillo repeat-containing protein 6 homolog	GO:0002244; GO:0009653
Mnip_020714	1877	3.67679	-5.22974	1.93e-07	scaffold_77743	Sperm flagellar protein 1	GO:0001578; GO:0003341; GO:0005874; GO:0005902; GO:0005930; GO:0007026; GO:0008017; GO:0016323; GO:0016324; GO:0016477; GO:0030027; GO:0030032; GO:0030175; GO:0046847; GO:0051493; GO:0097542; GO:0097729; GO:1904158; GO:1990716; GO:2000095
Mnip_016815	3459	6.72863	-2.95168	2.51e-07	scaffold_77673	-	-
Mnip_000910	2151	2.1403	8.35213	3.26e-07	scaffold_38435	-	-
Mnip_018048	516	4.35198	-2.39129	3.65e-07	scaffold_77682	-	-
Mnip_020713	3812	5.30824	-1.61068	4e-07	scaffold_77743	Putative inorganic phosphate cotransporter	GO:0005315; GO:0006814; GO:0015293; GO:0016020; GO:0022857; GO:0035435
Mnip_021792	1080	10.3553	-4.64988	4.09e-07	scaffold_77779	-	-
Mnip_018087	1666	7.19712	-1.5299	4.26e-07	scaffold_77682	NADH dehydrogenase 1 alpha subcomplex subunit 10, mitochondrial	GO:0005737; GO:0005739; GO:0005743; GO:0005759; GO:0006120; GO:0045271
Mnip_017847	3037	5.58471	-1.4091	4.65e-07	scaffold_77681	Dihydrolipoyllysine-residue acetyltransferase component of pyruvate dehydrogenase complex, mitochondrial	GO:0004742; GO:0005739; GO:0005759; GO:0006006; GO:0006086; GO:0006099; GO:0016407; GO:0034604; GO:0042802; GO:0042867; GO:0043209; GO:0045254; GO:1902493
Mnip_019025	2626	8.0816	-1.64198	6.33e-07	scaffold_77697	Mitochondrial-processing peptidase subunit beta	GO:0004222; GO:0005739; GO:0005759; GO:0006627; GO:0046872
Mnip_016785	1382	11.4773	-2.7554	8.92e-07	scaffold_77672	Actin, muscle	GO:0005524; GO:0005737; GO:0005856; GO:0016787
Mnip_014541	6859	6.86933	-1.44258	9.02e-07	scaffold_77646	-	-
Mnip_015851	9417	7.4184	-1.42697	9.67e-07	scaffold_77667	NADH dehydrogenase iron-sulfur protein 2, mitochondrial	GO:0005739; GO:0005743; GO:0006120; GO:0008137; GO:0019826; GO:0022008; GO:0032981; GO:0042063; GO:0045271; GO:0046872; GO:0048038; GO:0051287; GO:0051539; GO:0061351; GO:0071453
Mnip_014624	2235	6.89803	-1.29509	1.03e-06	scaffold_77650	Neurochondrin homolog	GO:0003012; GO:0030425; GO:0031175; GO:0043025; GO:0048168
Mnip_019237	4626	6.28288	-1.15842	1.03e-06	scaffold_77697	Organellar oligopeptidase A, chloroplastic/mitochondrial	GO:0004222; GO:0005759; GO:0006508; GO:0009507; GO:0009536; GO:0009570; GO:0046872
Mnip_015411	2719	7.66331	-1.7285	1.12e-06	scaffold_77657	Cytochrome c1, heme protein, mitochondrial	GO:0005739; GO:0005743; GO:0006122; GO:0008121; GO:0020037; GO:0033762; GO:0045275; GO:0045333; GO:0046872
Mnip_022495	4692	6.76843	1.1147	1.3e-06	scaffold_77832	Transcription elongation factor SPT5	GO:0000122; GO:0000993; GO:0003682; GO:0003729; GO:0005700; GO:0005703; GO:0005705; GO:0006368; GO:0007549; GO:0008023; GO:0032044; GO:0032785; GO:0032786; GO:0044877; GO:0045944; GO:0046982; GO:0140673
Mnip_012265	807	4.41363	-1.61753	1.32e-06	scaffold_77595	Distal membrane arm assembly component 2	GO:0005739; GO:0032981
Mnip_013034	6275	5.93885	-1.49257	1.34e-06	scaffold_77616	Titin homolog	GO:0004674; GO:0005524; GO:0017022; GO:0031672; GO:0031674; GO:0031965; GO:0043005; GO:0046872; GO:0051015; GO:0106310
Mnip_014776	411	1.51326	-3.05874	1.34e-06	scaffold_77653	-	-
Mnip_017507	6961	8.85436	-1.51135	1.45e-06	scaffold_77680	-	-
Mnip_011818	32900	7.77172	-1.41244	1.47e-06	scaffold_77540	RING finger protein nhl-1	GO:0000209; GO:0004842; GO:0008270; GO:0016567; GO:0043161; GO:0061630
Mnip_014167	38812	9.32692	-1.83567	1.76e-06	scaffold_77640	Protein Obscurin	GO:0005085; GO:0005523; GO:0005524; GO:0007527; GO:0019901; GO:0031430; GO:0036309; GO:0045214
Mnip_015085	11215	8.65574	-2.48648	1.76e-06	scaffold_77655	-	-
Mnip_012812	1811	6.05	-1.56448	2.39e-06	scaffold_77604	-	-
Mnip_014000	3200	3.75017	-2.53244	3.08e-06	scaffold_77639	Proton-associated sugar transporter A	GO:0005356; GO:0008506; GO:0015517; GO:0015757; GO:0016020; GO:1904659
Mnip_017066	1936	6.8341	-1.61634	3.23e-06	scaffold_77674	Isocitrate dehydrogenase subunit gamma, mitochondrial	GO:0000287; GO:0005739; GO:0006099; GO:0006102; GO:0008047; GO:0016616; GO:0045242; GO:0051287
Mnip_014634	1967	6.81344	-1.40471	3.28e-06	scaffold_77650	Probable pyruvate dehydrogenase E1 component subunit alpha, mitochondrial	GO:0004739; GO:0005739; GO:0005759; GO:0006086; GO:0046872
Mnip_003794	351	1.68576	9.99411	3.34e-06	scaffold_65639	-	-
Mnip_001155	2260	7.08504	-1.34415	3.36e-06	scaffold_41153	Isocitrate dehydrogenase subunit beta, mitochondrial	GO:0000287; GO:0005739; GO:0006099; GO:0006102; GO:0016616; GO:0051287
Mnip_008573	2701	7.25162	-1.50194	3.36e-06	scaffold_75316	Dihydrolipoyl dehydrogenase, mitochondrial	GO:0004148; GO:0005634; GO:0005739; GO:0005759; GO:0006090; GO:0006103; GO:0006120; GO:0006508; GO:0007369; GO:0009083; GO:0031514; GO:0034604; GO:0042391; GO:0043159; GO:0045252; GO:0045254; GO:0047101; GO:0048240; GO:0050660; GO:0160157; GO:0160167; GO:1902493
Mnip_013698	12042	7.6831	-1.24007	3.42e-06	scaffold_77637	-	-
Mnip_014483	14584	7.33499	-1.25927	3.42e-06	scaffold_77646	Long-chain-fatty-acid--CoA ligase 1	GO:0000038; GO:0001676; GO:0004467; GO:0005524; GO:0005739; GO:0005741; GO:0005778; GO:0005783; GO:0005789; GO:0006633; GO:0007584; GO:0010747; GO:0019432; GO:0033211; GO:0034201; GO:0035338; GO:0042178; GO:0043539; GO:0043651; GO:0044539; GO:0047676; GO:0050197; GO:0070251; GO:0090433; GO:0090434; GO:0120162
Mnip_003398	2016	4.7181	-2.07406	3.43e-06	scaffold_63566	-	-
Mnip_008511	9693	2.75171	5.91938	3.67e-06	scaffold_75278	-	-
Mnip_012053	2060	6.84694	-1.70549	3.67e-06	scaffold_77552	Dihydrolipoyllysine-residue acetyltransferase component of pyruvate dehydrogenase complex, mitochondrial	GO:0004742; GO:0005739; GO:0005759; GO:0006006; GO:0006086; GO:0006099; GO:0042802; GO:0042867; GO:0045254
Mnip_011913	2373	8.13931	-1.44037	3.9e-06	scaffold_77549	Cytochrome b-c1 complex subunit 2, mitochondrial	GO:0004222; GO:0005654; GO:0005739; GO:0005743; GO:0006119; GO:0006122; GO:0006508; GO:0009060; GO:0045275; GO:0045333; GO:0046872
Mnip_014990	3357	6.76435	-1.13721	3.9e-06	scaffold_77655	Fumarate hydratase, mitochondrial	GO:0000050; GO:0000821; GO:0004333; GO:0005634; GO:0005694; GO:0005739; GO:0005759; GO:0005829; GO:0006099; GO:0006106; GO:0006108; GO:0006281; GO:0006525; GO:0006974; GO:0048873; GO:0120162; GO:2001034
Mnip_017908	1852	6.69371	-1.3341	4.26e-06	scaffold_77681	NADH dehydrogenase 1 alpha subcomplex subunit 9, mitochondrial	GO:0003954; GO:0005743; GO:0005759; GO:0007623; GO:0044877; GO:0045271
Mnip_010402	3373	5.73769	-1.25632	4.4e-06	scaffold_77182	Trimeric intracellular cation channel type 1B.1	GO:0005267; GO:0005789; GO:0042802
Mnip_010457	4774	6.97768	-1.22691	4.4e-06	scaffold_77242	Mitochondrial inner membrane m-AAA protease component AFG3L2	GO:0004176; GO:0004222; GO:0005524; GO:0005739; GO:0005743; GO:0005745; GO:0006508; GO:0007409; GO:0007528; GO:0008053; GO:0008237; GO:0008270; GO:0016485; GO:0016540; GO:0016887; GO:0021675; GO:0030163; GO:0033619; GO:0034982; GO:0036444; GO:0040014; GO:0042407; GO:0042552; GO:0051082; GO:0051560; GO:0051604; GO:0055001; GO:0060013; GO:0072753; GO:0110097; GO:0141164
Mnip_015620	998	7.07482	-1.27111	4.4e-06	scaffold_77665	Prohibitin 1	GO:0005739; GO:0005743; GO:0007005; GO:0035632; GO:0071456
Mnip_017056	665	5.22051	-1.32498	4.49e-06	scaffold_77674	Small ribosomal subunit protein mS34	GO:0003735; GO:0005739; GO:0005743; GO:0005763; GO:0032543
Mnip_015888	1958	7.87283	-1.38153	5.08e-06	scaffold_77667	NADH dehydrogenase flavoprotein 1, mitochondrial	GO:0005743; GO:0006120; GO:0008137; GO:0010181; GO:0045271; GO:0046872; GO:0051287; GO:0051539
Mnip_014708	32113	5.51863	-1.06766	5.45e-06	scaffold_77650	Kinesin-like protein KIF16B	GO:0001704; GO:0001919; GO:0005524; GO:0005547; GO:0005737; GO:0005768; GO:0005769; GO:0005819; GO:0005829; GO:0005871; GO:0005874; GO:0006895; GO:0007173; GO:0007492; GO:0008017; GO:0008543; GO:0008574; GO:0016887; GO:0031901; GO:0032266; GO:0032801; GO:0043325; GO:0045022; GO:0047496; GO:0080025
Mnip_020980	2539	7.72216	-1.24367	5.45e-06	scaffold_77743	Voltage-dependent anion-selective channel	GO:0005739; GO:0005741; GO:0006811; GO:0007005; GO:0007291; GO:0007602; GO:0008308; GO:0015288; GO:0016006; GO:0030382; GO:0043066; GO:0046930; GO:0110099; GO:1990542
Mnip_014159	1799	7.6775	-1.11976	5.84e-06	scaffold_77640	Pentatricopeptide repeat-containing protein 2, mitochondrial	GO:0005739; GO:0006397; GO:0007005; GO:0050684
Mnip_019754	2111	4.71373	-1.21176	6.29e-06	scaffold_77704	Protoheme IX farnesyltransferase, mitochondrial	GO:0000266; GO:0002521; GO:0004311; GO:0005730; GO:0005739; GO:0005759; GO:0005829; GO:0006629; GO:0006784; GO:0007005; GO:0008495; GO:0008535; GO:0009060; GO:0017004; GO:0031966; GO:0035264; GO:0048034; GO:0055070; GO:0070069
Mnip_014403	6523	4.28675	-1.94245	6.98e-06	scaffold_77644	Synaptic vesicle glycoprotein 2B	GO:0001504; GO:0001669; GO:0007268; GO:0008021; GO:0022857; GO:0030672; GO:0043195; GO:0098978; GO:0099509; GO:2000300
Mnip_018438	1192	7.48088	-1.56626	6.98e-06	scaffold_77689	Cytochrome c oxidase subunit 5A, mitochondrial	GO:0005743; GO:0006123; GO:0045277; GO:0046872
Mnip_008481	3978	1.25965	3.38534	7.33e-06	scaffold_75238	-	-
Mnip_019802	3214	7.43665	-1.29105	8.08e-06	scaffold_77704	Complement component 1 Q subcomponent-binding protein, mitochondrial	GO:0000122; GO:0001849; GO:0003714; GO:0003729; GO:0004857; GO:0005540; GO:0005576; GO:0005634; GO:0005730; GO:0005737; GO:0005759; GO:0005886; GO:0006397; GO:0006915; GO:0006958; GO:0006974; GO:0008380; GO:0009986; GO:0030449; GO:0030984; GO:0031690; GO:0032689; GO:0032695; GO:0039534; GO:0039536; GO:0042256; GO:0043065; GO:0043491; GO:0045087; GO:0045785; GO:0048025; GO:0050687; GO:0051897; GO:…
Mnip_012133	1868	5.14932	-1.46128	8.15e-06	scaffold_77579	Pyruvate dehydrogenase E1 component subunit beta, mitochondrial	GO:0004739; GO:0005739; GO:0005759; GO:0006086; GO:0045254; GO:0046872
Mnip_007995	1368	1.62277	9.93192	8.63e-06	scaffold_74671	-	-
Mnip_014546	30053	7.68183	-1.7784	8.63e-06	scaffold_77646	-	-
Mnip_016822	15607	7.46747	-1.47576	8.63e-06	scaffold_77673	2-oxoglutarate dehydrogenase complex component E1	GO:0004591; GO:0005634; GO:0005739; GO:0005759; GO:0006091; GO:0006096; GO:0006099; GO:0006103; GO:0006104; GO:0030976; GO:0031966; GO:0045252; GO:0046872
Mnip_012520	43077	8.39487	-1.01807	9.06e-06	scaffold_77598	Unconventional myosin-XVIIIa	GO:0000139; GO:0003677; GO:0003723; GO:0005524; GO:0005737; GO:0005793; GO:0005802; GO:0005815; GO:0006259; GO:0007030; GO:0008094; GO:0009986; GO:0016020; GO:0016460; GO:0016477; GO:0031032; GO:0032982; GO:0042641; GO:0043030; GO:0043066; GO:0043531; GO:0048194; GO:0050714; GO:0051015; GO:0090161; GO:0090164; GO:1903028
Mnip_017749	1287	7.86766	-1.49609	9.06e-06	scaffold_77681	Cytochrome b-c1 complex subunit Rieske, mitochondrial	GO:0005743; GO:0008121; GO:0046872; GO:0051537
Mnip_011159	1196	6.22781	-1.21026	9.06e-06	scaffold_77442	NADH dehydrogenase iron-sulfur protein 7, mitochondrial	GO:0005743; GO:0006120; GO:0008137; GO:0009060; GO:0015990; GO:0032981; GO:0045271; GO:0046872; GO:0048038; GO:0051539
Mnip_003901	2128	1.46776	9.76715	9.17e-06	scaffold_66016	-	-
Mnip_011731	2895	9.67097	-1.4395	9.17e-06	scaffold_77540	ATP synthase subunit alpha, mitochondrial	GO:0005524; GO:0005739; GO:0005743; GO:0015986; GO:0019915; GO:0022900; GO:0043531; GO:0045259; GO:0046933
Mnip_012047	2293	7.61742	-1.21325	9.98e-06	scaffold_77552	ATP synthase subunit b, mitochondrial	GO:0005739; GO:0005743; GO:0015078; GO:0015986; GO:0045259; GO:1902600
Mnip_002883	7272	4.8913	7.73069	1.05e-05	scaffold_61596	RNA-directed DNA polymerase from mobile element jockey	GO:0003964
Mnip_017379	1878	3.62843	-2.53765	1.05e-05	scaffold_77680	Major facilitator superfamily domain-containing protein 12	GO:0005764; GO:0005765; GO:0005770; GO:0005886; GO:0008643; GO:0015293; GO:0033162; GO:0033229; GO:0042438; GO:0042470; GO:0043474; GO:0048021; GO:0048022; GO:1903712
Mnip_000934	1241	2.41943	6.4786	1.16e-05	scaffold_38769	-	-
Mnip_013253	4079	7.7516	-1.07654	1.16e-05	scaffold_77628	NADH-ubiquinone oxidoreductase 75 kDa subunit, mitochondrial	GO:0005739; GO:0005743; GO:0005758; GO:0006120; GO:0008137; GO:0009055; GO:0009060; GO:0032981; GO:0042776; GO:0043209; GO:0045271; GO:0046872; GO:0051537; GO:0051539
Mnip_014381	2316	6.28066	-1.0331	1.19e-05	scaffold_77644	Uncharacterized protein C6orf136	-
Mnip_012638	1091	6.92201	-1.51347	1.2e-05	scaffold_77599	ATP synthase subunit O, mitochondrial	GO:0005739; GO:0005743; GO:0042776; GO:0045259; GO:0046933; GO:1902600
Mnip_019200	2366	6.29117	-1.37629	1.21e-05	scaffold_77697	Mitochondrial inner membrane protein OXA1L	GO:0005739; GO:0005743; GO:0005759; GO:0009060; GO:0031966; GO:0032543; GO:0032780; GO:0032977; GO:0032979; GO:0032981; GO:0032991; GO:0033615; GO:0042803; GO:0051262; GO:0051354; GO:0097177; GO:0141164
Mnip_000484	580	6.25407	-1.18918	1.36e-05	scaffold_118	-	-
Mnip_000491	6356	8.62242	-1.16143	1.43e-05	scaffold_118	Desumoylating isopeptidase 1	GO:0005634; GO:0005829; GO:0006508; GO:0006611; GO:0008474; GO:0016926; GO:0016929; GO:0032434; GO:0032991; GO:0042802; GO:0052816; GO:0061676
Mnip_008323	1602	3.53873	2.32973	1.49e-05	scaffold_75073	Glucose dehydrogenase [FAD, quinone]	GO:0005576; GO:0050660; GO:0140762
Mnip_008800	28008	10.1721	-2.05455	1.5e-05	scaffold_75591	Troponin I	GO:0000280; GO:0003779; GO:0005861; GO:0005865; GO:0006936; GO:0007399; GO:0007507; GO:0007517; GO:0007527; GO:0030239; GO:0045214; GO:0046716; GO:0048738; GO:0060047
Mnip_021430	2258	4.99775	-1.03595	1.54e-05	scaffold_77746	Mitochondrial import inner membrane translocase subunit TIM44	GO:0001650; GO:0005524; GO:0005739; GO:0005743; GO:0005744; GO:0005759; GO:0030150; GO:0051087
Mnip_002708	1649	4.01911	-1.31764	1.65e-05	scaffold_60968	Retinol dehydrogenase 13	GO:0005739; GO:0005743; GO:0009644; GO:0010842; GO:0042462; GO:0042574; GO:0052650
Mnip_015132	1495	6.71187	-1.10922	1.65e-05	scaffold_77656	Phosphoglycerate mutase 1	GO:0004082; GO:0004619; GO:0005829; GO:0006094; GO:0016787; GO:0019901; GO:0061621
Mnip_022471	3863	7.87567	-1.10341	1.65e-05	scaffold_77832	Heat shock 70 kDa protein cognate 5	GO:0001405; GO:0005524; GO:0005737; GO:0005739; GO:0005759; GO:0007005; GO:0008566; GO:0010918; GO:0016226; GO:0016887; GO:0030150; GO:0030234; GO:0031072; GO:0042026; GO:0044183; GO:0044571; GO:0051082; GO:0051085; GO:0140662
Mnip_010014	42452	11.4499	-1.68829	1.69e-05	scaffold_76962	Myosin regulatory light chain 2	GO:0005509; GO:0016459
Mnip_018462	2288	3.46117	-1.43831	1.7e-05	scaffold_77689	Sarcoplasmic calcium-binding protein 1	GO:0005509
Mnip_014180	1019	5.67674	-1.26188	1.73e-05	scaffold_77640	Acyl carrier protein, mitochondrial	GO:0000035; GO:0000036; GO:0005198; GO:0005739; GO:0005743; GO:0006120; GO:0044571; GO:0045271; GO:0099128
Mnip_004294	1130	1.47839	9.78386	1.76e-05	scaffold_67122	-	-
Mnip_001919	1946	5.87772	-1.04197	1.85e-05	scaffold_55051	Phosphoglycerate kinase	GO:0004618; GO:0005524; GO:0005829; GO:0006094; GO:0006096; GO:0007268; GO:0030018; GO:0031430; GO:0043531; GO:0045202; GO:0046716; GO:0046872; GO:0061621
Mnip_021878	984	6.13206	-1.42557	1.86e-05	scaffold_77779	Cytochrome b-c1 complex subunit 6, mitochondrial	GO:0005739; GO:0005743; GO:0006122; GO:0008121; GO:0045275; GO:0045333
Mnip_002701	1571	8.5262	-1.46467	2.14e-05	scaffold_60955	ATP synthase F(0) complex subunit C1, mitochondrial	GO:0008289; GO:0015252; GO:0015986; GO:0031966; GO:0033177; GO:0045259; GO:1902600
Mnip_004268	676	6.60101	-1.36635	2.14e-05	scaffold_66980	ATP synthase F(1) complex subunit delta, mitochondrial	GO:0005198; GO:0005739; GO:0005740; GO:0005743; GO:0009060; GO:0015078; GO:0033615; GO:0042776; GO:0045259; GO:0046933; GO:1902600
Mnip_009779	33134	7.96386	-1.17932	2.14e-05	scaffold_76750	Clustered mitochondria protein homolog	GO:0003729; GO:0005737; GO:0007005; GO:0048312
Mnip_011293	1878	5.9439	-1.08914	2.25e-05	scaffold_77487	Complex I assembly factor ACAD9, mitochondrial	GO:0001676; GO:0004466; GO:0005634; GO:0005739; GO:0005743; GO:0030425; GO:0032981; GO:0046395; GO:0050660; GO:0051791; GO:0070991
Mnip_015996	930	3.45311	-1.06932	2.26e-05	scaffold_77668	-	-
Mnip_006832	630	1.88899	10.2081	2.35e-05	scaffold_73019	-	-
Mnip_013924	1096	8.954	-1.21388	2.35e-05	scaffold_77639	ATP synthase F(1) complex catalytic subunit beta, mitochondrial	GO:0005524; GO:0005739; GO:0005743; GO:0015986; GO:0042776; GO:0045259; GO:0046933
Mnip_016006	1446	5.09997	-1.07689	2.35e-05	scaffold_77668	Small ribosomal subunit protein mS27	GO:0000049; GO:0005739; GO:0005743; GO:0005763; GO:0006417; GO:0008283; GO:0019843; GO:0032543
Mnip_016620	4107	6.06866	-1.52877	2.48e-05	scaffold_77672	-	-
Mnip_016064	7665	5.24652	-1.28772	2.62e-05	scaffold_77668	Protein-lysine N-methyltransferase SMYD4	GO:0005634; GO:0005737; GO:0007507; GO:0008168; GO:0008270; GO:0032259
Mnip_019387	1251	4.55544	-1.08056	2.62e-05	scaffold_77702	sn-1-specific diacylglycerol lipase ABHD11	GO:0005739; GO:0005759; GO:0016298; GO:0045252
Mnip_017585	16281	5.3251	-1.67031	2.76e-05	scaffold_77680	Zeta-sarcoglycan	GO:0005737; GO:0005856; GO:0005886; GO:0016012; GO:0042383; GO:0061024
Mnip_019691	1108	8.06371	-1.42502	2.85e-05	scaffold_77704	ATP synthase subunit gamma, mitochondrial	GO:0005739; GO:0005743; GO:0015986; GO:0045259; GO:0046933
Mnip_013033	34557	9.53398	-1.34319	2.87e-05	scaffold_77616	SEC14 domain and spectrin repeat-containing protein 1	GO:0048514
Mnip_015257	6345	8.16588	-1.01705	3.07e-05	scaffold_77656	Oxaloacetate tautomerase FAHD2A, mitochondrial	GO:0005739; GO:0006107; GO:0046872; GO:0050163
Mnip_016134	44995	12.8297	-1.7037	3.07e-05	scaffold_77668	Myosin heavy chain, muscle	GO:0000146; GO:0005516; GO:0005524; GO:0005703; GO:0005737; GO:0005863; GO:0006936; GO:0007298; GO:0007427; GO:0007517; GO:0007527; GO:0008307; GO:0016460; GO:0030017; GO:0030239; GO:0031033; GO:0031672; GO:0032982; GO:0040011; GO:0042692; GO:0042803; GO:0043520; GO:0045214; GO:0050821; GO:0051015; GO:0060361; GO:0071689
Mnip_020247	2180	0.275758	4.46528	3.11e-05	scaffold_77723	-	-
Mnip_018717	12855	7.53003	-2.96973	3.12e-05	scaffold_77695	-	-
Mnip_012422	756	4.75318	-1.0798	3.18e-05	scaffold_77597	Cx9C motif-containing protein 4	GO:0005758
Mnip_011421	8836	1.70628	7.46034	3.18e-05	scaffold_77506	Putative nuclease HARBI1	GO:0004518; GO:0005634; GO:0005737; GO:0046872
Mnip_013923	1867	8.12341	-1.25484	3.2e-05	scaffold_77639	ATP synthase subunit beta, mitochondrial	GO:0005524; GO:0005739; GO:0005743; GO:0015986; GO:0016887; GO:0042776; GO:0045259; GO:0046933
Mnip_001551	1377	2.48842	-1.64573	3.3e-05	scaffold_47228	Titin	GO:0000794; GO:0002020; GO:0003009; GO:0003300; GO:0004672; GO:0004674; GO:0004713; GO:0005509; GO:0005516; GO:0005524; GO:0005576; GO:0005829; GO:0005865; GO:0006936; GO:0006941; GO:0007076; GO:0008307; GO:0010628; GO:0010737; GO:0019887; GO:0019899; GO:0019901; GO:0030018; GO:0030049; GO:0030240; GO:0030241; GO:0031430; GO:0031433; GO:0031674; GO:0035995; GO:0042802; GO:0042803; GO:0042805; GO:…
Mnip_011409	1689	5.70205	-1.305	3.3e-05	scaffold_77488	Pseudouridylate synthase RPUSD4, mitochondrial	GO:0000049; GO:0005654; GO:0005739; GO:0005759; GO:0006397; GO:0008380; GO:0031118; GO:0035770; GO:0070131; GO:0070902; GO:0106029; GO:1990400; GO:1990481
Mnip_012146	656	7.76611	-1.28477	3.3e-05	scaffold_77579	Cytochrome c oxidase subunit 4 isoform 1, mitochondrial	GO:0005743; GO:0006123; GO:0045277
Mnip_018276	3752	5.98676	-1.01709	3.42e-05	scaffold_77687	Glycerol-3-phosphate dehydrogenase, mitochondrial	GO:0004368; GO:0005509; GO:0005739; GO:0005743; GO:0006072; GO:0006094; GO:0006127; GO:0019563; GO:0035264; GO:0043010
Mnip_016910	824	6.06896	-1.34422	4.02e-05	scaffold_77673	-	-
Mnip_011590	1090	4.95429	-1.21217	4.07e-05	scaffold_77526	Small ribosomal subunit protein uS7m	GO:0000028; GO:0003729; GO:0003735; GO:0005763; GO:0005840; GO:0006412; GO:0019843; GO:0032543
Mnip_021403	6903	6.70696	-1.38019	4.12e-05	scaffold_77746	Phytanoyl-CoA dioxygenase	GO:0006631; GO:0031418; GO:0046872; GO:0048244
Mnip_002257	1410	3.90009	12.2499	4.45e-05	scaffold_57464	Protein ANTAGONIST OF LIKE HETEROCHROMATIN PROTEIN 1	GO:0003682; GO:0004518; GO:0005634; GO:0035098; GO:0035102; GO:0040029; GO:0046872
Mnip_015197	1780	3.72429	-1.28474	4.47e-05	scaffold_77656	Peptide deformylase, mitochondrial	GO:0005739; GO:0006412; GO:0008284; GO:0042586; GO:0043687; GO:0046872
Mnip_014651	5585	3.88356	-1.27562	4.49e-05	scaffold_77650	-	-
Mnip_014656	11759	4.70499	-1.27961	4.51e-05	scaffold_77650	Homeobox protein TGIF1	GO:0000122; GO:0000978; GO:0001227; GO:0001843; GO:0003682; GO:0005634; GO:0005654; GO:0007368; GO:0008283; GO:0008285; GO:0008432; GO:0009410; GO:0009953; GO:0010470; GO:0010629; GO:0030182; GO:0035881; GO:0038092; GO:0048144; GO:0048146; GO:0048387; GO:0060041; GO:0070410; GO:0071363; GO:1902871
Mnip_015859	34748	5.04914	-1.06635	4.59e-05	scaffold_77667	Protein-lysine N-methyltransferase SMYD4	GO:0005634; GO:0005737; GO:0007507; GO:0008168; GO:0008270; GO:0032259; GO:0042826
Mnip_010009	8031	7.26615	-1.0317	4.74e-05	scaffold_76962	Solute carrier family 25 member 3	GO:0005315; GO:0005739; GO:0005743; GO:0015317; GO:0043209; GO:0044877; GO:1990547
Mnip_000575	982	4.20459	-1.49421	4.84e-05	scaffold_28745	Holocytochrome c-type synthase	GO:0004408; GO:0005739; GO:0005743; GO:0005829; GO:0020037; GO:0046872
Mnip_013350	5796	7.26828	-1.19568	4.95e-05	scaffold_77628	Glutamate receptor ionotropic, kainate 2	GO:0000149; GO:0001662; GO:0004970; GO:0005234; GO:0005886; GO:0006874; GO:0007215; GO:0007268; GO:0015277; GO:0019228; GO:0022849; GO:0030165; GO:0031624; GO:0031625; GO:0032839; GO:0032983; GO:0035249; GO:0042734; GO:0042802; GO:0043113; GO:0043195; GO:0043204; GO:0043524; GO:0043525; GO:0046328; GO:0048169; GO:0048172; GO:0050804; GO:0050806; GO:0051402; GO:0051967; GO:0060080; GO:0097110; GO:…
Mnip_019921	1985	4.99871	-1.52988	5.48e-05	scaffold_77711	SET domain-containing protein SmydA-8, isoform B	GO:0000785; GO:0005634; GO:0008170; GO:0008276; GO:0008757; GO:0010629; GO:0032259; GO:0042826
Mnip_021646	1130	4.67815	-1.23386	5.82e-05	scaffold_77750	ATP synthase mitochondrial F1 complex assembly factor 1	GO:0005739; GO:0005743; GO:0033615; GO:0140777
Mnip_005932	1371	7.10211	-1.36903	6.02e-05	scaffold_71189	NADH dehydrogenase flavoprotein 2, mitochondrial	GO:0005739; GO:0005743; GO:0006120; GO:0008137; GO:0045271; GO:0046872; GO:0051537
Mnip_020775	1232	5.21999	-1.29955	6.08e-05	scaffold_77743	-	-
Mnip_016342	1943	5.58602	-1.20575	6.68e-05	scaffold_77670	Cytochrome b-c1 complex subunit 7	GO:0005739; GO:0005743; GO:0006122; GO:0045275; GO:0045333
Mnip_018831	801	0.561449	-3.36413	6.84e-05	scaffold_77695	Flightin	GO:0005863; GO:0007527; GO:0008307; GO:0014703; GO:0031672; GO:0045214; GO:0071688; GO:0097493
Mnip_009303	1860	1.89854	4.50107	7.07e-05	scaffold_76138	-	-
Mnip_017399	1242	3.74808	-1.12982	7.12e-05	scaffold_77680	Ubiquinone biosynthesis O-methyltransferase, mitochondrial	GO:0005739; GO:0005743; GO:0005759; GO:0006071; GO:0006744; GO:0008171; GO:0010420; GO:0031314; GO:0032259; GO:0061542; GO:0110142; GO:0120537
Mnip_003480	1010	4.5468	-1.03842	7.15e-05	scaffold_64266	Complex I intermediate-associated protein 30, mitochondrial	GO:0001666; GO:0005739; GO:0006120; GO:0009408; GO:0032981; GO:0042594; GO:0051082; GO:0055093; GO:1990204
Mnip_010972	5361	1.6958	10.011	7.15e-05	scaffold_77401	RNA-directed DNA polymerase from mobile element jockey	GO:0003964
Mnip_021181	333	1.58009	-2.06125	7.15e-05	scaffold_77743	-	-
Mnip_014183	14179	4.29644	-1.05959	7.18e-05	scaffold_77640	ATP-binding cassette sub-family C member Sur	GO:0001666; GO:0005524; GO:0016020; GO:0016887; GO:0042626; GO:0055085; GO:0140359
Mnip_012993	596	5.76966	-1.59103	7.27e-05	scaffold_77609	Cytochrome c	GO:0005758; GO:0009055; GO:0020037; GO:0046872
Mnip_019492	6039	8.34403	-1.1024	7.42e-05	scaffold_77702	-	-
Mnip_014204	544	2.11456	-1.17485	7.87e-05	scaffold_77640	-	-
Mnip_010991	8937	6.97468	-1.59236	8.25e-05	scaffold_77408	Succinate dehydrogenase [ubiquinone] flavoprotein subunit, mitochondrial	GO:0005730; GO:0005739; GO:0005743; GO:0005759; GO:0006099; GO:0006105; GO:0006121; GO:0007399; GO:0008177; GO:0009055; GO:0022904; GO:0042776; GO:0045273; GO:0050660
Mnip_015797	30216	6.11828	-1.18525	8.56e-05	scaffold_77667	Junctophilin-3	GO:0005783; GO:0005789; GO:0005886; GO:0007612; GO:0007613; GO:0016020; GO:0030314; GO:0035640; GO:0040011; GO:0048168; GO:0050885; GO:0060314
Mnip_016823	15819	6.31377	-1.90035	8.69e-05	scaffold_77673	PDZ and LIM domain protein Zasp	GO:0001725; GO:0001952; GO:0003779; GO:0005912; GO:0005915; GO:0005925; GO:0005927; GO:0015629; GO:0016323; GO:0030018; GO:0030036; GO:0030239; GO:0031252; GO:0031941; GO:0042805; GO:0045177; GO:0045178; GO:0046872; GO:0051371; GO:0061061
Mnip_002649	706	6.05838	-1.31351	8.7e-05	scaffold_60393	ATP synthase-coupling factor 6, mitochondrial	GO:0005739; GO:0005743; GO:0015078; GO:0015986; GO:0045259; GO:1902600
Mnip_012937	3168	10.6749	-1.59719	8.82e-05	scaffold_77609	Myosin light chain alkali	GO:0005509; GO:0005829; GO:0005859; GO:0006936; GO:0007498; GO:0030234; GO:0032036; GO:0050790
Mnip_014471	310	6.3406	-1.13975	9.3e-05	scaffold_77646	Cytochrome c oxidase subunit 7C, mitochondrial	GO:0005739; GO:0005743; GO:0006123; GO:0045277
Mnip_017141	1696	6.67383	-1.17291	0.000100743	scaffold_77675	E3 ubiquitin-protein ligase TRIM45	GO:0005654; GO:0005829; GO:0008270; GO:0043161; GO:0045171; GO:0050728; GO:0060348; GO:0061630; GO:0070936
Mnip_012243	75056	3.57191	-1.10127	0.000104668	scaffold_77595	Fibroblast growth factor homolog	GO:0008083
Mnip_000479	1060	6.20025	-1.18783	0.000105097	scaffold_118	Succinate dehydrogenase cytochrome b560 subunit, mitochondrial	GO:0005743; GO:0006099; GO:0006121; GO:0009055; GO:0020037; GO:0045273; GO:0046872
Mnip_016155	1095	5.57766	-1.51386	0.000105097	scaffold_77669	Chaperone protein DnaJ	GO:0005524; GO:0005737; GO:0006260; GO:0008270; GO:0009408; GO:0031072; GO:0042026; GO:0051082; GO:0051085
Mnip_019643	772	4.91015	-1.37462	0.000106226	scaffold_77704	NADH dehydrogenase 1 alpha subcomplex subunit 5	GO:0005739; GO:0005743; GO:0022904; GO:0045271
Mnip_019761	1273	7.23473	-1.15018	0.000106226	scaffold_77704	NADH dehydrogenase (ubiquinone) 23 kDa subunit	GO:0005739; GO:0005743; GO:0006120; GO:0008137; GO:0032981; GO:0042775; GO:0045271; GO:0046872; GO:0051539
Mnip_014238	4858	5.83322	-1.30708	0.000109485	scaffold_77644	-	-
Mnip_019153	2590	2.74955	-1.31067	0.000115028	scaffold_77697	3'-5' exonuclease	GO:0003676; GO:0005634; GO:0008310; GO:0008311; GO:0008408; GO:0045950; GO:0046872
Mnip_006845	1115	6.29837	-1.25022	0.000115671	scaffold_73044	Succinate dehydrogenase] cytochrome b small subunit, mitochondrial	GO:0005743; GO:0006099; GO:0006121; GO:0020037; GO:0043495; GO:0045273; GO:0046872; GO:0048039
Mnip_014181	399	4.30328	-1.17526	0.000125473	scaffold_77640	-	-
Mnip_001407	501	1.79691	4.86148	0.000143386	scaffold_43274	-	-
Mnip_015256	1586	5.10545	-1.03499	0.000152816	scaffold_77656	Large ribosomal subunit protein bL35m	GO:0003735; GO:0005762; GO:0006412
Mnip_010720	13653	11.3929	-1.18321	0.000156431	scaffold_77319	Paramyosin, long form	GO:0000281; GO:0005737; GO:0005856; GO:0005863; GO:0007266; GO:0007498; GO:0016459; GO:0030239; GO:0030866; GO:0031032; GO:0031430; GO:0032956; GO:0048598; GO:0072518; GO:1901888
Mnip_004902	1223	5.97117	-1.30876	0.000158256	scaffold_69068	NADH dehydrogenase 1 alpha subcomplex subunit 8	GO:0005739; GO:0005743; GO:0005758; GO:0006120; GO:0045271
Mnip_009866	1010	3.59373	-1.03667	0.000158256	scaffold_76831	Mitochondrial import inner membrane translocase subunit Tim13	GO:0005743; GO:0005758; GO:0042719; GO:0045039; GO:0046872; GO:0140318
Mnip_005464	1529	4.76704	-1.0318	0.000175035	scaffold_70226	Large ribosomal subunit protein uL29m	GO:0003735; GO:0005739; GO:0005743; GO:0005762; GO:0032543
Mnip_013310	8688	6.73066	-1.00492	0.000175035	scaffold_77628	Pyruvate kinase	GO:0000287; GO:0004743; GO:0005524; GO:0005737; GO:0005739; GO:0005829; GO:0006090; GO:0006096; GO:0009744; GO:0016301; GO:0030955; GO:0042593; GO:0042866; GO:0043186; GO:0061621
Mnip_004024	2992	2.52081	10.8595	0.000195356	scaffold_66333	-	-
Mnip_002753	970	6.0631	-1.62596	0.000200078	scaffold_61094	-	-
Mnip_020967	675	5.86474	-1.17367	0.000200078	scaffold_77743	NADH dehydrogenase 1 alpha subcomplex subunit 13	GO:0005524; GO:0005654; GO:0005737; GO:0005739; GO:0005743; GO:0009060; GO:0031966; GO:0032981; GO:0035458; GO:0042776; GO:0045039; GO:0045271; GO:0045732; GO:0045892; GO:0061133; GO:0071300; GO:0097191; GO:0098803; GO:1900119
Mnip_015051	515	4.72328	-1.29532	0.000204319	scaffold_77655	NADH dehydrogenase 1 alpha subcomplex subunit 2	GO:0001835; GO:0005743; GO:0045271
Mnip_018533	15049	5.76191	-1.69048	0.000205401	scaffold_77689	Homeotic protein spalt-major	GO:0000381; GO:0000981; GO:0001751; GO:0003677; GO:0005634; GO:0006355; GO:0006357; GO:0007423; GO:0007424; GO:0007438; GO:0007525; GO:0007605; GO:0008270; GO:0008584; GO:0008586; GO:0021782; GO:0030539; GO:0035155; GO:0035202; GO:0035277; GO:0035310; GO:0042659; GO:0045465; GO:0045466; GO:0048098; GO:0048644
Mnip_018764	23250	4.44401	-1.08045	0.000205401	scaffold_77695	Poly(ADP-ribose) glycohydrolase 1	GO:0004649; GO:0005975; GO:0006282; GO:0006970; GO:0006974; GO:0006979; GO:0009414; GO:0048511; GO:0050832; GO:0090332
Mnip_019424	3329	4.06631	-1.08786	0.000208842	scaffold_77702	Protein-lysine N-methyltransferase SMYD4	GO:0005634; GO:0005737; GO:0007507; GO:0008168; GO:0008270; GO:0032259
Mnip_015574	12583	5.86048	-1.28591	0.000214986	scaffold_77665	Proton-coupled amino acid transporter 2	GO:0005280; GO:0005297; GO:0005789; GO:0005886; GO:0015180; GO:0015187; GO:0015193; GO:0015808; GO:0015816; GO:0015824; GO:0055038; GO:1902600
Mnip_005324	927	8.23766	-1.35981	0.000226963	scaffold_69969	-	-
Mnip_022721	1027	6.77625	-1.22655	0.000240764	scaffold_83060	ATP synthase subunit d, mitochondrial	GO:0005739; GO:0005743; GO:0006979; GO:0008340; GO:0015078; GO:0015986; GO:0032007; GO:0045259; GO:0046034; GO:0051881; GO:0070373; GO:1902600
Mnip_005901	10751	0.803768	6.9832	0.000247913	scaffold_71123	BEN domain-containing protein 5	GO:0003677; GO:0005794; GO:0045892
Mnip_021444	2381	4.95912	-1.09935	0.000247913	scaffold_77746	MICOS complex subunit MIC27	GO:0042407; GO:0061617
Mnip_003855	606	2.27535	-2.35299	0.000253648	scaffold_65863	-	-
Mnip_010257	6004	7.3644	-1.99186	0.000259209	scaffold_77100	Dihydrolipoyllysine-residue succinyltransferase component of 2-oxoglutarate dehydrogenase complex, mitochondrial	GO:0004149; GO:0005634; GO:0005739; GO:0005759; GO:0006099; GO:0006103; GO:0006104; GO:0016746; GO:0033512; GO:0045252
Mnip_013557	607	7.18737	-1.08347	0.000259209	scaffold_77629	NADH dehydrogenase 1 beta subcomplex subunit 5, mitochondrial	GO:0005654; GO:0005739; GO:0005743; GO:0045271
Mnip_022722	1027	6.78241	-1.22858	0.000259209	scaffold_83061	ATP synthase subunit d, mitochondrial	GO:0005739; GO:0005743; GO:0006979; GO:0008340; GO:0015078; GO:0015986; GO:0032007; GO:0045259; GO:0046034; GO:0051881; GO:0070373; GO:1902600
Mnip_007282	4220	5.96643	-1.21901	0.000262136	scaffold_73637	-	-
Mnip_007386	873	1.63655	9.95966	0.000276077	scaffold_73806	-	-
Mnip_010260	8754	7.77936	-1.05807	0.000276077	scaffold_77100	Dihydrolipoyllysine-residue succinyltransferase component of 2-oxoglutarate dehydrogenase complex, mitochondrial	GO:0004149; GO:0005634; GO:0005739; GO:0005759; GO:0006099; GO:0006103; GO:0006104; GO:0006734; GO:0016746; GO:0031072; GO:0033512; GO:0045252; GO:0051087; GO:0160167
Mnip_010285	1903	5.24208	-1.03388	0.000276077	scaffold_77123	Large ribosomal subunit protein mL39	GO:0000166; GO:0003735; GO:0005739; GO:0005762; GO:0006417; GO:0031047; GO:0032543
Mnip_015811	901	7.75907	-1.30712	0.000279821	scaffold_77667	Cytochrome c oxidase subunit 5B, mitochondrial	GO:0004129; GO:0005739; GO:0005743; GO:0006123; GO:0031966; GO:0043434; GO:0045277; GO:0046872; GO:0097066
Mnip_022816	730	6.75694	-1.02804	0.000279821	scaffold_85442	Cytochrome c oxidase subunit NDUFA4	GO:0005739; GO:0005743; GO:0044877; GO:0045271; GO:0045277
Mnip_014622	1169	3.79527	-1.05511	0.000283951	scaffold_77650	DNA repair protein RAD51 homolog 1	GO:0000150; GO:0000152; GO:0000228; GO:0000722; GO:0000724; GO:0000730; GO:0000781; GO:0000785; GO:0000793; GO:0000794; GO:0000800; GO:0001673; GO:0003682; GO:0003690; GO:0003697; GO:0005524; GO:0005634; GO:0005654; GO:0005730; GO:0005737; GO:0005739; GO:0005759; GO:0005813; GO:0005829; GO:0006281; GO:0006310; GO:0006312; GO:0006974; GO:0007131; GO:0008094; GO:0009410; GO:0009636; GO:0010165; GO:…
Mnip_010747	6790	9.41307	-1.31835	0.000287177	scaffold_77340	Troponin C, isoallergen Bla g 6.0301	GO:0005509; GO:0016460
Mnip_000513	7605	3.39451	3.73007	0.000292572	scaffold_118	Carotenoid isomerooxygenase	GO:0003834; GO:0004497; GO:0007602; GO:0007603; GO:0007604; GO:0009110; GO:0010436; GO:0016063; GO:0016119; GO:0016121; GO:0035238; GO:0042572; GO:0042574; GO:0046872; GO:0106422
Mnip_021818	27326	8.023	-1.10703	0.000306606	scaffold_77779	-	-
Mnip_012585	11268	7.20179	-1.59675	0.000306898	scaffold_77598	GAS2-like protein pickled eggs	GO:0001578; GO:0005737; GO:0005856; GO:0005938; GO:0008017; GO:0016255; GO:0030707; GO:0030713; GO:0031110; GO:0045746; GO:0051015; GO:0051764; GO:1904825
Mnip_005880	18675	9.39275	-1.17026	0.00030728	scaffold_71106	Twitchin	GO:0004674; GO:0005516; GO:0005524; GO:0008344; GO:0019901; GO:0031430; GO:0031672; GO:0035095; GO:0040017; GO:0045214; GO:0045989; GO:0046872; GO:0051782; GO:0060298; GO:0106310
Mnip_004745	2860	2.2698	10.604	0.000327872	scaffold_68367	-	-
Mnip_007385	2832	1.88814	10.2185	0.000327872	scaffold_73806	120.7 kDa protein in NOF-FB transposable element	GO:0005634
Mnip_021973	1061	5.4778	-1.27905	0.000327872	scaffold_77803	-	-
Mnip_022808	730	6.71253	-1.0234	0.000327872	scaffold_85441	Cytochrome c oxidase subunit NDUFA4	GO:0005739; GO:0005743; GO:0044877; GO:0045271; GO:0045277
Mnip_015850	4360	2.0273	-1.84873	0.000333871	scaffold_77667	-	-
Mnip_004026	391	-0.742547	5.95019	0.00034253	scaffold_66335	-	-
Mnip_016074	815	6.08485	-1.19453	0.000346038	scaffold_77668	-	-
Mnip_008137	2463	2.60892	-6.06949	0.000354278	scaffold_74834	-	-
Mnip_005833	779	5.47585	-1.05829	0.000388886	scaffold_71031	Mitochondrial import inner membrane translocase subunit Tim17-B	GO:0005739; GO:0005743; GO:0005744; GO:0008320; GO:0030150
Mnip_002686	1802	0.243814	-2.94661	0.000423578	scaffold_60841	Alpha-tocopherol transfer protein-like	GO:0016020; GO:1902936
Mnip_013162	634	5.7866	-1.26341	0.000426243	scaffold_77626	Putative ATP synthase subunit f, mitochondrial	GO:0005739; GO:0031966; GO:0042776; GO:0045259; GO:1902600
Mnip_001967	327	1.98573	10.3186	0.000441452	scaffold_55220	-	-
Mnip_013213	564	5.72143	-1.13857	0.000441452	scaffold_77626	NADH dehydrogenase 1 beta subcomplex subunit 2, mitochondrial	GO:0005743; GO:0032981; GO:0045271
Mnip_003944	1781	-0.613721	7.52368	0.000453279	scaffold_66136	-	-
Mnip_011817	28543	2.07529	-1.64719	0.000479504	scaffold_77540	-	-
Mnip_021435	1015	5.386	-1.01835	0.000485002	scaffold_77746	-	-
Mnip_012588	1426	4.93288	-1.71392	0.000497803	scaffold_77598	GAS2-like protein pickled eggs	GO:0001578; GO:0005737; GO:0005856; GO:0005938; GO:0008017; GO:0016255; GO:0030707; GO:0030713; GO:0031110; GO:0045746; GO:0051015; GO:0051764; GO:1904825
Mnip_019114	957	4.32242	-1.13719	0.00052149	scaffold_77697	Rhodanese domain-containing protein CG4456	-
Mnip_022515	2804	2.10471	-1.29722	0.000524461	scaffold_77832	-	-
Mnip_019183	4578	8.66319	-1.11283	0.00054435	scaffold_77697	Aconitate hydratase, mitochondrial	GO:0003994; GO:0005506; GO:0005739; GO:0006099; GO:0006101; GO:0043209; GO:0051539
Mnip_009870	5674	2.0796	-1.30843	0.000605526	scaffold_76831	Venom acid phosphatase Acph-1	GO:0003993; GO:0005576
Mnip_000985	4812	-0.413703	7.75086	0.00065515	scaffold_39514	Transposon Ty3-G Gag-Pol polyprotein	GO:0003677; GO:0003723; GO:0003887; GO:0003964; GO:0004190; GO:0004523; GO:0005524; GO:0005634; GO:0005737; GO:0006310; GO:0006508; GO:0008270; GO:0015074; GO:0075523
Mnip_009384	6441	2.6191	-4.82539	0.000713929	scaffold_76231	-	-
Mnip_004780	5554	-0.130826	4.00227	0.000714916	scaffold_68493	Retrovirus-related Pol polyprotein from transposon 17.6	GO:0003676; GO:0003964; GO:0004190; GO:0004519; GO:0006508; GO:0015074; GO:0042575
Mnip_018828	845	5.38648	-1.12515	0.000770678	scaffold_77695	NADH dehydrogenase 1 beta subcomplex subunit 3	GO:0005739; GO:0005743; GO:0022900; GO:0032981; GO:0045271
Mnip_016062	2424	5.6305	-1.09072	0.000785754	scaffold_77668	Aquaporin AQPAn.G	GO:0005886; GO:0015267
Mnip_016630	6036	2.91516	-2.02307	0.000785754	scaffold_77672	-	-
Mnip_004023	3662	2.24719	10.5828	0.000786732	scaffold_66333	-	-
Mnip_014646	3384	3.46681	-1.30099	0.000792084	scaffold_77650	Fatty-acid amide hydrolase 2	GO:0005811; GO:0016020; GO:0016042; GO:0017064; GO:0019369
Mnip_009759	2475	1.36391	-1.74049	0.000834617	scaffold_76738	-	-
Mnip_016816	24685	6.86489	-1.06514	0.000842665	scaffold_77673	PDZ and LIM domain protein Zasp	GO:0001725; GO:0001952; GO:0003779; GO:0005912; GO:0005915; GO:0005925; GO:0005927; GO:0015629; GO:0016323; GO:0030018; GO:0030036; GO:0030239; GO:0031252; GO:0031941; GO:0042805; GO:0045177; GO:0045178; GO:0046872; GO:0051371; GO:0061061
Mnip_000567	341	3.10452	-1.09458	0.000894555	scaffold_28200	Small integral membrane protein 8	GO:0016020
Mnip_011412	565	-0.610412	7.51966	0.0009055	scaffold_77488	DEAD-box helicase Dbp80	GO:0003724; GO:0003729; GO:0005524; GO:0005634; GO:0005654; GO:0010468; GO:0010494; GO:0016887; GO:0016973; GO:0044614
Mnip_013120	2680	8.80549	-2.31098	0.000933666	scaffold_77626	Hexamerin 70c	GO:0005576; GO:0005634; GO:0005737; GO:0045735
Mnip_016598	1177	7.5473	-1.30006	0.000966001	scaffold_77672	-	-
Mnip_001217	1286	2.18776	10.5278	0.000966178	scaffold_41770	Protein ANTAGONIST OF LIKE HETEROCHROMATIN PROTEIN 1	GO:0003682; GO:0004518; GO:0005634; GO:0035098; GO:0035102; GO:0040029; GO:0046872
Mnip_017388	8892	8.4349	-1.44768	0.00100354	scaffold_77680	-	-
Mnip_014384	758	2.76202	1.4753	0.00118078	scaffold_77644	-	-
Mnip_020223	1230	6.48834	-1.20456	0.00118078	scaffold_77717	-	-
Mnip_009302	2369	3.20694	3.96288	0.0011939	scaffold_76138	-	-
Mnip_007217	1499	-0.836858	5.12194	0.00122235	scaffold_73550	-	-
Mnip_009385	3960	-0.580909	-4.12354	0.0012394	scaffold_76231	-	-
Mnip_018162	1627	2.23664	-1.49214	0.00143625	scaffold_77687	-	-
Mnip_000668	2443	4.81933	-1.68541	0.00144761	scaffold_33911	Queuine tRNA-ribosyltransferase catalytic subunit	GO:0008479; GO:0032473; GO:0046872; GO:0101030; GO:0120507
Mnip_008052	1424	1.08219	9.36033	0.00150229	scaffold_74733	-	-
Mnip_003611	2736	5.66671	-3.8123	0.00155661	scaffold_65060	Retrovirus-related Pol polyprotein from type-2 retrotransposable element R2DM	GO:0003964; GO:0004190; GO:0004519; GO:0006508; GO:0008270
Mnip_001515	452	-0.621773	2.66649	0.00156972	scaffold_46355	Choline dehydrogenase, mitochondrial	GO:0005743; GO:0008812; GO:0019285; GO:0050660
Mnip_007413	7193	0.492166	3.01453	0.00162426	scaffold_73834	Probable RNA-directed DNA polymerase from transposon X-element	GO:0003964; GO:0006313
Mnip_018047	27694	7.67713	-1.07289	0.00165148	scaffold_77682	Calcium-transporting ATPase sarcoplasmic/endoplasmic reticulum type	GO:0005388; GO:0005524; GO:0006874; GO:0016020; GO:0016887; GO:0033017; GO:0046872; GO:0070588
Mnip_006239	1709	0.842996	3.42682	0.00171623	scaffold_71877	Transposable element P transposase	GO:0003693; GO:0004803; GO:0006313; GO:0008270; GO:0015074; GO:0016740
Mnip_004066	806	-1.05647	6.99175	0.00186573	scaffold_66401	-	-
Mnip_010256	601	3.89407	-1.21619	0.00200855	scaffold_77100	Dihydrolipoyllysine-residue succinyltransferase component of 2-oxoglutarate dehydrogenase complex, mitochondrial	GO:0004149; GO:0005634; GO:0005739; GO:0005759; GO:0006099; GO:0006103; GO:0006104; GO:0033512; GO:0045252
Mnip_015470	8527	0.736003	1.68519	0.00242345	scaffold_77657	Rhodopsin	GO:0005502; GO:0005886; GO:0007186; GO:0007601; GO:0008020; GO:0016020; GO:0016038; GO:0016056; GO:0042622; GO:0046872; GO:0060342; GO:0097381
Mnip_015261	3794	4.65144	1.80773	0.00264337	scaffold_77656	Proclotting enzyme	GO:0004252; GO:0005576; GO:0008236; GO:0016485; GO:0030133; GO:0042381; GO:0046872
Mnip_019397	4598	10.4752	-1.08317	0.00264337	scaffold_77702	Troponin T, skeletal muscle	GO:0005509; GO:0005523; GO:0005861; GO:0005865; GO:0006874; GO:0006936; GO:0007005; GO:0007498; GO:0010882; GO:0030239; GO:0045214; GO:0046716; GO:0048644; GO:0071689
Mnip_003786	1073	1.23849	9.5542	0.00274607	scaffold_65605	Protein ALP1-like	GO:0000118; GO:0004518; GO:0046872
Mnip_018945	34150	9.59626	-1.11055	0.00274607	scaffold_77697	Tropomyosin	-
Mnip_018335	3061	4.69094	-1.00281	0.00290954	scaffold_77687	FAD-dependent oxidoreductase domain-containing protein 1	GO:0005737; GO:0005743; GO:0016491; GO:0032981
Mnip_001292	179	4.27037	-1.06474	0.0029974	scaffold_42502	NADH dehydrogenase 1 alpha subcomplex subunit 7	GO:0005739; GO:0005743; GO:0006120; GO:0016491; GO:0042773; GO:0045271
Mnip_006389	7122	0.0998169	4.66663	0.0029974	scaffold_72273	-	-
Mnip_007509	1592	-0.654462	3.97846	0.0029974	scaffold_73928	-	-
Mnip_022653	1851	-0.741254	7.3555	0.00300149	scaffold_80526	Cytochrome P450 4C1	GO:0005506; GO:0005789; GO:0016712; GO:0020037
Mnip_008393	958	-0.176901	-3.85219	0.00329718	scaffold_75150	KRAB-A domain-containing protein 2	GO:0003676; GO:0006355; GO:0015074
Mnip_002164	631	2.05676	-1.26064	0.00333875	scaffold_56420	Glutamate receptor-interacting protein 1	GO:0000145; GO:0005102; GO:0005789; GO:0005874; GO:0005886; GO:0007399; GO:0008104; GO:0014069; GO:0021987; GO:0030165; GO:0030425; GO:0035255; GO:0042734; GO:0043005; GO:0043025; GO:0043083; GO:0043195; GO:0043197; GO:0043198; GO:0043204; GO:0044326; GO:0044327; GO:0045121; GO:0045211; GO:0048471; GO:0048786; GO:0050775; GO:0051020; GO:0055037; GO:0097060; GO:0098793; GO:0098794; GO:0098887; GO:…
Mnip_005881	1303	6.99814	-1.09819	0.0033567	scaffold_71106	Myosin light chain kinase, smooth muscle	GO:0001725; GO:0004687; GO:0005516; GO:0005524; GO:0005737; GO:0005829; GO:0014820; GO:0030027; GO:0032154; GO:0046872
Mnip_013255	1878	1.28305	-1.4025	0.003384	scaffold_77628	1-acyl-sn-glycerol-3-phosphate acyltransferase alpha	GO:0001819; GO:0001961; GO:0003841; GO:0005783; GO:0005789; GO:0006644; GO:0006654; GO:0016020; GO:0016024
Mnip_021162	19197	9.17952	-1.01282	0.00341483	scaffold_77743	Alpha-actinin, sarcomeric	GO:0003779; GO:0005509; GO:0005886; GO:0005925; GO:0030018; GO:0030036; GO:0030054; GO:0030864; GO:0042995; GO:0045214; GO:0051015; GO:0051017; GO:0055001
Mnip_001216	1771	1.54847	9.8665	0.0038606	scaffold_41770	-	-
Mnip_005052	3550	2.03809	1.15445	0.00404321	scaffold_69337	Protein furry	GO:0000902; GO:0005737; GO:0005938; GO:0007476; GO:0008407; GO:0030424; GO:0030425; GO:0030427; GO:0031175; GO:0035316; GO:0035317; GO:0042052; GO:0044297; GO:0045177; GO:0045860; GO:0045893; GO:0048601; GO:0048800; GO:0048814; GO:0050773; GO:0051012; GO:0070593; GO:0071902; GO:0150013
Mnip_012419	1066	4.4112	-1.12524	0.0040854	scaffold_77597	MICOS complex subunit Mic10	GO:0005739; GO:0042407; GO:0061617
Mnip_012641	2240	2.62438	-1.08751	0.00419675	scaffold_77599	-	-
Mnip_003255	464	-0.225358	7.98167	0.00437451	scaffold_62629	-	-
Mnip_005355	2223	2.10756	1.85787	0.00475721	scaffold_70019	Putative nuclease HARBI1	GO:0004518; GO:0005634; GO:0005737; GO:0046872
Mnip_004746	731	0.237835	8.49069	0.00497835	scaffold_68367	-	-
Mnip_016168	2289	2.81545	-1.10983	0.00505711	scaffold_77669	-	-
Mnip_019852	2529	2.60824	5.82763	0.00507854	scaffold_77705	-	-
Mnip_019458	1656	2.4885	4.83305	0.00547007	scaffold_77702	Chymotrypsin-1	GO:0004252; GO:0005576; GO:0006508
Mnip_004224	3009	-0.241501	7.96544	0.00548581	scaffold_66795	-	-
Mnip_005205	1279	4.03881	1.51216	0.00548581	scaffold_69662	Protein ALP1-like	GO:0000118; GO:0004518; GO:0046872
Mnip_012925	1851	3.64828	1.2958	0.00568313	scaffold_77609	-	-
Mnip_005826	981	2.81198	2.16402	0.00593695	scaffold_71025	Chymotrypsin-1	GO:0004252; GO:0005576; GO:0006508
Mnip_009921	1071	1.25818	1.84218	0.00610722	scaffold_76901	Inhibitor of growth protein 3	GO:0000812; GO:0006338; GO:0008270; GO:0032777; GO:0035064; GO:0035267
Mnip_002680	3620	2.44531	3.25843	0.00671076	scaffold_60742	-	-
Mnip_022496	4245	0.895077	1.7589	0.00672458	scaffold_77832	-	-
Mnip_009412	1276	1.29141	1.45044	0.00676986	scaffold_76264	-	-
Mnip_010910	643	3.1264	-1.18741	0.00677956	scaffold_77372	Mitochondrial import inner membrane translocase subunit Tim16	GO:0002168; GO:0005744; GO:0030150
Mnip_000589	1590	4.84787	1.06454	0.00774999	scaffold_31260	Anoctamin-8	GO:0005886
Mnip_009472	3124	0.0912521	-3.98644	0.00785585	scaffold_76323	-	-
Mnip_020548	544	4.67004	-1.01193	0.00785585	scaffold_77739	-	-
Mnip_015798	5083	2.04119	-1.10991	0.00789008	scaffold_77667	Cytochrome b5	GO:0005789; GO:0006805; GO:0006979; GO:0012505; GO:0016020; GO:0020037; GO:0043231; GO:0046872
Mnip_004729	5467	5.87166	1.78184	0.00807341	scaffold_68349	Phosphoinositide 3-kinase regulatory subunit 4	GO:0000425; GO:0004672; GO:0004674; GO:0005524; GO:0005770; GO:0005776; GO:0005829; GO:0005929; GO:0005930; GO:0006468; GO:0006622; GO:0006623; GO:0010506; GO:0015630; GO:0016020; GO:0016241; GO:0030670; GO:0032465; GO:0032801; GO:0034271; GO:0034272; GO:0035032; GO:0036064; GO:0036092; GO:0042149; GO:0043231; GO:0043491; GO:0045022; GO:0045171; GO:0045324; GO:0071561; GO:0097352; GO:0106310
Mnip_009709	965	-1.13491	6.88953	0.00856296	scaffold_76685	-	-
Mnip_005537	1522	0.984408	-1.38743	0.00908747	scaffold_70455	MFS-type transporter clz9	GO:0003676; GO:0005886; GO:0022857
Mnip_002850	1387	0.951954	-2.02447	0.00910894	scaffold_61436	Bumetanide-sensitive sodium-(potassium)-chloride cotransporter	GO:0006884; GO:0008511; GO:0016020; GO:0055064; GO:0055075; GO:0055078; GO:1990573
Mnip_022933	1080	0.44029	2.97605	0.00916126	scaffold_88216	-	-
Mnip_001571	535	1.65147	-1.05028	0.0092795	scaffold_47483	Glutamate receptor-interacting protein 1	GO:0000145; GO:0005102; GO:0005789; GO:0005874; GO:0005886; GO:0007399; GO:0008104; GO:0014069; GO:0021987; GO:0030165; GO:0030425; GO:0035255; GO:0042734; GO:0043005; GO:0043025; GO:0043083; GO:0043195; GO:0043197; GO:0043198; GO:0043204; GO:0044326; GO:0044327; GO:0045121; GO:0045211; GO:0048471; GO:0048786; GO:0050775; GO:0051020; GO:0055037; GO:0097060; GO:0098793; GO:0098794; GO:0098887; GO:…
Mnip_017099	6370	1.75981	-1.09228	0.00930238	scaffold_77674	Cytochrome P450 6k1	GO:0004497; GO:0005506; GO:0005789; GO:0016705; GO:0020037
Mnip_008658	5814	-0.49151	4.36928	0.009655	scaffold_75412	RNA-directed DNA polymerase from mobile element jockey	GO:0003964
Mnip_003621	4098	-1.0197	7.05174	0.00996568	scaffold_65100	-	-
Mnip_008660	3454	0.0421901	2.73485	0.00996568	scaffold_75413	-	-
Mnip_011628	1190	3.15497	1.68085	0.0100515	scaffold_77529	-	-
Mnip_014094	324	0.713662	1.15459	0.0114919	scaffold_77640	-	-
Mnip_007592	793	2.14379	10.4506	0.0115971	scaffold_74134	Zinc finger BED domain-containing protein 4	GO:0000785; GO:0000976; GO:0000977; GO:0000981; GO:0001228; GO:0001917; GO:0003723; GO:0005634; GO:0005654; GO:0005737; GO:0008270; GO:0042802; GO:0045944; GO:0046983
Mnip_019068	524	5.44892	-1.14055	0.011726	scaffold_77697	-	-
Mnip_019851	2277	2.96224	4.58636	0.0120656	scaffold_77705	-	-
Mnip_003746	373	0.930478	5.36106	0.0122452	scaffold_65477	-	-
Mnip_007591	1386	1.67767	9.97953	0.0122452	scaffold_74134	-	-
Mnip_001683	5286	-0.157605	-2.2745	0.0127523	scaffold_48104	-	-
Mnip_017834	1948	2.14731	1.1384	0.0127971	scaffold_77681	Zinc metalloproteinase nas-8	GO:0004222; GO:0005576; GO:0006508; GO:0008270
Mnip_007593	1451	1.27425	9.55046	0.0141061	scaffold_74134	-	-
Mnip_015491	1637	4.18532	1.10325	0.0141663	scaffold_77657	-	-
Mnip_005221	2878	0.122888	2.87963	0.0146646	scaffold_69701	-	-
Mnip_002633	3998	1.06949	1.00201	0.0153873	scaffold_59549	Limbic system-associated membrane protein	GO:0005576; GO:0005829; GO:0005886; GO:0007155; GO:0007399; GO:0098552
Mnip_004935	4649	1.36231	3.64279	0.0155083	scaffold_69137	RNA-directed DNA polymerase from mobile element jockey	GO:0003964
Mnip_002258	1903	0.0400782	8.2944	0.0163598	scaffold_57464	-	-
Mnip_004030	300	4.28681	-1.0513	0.0171987	scaffold_66338	-	-
Mnip_007503	5237	0.448688	1.55035	0.0172241	scaffold_73921	Transposon Tf2-12 polyprotein	GO:0003677; GO:0003723; GO:0003887; GO:0003964; GO:0004190; GO:0004519; GO:0005634; GO:0006310; GO:0006508; GO:0015074; GO:0046872
Mnip_010587	3940	4.4578	1.00432	0.0174173	scaffold_77277	Ribonucleoside-diphosphate reductase large subunit	GO:0000731; GO:0004748; GO:0005524; GO:0005635; GO:0005739; GO:0005829; GO:0005971; GO:0006206; GO:0006264; GO:0006281; GO:0008584; GO:0009185; GO:0009263; GO:0009265; GO:0010212; GO:0010971; GO:0021846; GO:0034451; GO:0036064; GO:0042802; GO:0043025; GO:0051290; GO:0060041; GO:0061731; GO:0070318; GO:0097718; GO:1900087
Mnip_014754	2183	3.65478	2.5984	0.0179056	scaffold_77653	-	-
Mnip_015499	2675	2.86678	1.39527	0.0183088	scaffold_77657	-	-
Mnip_007497	1406	5.05792	-2.41798	0.0183651	scaffold_73918	Trypsin-1	GO:0004252; GO:0005576; GO:0006508; GO:0007586; GO:0046872
Mnip_002848	3413	2.3925	-1.21443	0.01848	scaffold_61436	Solute carrier family 12 member 2	GO:0005886; GO:0006811; GO:0006883; GO:0006884; GO:0006972; GO:0007214; GO:0008511; GO:0008519; GO:0009925; GO:0010818; GO:0015079; GO:0015377; GO:0016020; GO:0016323; GO:0016324; GO:0016328; GO:0019901; GO:0030007; GO:0030321; GO:0030644; GO:0030659; GO:0031253; GO:0035633; GO:0035725; GO:0035865; GO:0042995; GO:0043005; GO:0043025; GO:0044297; GO:0044298; GO:0045795; GO:0046873; GO:0051087; GO:…
Mnip_022634	2253	1.73249	-2.85912	0.0192502	scaffold_79897	-	-
Mnip_002259	4142	4.97784	-2.2717	0.0196904	scaffold_57465	Retrovirus-related Pol polyprotein from transposon 17.6	GO:0003676; GO:0003964; GO:0004190; GO:0004519; GO:0006508; GO:0015074; GO:0042575
Mnip_022383	10547	-0.533261	2.24306	0.0200094	scaffold_77818	Retrovirus-related Pol polyprotein from transposon 17.6	GO:0003676; GO:0003964; GO:0004190; GO:0004519; GO:0006508; GO:0015074; GO:0042575
Mnip_015355	1025	2.91722	-4.95485	0.0203581	scaffold_77657	-	-
Mnip_006334	1901	-0.670307	-2.89313	0.0208371	scaffold_72165	Dynein axonemal intermediate chain 7	GO:0005930; GO:0008017; GO:0048487
Mnip_015668	1403	1.42057	1.53286	0.0214968	scaffold_77665	Endocuticle structural glycoprotein SgAbd-8	GO:0008010; GO:0062129
Mnip_008184	264	-0.602746	2.52461	0.0223538	scaffold_74917	-	-
Mnip_022631	2328	1.54626	-2.7476	0.0229433	scaffold_79895	-	-
Mnip_018426	3664	0.754121	-2.1319	0.0232745	scaffold_77689	Venom acid phosphatase Acph-1	GO:0003993; GO:0005576
Mnip_001866	973	2.69909	1.89756	0.0233668	scaffold_54693	Protein GAMETOPHYTE DEFECTIVE 1	GO:0005634; GO:0005730; GO:0005739; GO:0006364; GO:0008033; GO:0016787
Mnip_015342	1977	2.11383	1.78732	0.0237757	scaffold_77657	-	-
Mnip_020380	1529	0.182393	1.64418	0.0237757	scaffold_77734	-	-
Mnip_011187	7021	1.25965	1.33923	0.0244291	scaffold_77442	-	-
Mnip_021404	3749	6.49009	1.11692	0.0244291	scaffold_77746	-	-
Mnip_020260	13012	-0.163455	3.44437	0.0248008	scaffold_77734	Fatty acid synthase	GO:0003697; GO:0004312; GO:0004313; GO:0004314; GO:0004315; GO:0004316; GO:0005737; GO:0006089; GO:0006633; GO:0016297; GO:0019171; GO:0031177; GO:0032100; GO:0141148
Mnip_014778	3421	5.65967	1.2093	0.0252618	scaffold_77653	Carboxylic ester hydrolase	GO:0005576; GO:0016042; GO:0052689
Mnip_011945	1877	2.84655	-1.61145	0.0256321	scaffold_77550	Very long chain fatty acid elongase AAEL008004	GO:0005789; GO:0009922; GO:0019367; GO:0030148; GO:0034625; GO:0034626; GO:0042761
Mnip_004260	3058	-0.788181	7.34754	0.0262002	scaffold_66950	BEN domain-containing protein 5	GO:0003677; GO:0045892
Mnip_006916	2795	4.14083	1.64333	0.0262002	scaffold_73169	-	-
Mnip_022604	826	0.285227	-1.57534	0.027386	scaffold_78756	-	-
Mnip_003747	429	1.38178	4.40645	0.0274089	scaffold_65477	-	-
Mnip_009871	3839	5.17085	-1.2608	0.0282287	scaffold_76831	Venom acid phosphatase Acph-1	GO:0003993; GO:0005576
Mnip_021012	594	3.40756	1.12658	0.0286773	scaffold_77743	Protein lethal(2)essential for life	GO:0005634; GO:0005737; GO:0006446; GO:0009408; GO:0030018; GO:0042026; GO:0045214; GO:0048471; GO:0051082; GO:0061077
Mnip_017604	4068	3.95785	1.16357	0.0298063	scaffold_77680	Serine/threonine-protein kinase PLK4	GO:0004674; GO:0005524; GO:0005634; GO:0005737; GO:0005814; GO:0106310
Mnip_002585	928	-0.866227	-1.97429	0.0299819	scaffold_59358	Putative nuclease HARBI1	GO:0004518; GO:0005634; GO:0005737; GO:0046872
Mnip_002536	2268	-0.511516	3.02016	0.0306628	scaffold_59226	-	-
Mnip_020312	3708	8.8929	-1.73138	0.0314142	scaffold_77734	Hexamerin 110	GO:0005615; GO:0005634; GO:0005730; GO:0030139; GO:0045735
Mnip_011353	4439	0.690795	1.09569	0.0326036	scaffold_77488	Homeobox protein Nkx-3.2	GO:0000122; GO:0000978; GO:0001227; GO:0001501; GO:0005654; GO:0007368; GO:0031016; GO:0032331; GO:0042474; GO:0043066; GO:0048513; GO:0048536; GO:0048645; GO:0048705; GO:0048706; GO:0055123; GO:0060576
Mnip_002775	981	1.28638	1.33006	0.0331282	scaffold_61207	Lysosomal-trafficking regulator	GO:0002446; GO:0002456; GO:0005829; GO:0006644; GO:0006909; GO:0007017; GO:0007040; GO:0007596; GO:0009410; GO:0032438; GO:0032816; GO:0033299; GO:0033364; GO:0042742; GO:0042832; GO:0043473; GO:0048753; GO:0051607; GO:0055091; GO:0071621
Mnip_005347	2179	3.026	1.54803	0.0331337	scaffold_70005	Kinesin-like protein KLP2	GO:0005524; GO:0005634; GO:0005737; GO:0005876; GO:0007018; GO:0008017; GO:0008574; GO:0051231; GO:0051301; GO:0072686; GO:0090307
Mnip_008491	2260	-0.5327	-1.53705	0.0337953	scaffold_75250	MFS-type transporter clz9	GO:0003676; GO:0005886; GO:0022857
Mnip_021310	4263	-0.67951	7.45966	0.0341418	scaffold_77746	Gag-Pol polyprotein	GO:0003677; GO:0003723; GO:0003887; GO:0003964; GO:0004190; GO:0004523; GO:0006310; GO:0006508; GO:0015074; GO:0044826; GO:0046718; GO:0046872; GO:0075713
Mnip_002026	303	3.74708	-1.24102	0.0348935	scaffold_55648	-	-
Mnip_006917	3896	2.34415	1.36956	0.0348935	scaffold_73169	-	-
Mnip_006949	1279	-0.599239	-2.67811	0.0352275	scaffold_73226	-	-
Mnip_021405	321	1.49652	-1.03418	0.0352275	scaffold_77746	-	-
Mnip_002234	450	1.20283	1.08047	0.0352621	scaffold_57396	-	-
Mnip_013122	2741	11.5631	-1.88722	0.0352621	scaffold_77626	Hexamerin 70a	GO:0005576; GO:0005694; GO:0005730; GO:0005737; GO:0045735
Mnip_009735	2002	-0.698004	-2.91191	0.0359027	scaffold_76716	KRAB-A domain-containing protein 2	GO:0003676; GO:0006355; GO:0015074
Mnip_002114	160	2.38917	1.04779	0.0372733	scaffold_56100	-	-
Mnip_010544	343	0.77724	-1.05254	0.0380054	scaffold_77268	-	-
Mnip_019471	5834	6.7621	-1.04279	0.0402649	scaffold_77702	-	-
Mnip_002652	5457	0.697444	1.86157	0.040576	scaffold_60411	-	-
Mnip_021795	7520	0.705254	-2.09216	0.0412509	scaffold_77779	-	-
Mnip_002418	1365	3.95	2.10531	0.0415997	scaffold_58799	-	-
Mnip_011829	17289	6.79771	-1.42076	0.0421937	scaffold_77540	Serine protease filzig	GO:0004252; GO:0005886; GO:0006508; GO:0035149; GO:0060439; GO:0098595
Mnip_017626	1287	0.947438	-2.95387	0.042362	scaffold_77680	-	-
Mnip_001684	4077	-0.754926	2.02759	0.0441687	scaffold_48105	Transposon Tf2-12 polyprotein	GO:0003677; GO:0003723; GO:0003887; GO:0003964; GO:0004190; GO:0004519; GO:0005634; GO:0006310; GO:0006508; GO:0015074; GO:0046872
Mnip_007762	4211	-0.339897	1.33214	0.0441687	scaffold_74391	-	-
Mnip_008402	840	2.32079	2.8896	0.0448717	scaffold_75162	tRNA (guanine(6)-N(2))-methyltransferase THUMP3	GO:0000049; GO:0005730; GO:0005737; GO:0005829; GO:0030488; GO:0043527; GO:0160117; GO:0160118
Mnip_010477	2139	4.05212	-1.09796	0.0456978	scaffold_77245	Protein eyes shut	GO:0000902; GO:0005201; GO:0005509; GO:0005576; GO:0005615; GO:0009986; GO:0010378; GO:0016020; GO:0031012; GO:0042052; GO:0097730
Mnip_012171	40569	6.19337	-1.01593	0.0465336	scaffold_77579	Muscle M-line assembly protein unc-89	GO:0004672; GO:0005085; GO:0005524; GO:0008104; GO:0010628; GO:0014722; GO:0019902; GO:0030241; GO:0031034; GO:0031267; GO:0031430; GO:0031672; GO:0040017; GO:0045214; GO:0045989; GO:0060298; GO:0071688; GO:0090736; GO:1905552; GO:1905905
Mnip_010830	2927	0.128243	1.49365	0.0467478	scaffold_77351	-	-
Mnip_001263	1178	1.49085	-1.71414	0.0478008	scaffold_42407	Xanthine dehydrogenase 2	GO:0004854; GO:0005506; GO:0005886; GO:0046110; GO:0051537; GO:0071949
Mnip_010738	3372	-0.222749	-1.82849	0.0490947	scaffold_77321	-	-
Mnip_012040	1985	0.818195	-1.0227	0.049262	scaffold_77552	-	-
