# Supplementary material
Source: Research Square preprint supplement (doi:10.21203/rs.3.rs-10017901/v1)
Supplement: Supplementary file 2 [file 22f771495340c7b0f17baa10.xlsx]

## Sheet: Table S5
Table S5. DEGs between adult alate and ergatoid queens with annotations. Supergene-located DEGs are shown in bold, with enriched GO terms on supergene scaffolds indicated in red.
gene_id	length (bp)	logCPM	logFC	FDR	scaffold	Predicted genes	GOterm
Mnip_010864	1112	7.32184	1.21557	0.000245029	scaffold_77357	-	-
Mnip_022173	21443	5.52987	-2.08542	0.000352697	scaffold_77815	-	-
Mnip_022134	1532	3.66201	-1.14432	0.000469959	scaffold_77815	Glycolipid transfer protein	GO:0005829; GO:0008289; GO:0035627; GO:0051861; GO:0120009; GO:0120013; GO:1902387; GO:1902388
Mnip_022278	1768	0.861451	-3.7447	0.000636225	scaffold_77815	Dynein axonemal light chain 1	GO:0005737; GO:0005874; GO:0030286; GO:0036158; GO:0042995; GO:0043014; GO:0045504
Mnip_022266	29529	5.36042	1.13545	0.000879501	scaffold_77815	Calpain-C	GO:0005509; GO:0005737
Mnip_022230	1735	1.46088	1.49434	0.00184461	scaffold_77815	Dopaminechrome tautomerase	GO:0005576; GO:0006583; GO:0106417
Mnip_022174	333	0.134575	-2.49418	0.00315147	scaffold_77815	-	-
Mnip_022200	6986	7.08287	1.54102	0.00342866	scaffold_77815	-	-
Mnip_022106	1212	3.05435	1.45963	0.00381203	scaffold_77815	-	-
Mnip_022138	750	2.98176	-1.35654	0.0053601	scaffold_77815	-	-
Mnip_010029	381	5.34756	-1.09992	0.0064432	scaffold_76968	Histone H2B	GO:0000786; GO:0003677; GO:0005634; GO:0030527; GO:0044877; GO:0046982
Mnip_022194	3271	12.8507	-2.83838	0.00655415	scaffold_77815	ADP,ATP carrier protein 2	GO:0005471; GO:0005743; GO:0140021; GO:1901029; GO:1990544
Mnip_022135	942	1.59062	-1.26506	0.00674821	scaffold_77815	Transmembrane protein 17B	GO:0007224; GO:0035869; GO:0036038; GO:0060170; GO:0060271; GO:1905515
Mnip_022011	3306	8.62896	-1.2985	0.0095197	scaffold_77815	Succinate dehydrogenase] iron-sulfur subunit, mitochondrial	GO:0005743; GO:0006099; GO:0006121; GO:0008177; GO:0009055; GO:0009060; GO:0022904; GO:0031966; GO:0045273; GO:0046872; GO:0048039; GO:0051537; GO:0051538; GO:0051539
Mnip_022121	1964	4.8707	-1.05695	0.0114319	scaffold_77815	U11/U12 small nuclear ribonucleoprotein 48 kDa protein	GO:0005654; GO:0005689; GO:0005829; GO:0006397; GO:0008270; GO:0008380
Mnip_010033	372	0.770891	-1.64977	0.012184	scaffold_76968	Histone H2B	GO:0000786; GO:0003677; GO:0005634; GO:0030527; GO:0044877; GO:0046982
Mnip_022231	5579	0.402633	2.03198	0.0154339	scaffold_77815	-	-
Mnip_022272	10876	4.08807	1.30579	0.0167055	scaffold_77815	Glutamate receptor ionotropic, NMDA 2B	GO:0004972; GO:0005764; GO:0005770; GO:0005886; GO:0010043; GO:0017146; GO:0032026; GO:0035249; GO:0045211; GO:0046872; GO:0060079; GO:0060291; GO:0098839; GO:1904315
Mnip_022023	14016	7.73757	1.29026	0.0179593	scaffold_77815	Protein Skeletor, isoforms D/E	GO:0005198; GO:0005634; GO:0005700; GO:0005730; GO:0005737; GO:0005819; GO:0005874; GO:0006997; GO:0051225; GO:0051301; GO:0051321
Mnip_022137	691	0.528135	-2.25203	0.0202892	scaffold_77815	-	-
Mnip_022211	3157	4.57757	-1.19607	0.0203329	scaffold_77815	Lysozyme c-1	GO:0003796; GO:0031640; GO:0042742
Mnip_022053	1109	3.85805	-1.23954	0.0210191	scaffold_77815	Coenzyme Q-binding protein COQ10 homolog B, mitochondrial	GO:0005739; GO:0005743; GO:0045333; GO:0048039
Mnip_010863	15087	8.37278	1.34395	0.02206	scaffold_77357	-	-
Mnip_022227	4413	6.94946	1.6206	0.02299	scaffold_77815	Dopaminechrome tautomerase	GO:0005576; GO:0006583; GO:0106417
Mnip_022002	3950	1.35041	-2.59858	0.024198	scaffold_77815	-	-
Mnip_011429	2680	4.45922	-1.50789	0.0288616	scaffold_77517	SET domain-containing protein SmydA-8, isoform B	GO:0000785; GO:0005634; GO:0008170; GO:0008276; GO:0008757; GO:0010629; GO:0032259; GO:0042826
Mnip_022310	3101	2.57475	-1.5475	0.0299298	scaffold_77815	HEAT repeat-containing protein 5B	GO:0005654; GO:0005794; GO:0005829; GO:0015031; GO:0030136; GO:0048471
Mnip_022273	11533	2.73019	1.20701	0.0334772	scaffold_77815	Glutamate receptor ionotropic, NMDA 2B	GO:0001508; GO:0001662; GO:0001666; GO:0001701; GO:0001964; GO:0001967; GO:0001975; GO:0004970; GO:0004972; GO:0005102; GO:0005149; GO:0005234; GO:0005261; GO:0005262; GO:0005737; GO:0005764; GO:0005770; GO:0005789; GO:0005856; GO:0005886; GO:0006812; GO:0006816; GO:0006874; GO:0007268; GO:0007423; GO:0007611; GO:0007612; GO:0007613; GO:0007616; GO:0008013; GO:0008021; GO:0008270; GO:0008306; GO:…
Mnip_011445	4262	1.89807	2.60271	0.0356936	scaffold_77517	-	-
Mnip_022308	318	2.15639	-1.22937	0.0436836	scaffold_77815	-	-
Mnip_022238	2409	-0.581618	2.37165	0.0461136	scaffold_77815	Aminopeptidase N	GO:0005615; GO:0005737; GO:0005886; GO:0006508; GO:0008237; GO:0008270; GO:0016020; GO:0042277; GO:0042802; GO:0043171; GO:0070006; GO:0098552
Mnip_022229	3283	1.15999	1.2188	0.0468942	scaffold_77815	Dopaminechrome tautomerase	GO:0005576; GO:0006583; GO:0106417
Mnip_022271	887	1.32416	2.21467	0.0473767	scaffold_77815	Cyclin-H	GO:0000307; GO:0000439; GO:0001673; GO:0005634; GO:0005675; GO:0006357; GO:0006367; GO:0016301; GO:0016538; GO:0050821; GO:0070516; GO:0070985; GO:2000045
Mnip_004024	2992	2.45897	7.47898	3.81e-08	scaffold_66333	-	-
Mnip_021932	390	7.34805	-8.08996	3.81e-08	scaffold_77784	-	-
Mnip_003901	2128	1.61565	7.67226	4.27e-07	scaffold_66016	-	-
Mnip_006667	1066	3.06663	5.50438	4.27e-07	scaffold_72719	-	-
Mnip_011421	8836	1.80296	7.25578	4.27e-07	scaffold_77506	Putative nuclease HARBI1	GO:0004518; GO:0005634; GO:0005737; GO:0046872
Mnip_003520	567	7.17981	-6.78057	5.07e-07	scaffold_64677	PDZ and LIM domain protein Zasp	GO:0001725; GO:0001952; GO:0003779; GO:0005912; GO:0005915; GO:0005925; GO:0005927; GO:0015629; GO:0016323; GO:0030018; GO:0030036; GO:0030239; GO:0031252; GO:0031941; GO:0042805; GO:0045177; GO:0045178; GO:0046872; GO:0051371; GO:0061061
Mnip_003794	351	1.58632	5.64027	5.07e-07	scaffold_65639	-	-
Mnip_004294	1130	1.44776	7.16484	5.07e-07	scaffold_67122	-	-
Mnip_016960	4082	5.37726	-2.42227	6.37e-07	scaffold_77674	Zinc finger protein 423	GO:0005634; GO:0005694; GO:0006357; GO:0007399; GO:0008270; GO:0030154; GO:0043035
Mnip_010908	12516	5.40314	-2.52582	7.89e-07	scaffold_77372	Octopamine receptor Oamb	GO:0000122; GO:0004989; GO:0005886; GO:0006874; GO:0006979; GO:0007187; GO:0007200; GO:0007268; GO:0007612; GO:0008049; GO:0010841; GO:0016020; GO:0030425; GO:0030594; GO:0030728; GO:0042594; GO:0045202; GO:0060278; GO:0060279; GO:0090328; GO:1904068; GO:1905050
Mnip_002883	7272	4.55936	7.30889	8.04e-07	scaffold_61596	RNA-directed DNA polymerase from mobile element jockey	GO:0003964
Mnip_002841	1059	4.28749	5.22584	1.02e-06	scaffold_61421	-	-
Mnip_008511	9693	1.18389	6.59942	1.02e-06	scaffold_75278	-	-
Mnip_003703	2314	3.48095	8.16788	1.35e-06	scaffold_65362	Acyl-CoA Delta-9 desaturase	GO:0004768; GO:0005506; GO:0005789; GO:0006636
Mnip_009302	2369	2.89907	11.316	1.37e-06	scaffold_76138	-	-
Mnip_004912	366	2.7041	5.54551	1.48e-06	scaffold_69099	-	-
Mnip_018831	801	9.06762	-9.68679	6.7e-06	scaffold_77695	Flightin	GO:0005863; GO:0007527; GO:0008307; GO:0014703; GO:0031672; GO:0045214; GO:0071688; GO:0097493
Mnip_016815	3459	8.27293	-3.33871	7.26e-06	scaffold_77673	-	-
Mnip_001216	1771	1.58531	6.11957	8.2e-06	scaffold_41770	-	-
Mnip_007386	873	1.09278	7.5734	1.11e-05	scaffold_73806	-	-
Mnip_002257	1410	3.20533	11.6257	1.15e-05	scaffold_57464	Protein ANTAGONIST OF LIKE HETEROCHROMATIN PROTEIN 1	GO:0003682; GO:0004518; GO:0005634; GO:0035098; GO:0035102; GO:0040029; GO:0046872
Mnip_014865	7127	7.27107	-1.46348	1.93e-05	scaffold_77653	Voltage-dependent calcium channel subunit alpha-2/delta-4	GO:0005245; GO:0005891; GO:0046872; GO:0050908; GO:0070588
Mnip_013034	6275	6.6473	-1.60582	2.36e-05	scaffold_77616	Titin homolog	GO:0004674; GO:0005524; GO:0017022; GO:0031672; GO:0031674; GO:0031965; GO:0043005; GO:0046872; GO:0051015; GO:0106310
Mnip_009303	1860	1.31631	9.69953	2.8e-05	scaffold_76138	-	-
Mnip_008658	5814	0.740726	6.75888	3.45e-05	scaffold_75412	RNA-directed DNA polymerase from mobile element jockey	GO:0003964
Mnip_004023	3662	1.73174	10.1276	3.46e-05	scaffold_66333	-	-
Mnip_016959	7082	2.11498	-2.6581	4.19e-05	scaffold_77674	Zinc finger protein 521	GO:0000978; GO:0001228; GO:0005634; GO:0006357; GO:0008270; GO:0030154
Mnip_019643	772	6.49314	-1.80515	5.67e-05	scaffold_77704	NADH dehydrogenase] 1 alpha subcomplex subunit 5	GO:0005739; GO:0005743; GO:0022904; GO:0045271
Mnip_006832	630	1.12666	9.50105	5.69e-05	scaffold_73019	-	-
Mnip_004745	2860	2.19516	10.6019	5.97e-05	scaffold_68367	-	-
Mnip_007385	2832	1.49794	9.8863	5.97e-05	scaffold_73806	120.7 kDa protein in NOF-FB transposable element	GO:0005634
Mnip_019150	2462	11.4609	-4.27347	5.97e-05	scaffold_77697	Glycerol-3-phosphate dehydrogenase], cytoplasmic	GO:0005829; GO:0005975; GO:0006650; GO:0042803; GO:0046168; GO:0051287; GO:0141152
Mnip_019128	3531	4.93951	-1.56438	6.32e-05	scaffold_77697	Prostatic acid phosphatase	GO:0003993; GO:0004725; GO:0005615; GO:0005765; GO:0005771; GO:0005886; GO:0006144; GO:0006629; GO:0006772; GO:0008253; GO:0009117; GO:0012506; GO:0016020; GO:0016791; GO:0030141; GO:0030175; GO:0031985; GO:0033265; GO:0042131; GO:0042802; GO:0042803; GO:0045177; GO:0046085; GO:0051930; GO:0052642; GO:0060090; GO:0060168
Mnip_009106	1522	3.48735	5.79108	6.73e-05	scaffold_75923	Putative nuclease HARBI1	GO:0004518; GO:0005634; GO:0005737; GO:0046872
Mnip_020223	1230	8.56831	-1.88885	7.67e-05	scaffold_77717	-	-
Mnip_018315	803	6.75165	-1.4879	0.000109451	scaffold_77687	NADH dehydrogenase iron-sulfur protein 6, mitochondrial	GO:0001822; GO:0005739; GO:0005743; GO:0006120; GO:0006631; GO:0006936; GO:0007005; GO:0009060; GO:0010467; GO:0017145; GO:0022904; GO:0030330; GO:0032981; GO:0035264; GO:0042776; GO:0045271; GO:0051881; GO:0061458; GO:0072359; GO:0072497; GO:0072593; GO:0090398; GO:0097168
Mnip_019574	493	6.68488	-1.43755	0.000121306	scaffold_77704	-	-
Mnip_016311	2199	5.55427	-3.85373	0.000123361	scaffold_77669	Acylphosphatase-2	GO:0003998; GO:0005739; GO:0006796; GO:0042802
Mnip_001292	179	5.13957	-1.58036	0.00012593	scaffold_42502	NADH dehydrogenase 1 alpha subcomplex subunit 7	GO:0005739; GO:0005743; GO:0006120; GO:0016491; GO:0042773; GO:0045271
Mnip_001407	501	1.64461	10.0396	0.00012593	scaffold_43274	-	-
Mnip_016026	2619	5.63421	-6.43434	0.0001489	scaffold_77668	Tropomyosin	-
Mnip_021973	1061	6.69795	-1.28647	0.000184297	scaffold_77803	-	-
Mnip_005932	1371	8.60111	-1.71554	0.000193231	scaffold_71189	NADH dehydrogenase flavoprotein 2, mitochondrial	GO:0005739; GO:0005743; GO:0006120; GO:0008137; GO:0045271; GO:0046872; GO:0051537
Mnip_007995	1368	0.930463	9.29606	0.000222712	scaffold_74671	-	-
Mnip_014999	11383	4.96928	1.06756	0.000226383	scaffold_77655	Adenylate cyclase type 10	GO:0000287; GO:0003351; GO:0004016; GO:0005524; GO:0005576; GO:0005634; GO:0005856; GO:0005886; GO:0005929; GO:0006171; GO:0007283; GO:0035556; GO:0048471; GO:0071890
Mnip_021878	984	7.67831	-1.59459	0.000226383	scaffold_77779	Cytochrome b-c1 complex subunit 6, mitochondrial	GO:0005739; GO:0005743; GO:0006122; GO:0008121; GO:0045275; GO:0045333
Mnip_021444	2381	6.28644	-1.37114	0.000242473	scaffold_77746	MICOS complex subunit MIC27	GO:0042407; GO:0061617
Mnip_001217	1286	1.80421	10.2026	0.00026763	scaffold_41770	Protein ANTAGONIST OF LIKE HETEROCHROMATIN PROTEIN 1	GO:0003682; GO:0004518; GO:0005634; GO:0035098; GO:0035102; GO:0040029; GO:0046872
Mnip_001967	327	0.358758	8.687	0.00026763	scaffold_55220	-	-
Mnip_006845	1115	7.76035	-1.58773	0.00026763	scaffold_73044	Succinate dehydrogenase cytochrome b small subunit, mitochondrial	GO:0005743; GO:0006099; GO:0006121; GO:0020037; GO:0043495; GO:0045273; GO:0046872; GO:0048039
Mnip_010253	1014	6.10903	-1.28777	0.00026763	scaffold_77100	18S rRNA aminocarboxypropyltransferase	GO:0000154; GO:0000455; GO:0005829; GO:0016740; GO:0030490; GO:0106388; GO:1904047
Mnip_016984	986	7.49933	-1.27366	0.000269455	scaffold_77674	NADH dehydrogenase 1 beta subcomplex subunit 10	GO:0005743; GO:0045271
Mnip_010377	4971	5.27403	2.03245	0.000270496	scaffold_77166	Osteomodulin	GO:0005615; GO:0007155; GO:0030500; GO:0031012
Mnip_016074	815	7.7195	-1.60131	0.000271783	scaffold_77668	-	-
Mnip_021531	1117	7.3314	-1.42123	0.000281633	scaffold_77746	NADH dehydrogenase iron-sulfur protein 4, mitochondrial	GO:0005739; GO:0005743; GO:0007420; GO:0008137; GO:0022900; GO:0032981; GO:0045271; GO:0051591; GO:0072593
Mnip_001215	179	5.4038	-1.21561	0.000303096	scaffold_41753	NADH dehydrogenase 1 alpha subcomplex subunit 7	GO:0005739; GO:0005743; GO:0006120; GO:0016491; GO:0042773; GO:0045271
Mnip_001515	452	0.00438896	3.55729	0.000305136	scaffold_46355	Choline dehydrogenase, mitochondrial	GO:0005743; GO:0008812; GO:0019285; GO:0050660
Mnip_005139	1511	4.51179	-4.09055	0.000305136	scaffold_69543	-	-
Mnip_011940	1135	6.16981	-1.41572	0.000305136	scaffold_77550	NADH dehydrogenase 1 beta subcomplex subunit 7	GO:0005739; GO:0005743; GO:0005758; GO:0006120; GO:0008137; GO:0009060; GO:0042776; GO:0045271
Mnip_016598	1177	9.02073	-1.61518	0.000305136	scaffold_77672	-	-
Mnip_019434	525	6.86915	-3.51318	0.000305136	scaffold_77702	Protein lethal(2)essential for life	GO:0005634; GO:0005737; GO:0006446; GO:0009408; GO:0030018; GO:0042026; GO:0045214; GO:0048471; GO:0051082; GO:0061077
Mnip_021186	10589	7.54063	2.31162	0.000305136	scaffold_77743	Collagen alpha-2(I) chain	GO:0005201; GO:0005576; GO:0005581; GO:0046872
Mnip_022808	730	7.94692	-1.30429	0.000305136	scaffold_85441	Cytochrome c oxidase subunit NDUFA4	GO:0005739; GO:0005743; GO:0044877; GO:0045271; GO:0045277
Mnip_000615	749	6.84838	-1.42843	0.000308448	scaffold_32664	Probable NADH dehydrogenase 1 alpha subcomplex subunit 12	GO:0005739; GO:0005743; GO:0045271
Mnip_011578	2203	1.34514	-3.48718	0.000311035	scaffold_77526	-	-
Mnip_013557	607	8.47422	-1.24407	0.000316934	scaffold_77629	NADH dehydrogenase 1 beta subcomplex subunit 5, mitochondrial	GO:0005654; GO:0005739; GO:0005743; GO:0045271
Mnip_017661	2539	5.36302	1.73941	0.000325562	scaffold_77681	Myrosinase 1	GO:0005975; GO:0008422; GO:0019137; GO:0046872
Mnip_022816	730	7.99518	-1.3084	0.000325562	scaffold_85442	Cytochrome c oxidase subunit NDUFA4	GO:0005739; GO:0005743; GO:0044877; GO:0045271; GO:0045277
Mnip_016155	1095	6.34276	-1.15019	0.000352697	scaffold_77669	Chaperone protein DnaJ	GO:0005524; GO:0005737; GO:0006260; GO:0008270; GO:0009408; GO:0031072; GO:0042026; GO:0051082; GO:0051085
Mnip_002388	1967	4.25375	-2.2449	0.000354094	scaffold_58783	Lachesin	GO:0005886; GO:0007155; GO:0043005; GO:0098552
Mnip_022413	1866	3.08588	-2.09163	0.000354094	scaffold_77832	Guanine nucleotide exchange factor MSS4 homolog	GO:0005085; GO:0005829; GO:0006892; GO:0007264; GO:0008270; GO:0009925; GO:0015031; GO:0016020; GO:0045180; GO:0061865
Mnip_006272	1808	5.95681	-1.33457	0.000360984	scaffold_71980	Arrestin homolog	GO:0001664; GO:0002031; GO:0005737; GO:0007165
Mnip_019491	7725	5.96845	-1.89906	0.000360984	scaffold_77702	Cytosolic carboxypeptidase 1	GO:0001754; GO:0004181; GO:0005634; GO:0005737; GO:0005739; GO:0005829; GO:0006508; GO:0007005; GO:0008270; GO:0015630; GO:0015631; GO:0021702; GO:0021772; GO:0033077; GO:0035609; GO:0035610; GO:0043009; GO:0050905
Mnip_022530	3080	4.00915	-1.56511	0.000362714	scaffold_77832	Opsin, ultraviolet-sensitive	GO:0004930; GO:0007601; GO:0007602; GO:0009881; GO:0016020
Mnip_010906	4922	7.65541	2.95629	0.000366451	scaffold_77372	Cuticle protein 6	GO:0008010; GO:0062129
Mnip_011840	3260	8.04846	-1.04408	0.000366451	scaffold_77540	Adenylosuccinate synthetase	GO:0000287; GO:0004019; GO:0005525; GO:0005737; GO:0044208; GO:0046040
Mnip_019164	726	8.51007	-1.338	0.000366451	scaffold_77697	Cytochrome c oxidase subunit 6B2	GO:0005739; GO:0006119; GO:0030061; GO:0045277
Mnip_010972	5361	0.947296	9.31253	0.000375888	scaffold_77401	RNA-directed DNA polymerase from mobile element jockey	GO:0003964
Mnip_003786	1073	1.55578	9.94732	0.000398249	scaffold_65605	Protein ALP1-like	GO:0000118; GO:0004518; GO:0046872
Mnip_004746	731	-0.196244	8.07954	0.000398249	scaffold_68367	-	-
Mnip_020765	3452	9.64578	-1.08157	0.000404714	scaffold_77743	Putative phospholipase B-like lamina ancestor	GO:0004620; GO:0005576; GO:0007444; GO:0009395; GO:0046843
Mnip_015051	515	6.22436	-1.63271	0.00042307	scaffold_77655	NADH dehydrogenase 1 alpha subcomplex subunit 2	GO:0001835; GO:0005743; GO:0045271
Mnip_002649	706	7.51856	-1.45613	0.000451543	scaffold_60393	ATP synthase-coupling factor 6, mitochondrial	GO:0005739; GO:0005743; GO:0015078; GO:0015986; GO:0045259; GO:1902600
Mnip_018828	845	6.19335	-1.09753	0.000451543	scaffold_77695	NADH dehydrogenase 1 beta subcomplex subunit 3	GO:0005739; GO:0005743; GO:0022900; GO:0032981; GO:0045271
Mnip_021545	7007	6.41119	1.89582	0.000451543	scaffold_77746	-	-
Mnip_012340	6523	4.30177	-1.77052	0.000492383	scaffold_77597	T-box transcription factor TBX1	GO:0000785; GO:0000978; GO:0000981; GO:0001525; GO:0001568; GO:0001708; GO:0001755; GO:0001934; GO:0001945; GO:0002053; GO:0003007; GO:0003148; GO:0003151; GO:0003677; GO:0005634; GO:0006357; GO:0007368; GO:0007389; GO:0007498; GO:0007507; GO:0007517; GO:0007605; GO:0008283; GO:0008284; GO:0009952; GO:0021644; GO:0030855; GO:0030878; GO:0035019; GO:0035176; GO:0035909; GO:0042471; GO:0042472; GO:…
Mnip_019761	1273	8.55308	-1.55307	0.000516329	scaffold_77704	NADH dehydrogenase (ubiquinone) 23 kDa subunit	GO:0005739; GO:0005743; GO:0006120; GO:0008137; GO:0032981; GO:0042775; GO:0045271; GO:0046872; GO:0051539
Mnip_018814	3354	5.27547	-1.57497	0.000517997	scaffold_77695	-	-
Mnip_013097	17353	4.68402	-3.76223	0.000523195	scaffold_77616	Follistatin-A	GO:0005576; GO:0005615; GO:0009953; GO:0009994; GO:0030154; GO:0030510; GO:0030901; GO:0032926; GO:0043049; GO:0048185; GO:0048263; GO:0048703
Mnip_015510	7152	6.15687	4.47199	0.000557833	scaffold_77657	Pro-resilin	GO:0005576; GO:0008010; GO:0008061; GO:0030023; GO:0031012; GO:0032992; GO:0040003; GO:0042302; GO:0062129
Mnip_009367	13434	0.320409	-3.63438	0.000608053	scaffold_76204	Synaptic vesicle glycoprotein 2B	GO:0001504; GO:0001669; GO:0007268; GO:0008021; GO:0022857; GO:0030672; GO:0043195; GO:0098978; GO:0099509; GO:2000300
Mnip_021435	1015	6.85428	-1.27167	0.000608053	scaffold_77746	-	-
Mnip_003111	1290	4.80937	-1.39358	0.000624635	scaffold_62363	-	-
Mnip_005675	1281	7.32765	-1.38814	0.000624635	scaffold_70762	NADH dehydrogenase 1 beta subcomplex subunit 9	GO:0005739; GO:0005743; GO:0006120; GO:0009060; GO:0042776; GO:0045271
Mnip_021404	3749	4.15505	3.04899	0.000692317	scaffold_77746	-	-
Mnip_018622	7617	5.20671	2.17526	0.000727977	scaffold_77695	NPC intracellular cholesterol transporter 1 homolog 1b	GO:0005319; GO:0005886; GO:0007391; GO:0007417; GO:0007422; GO:0008203; GO:0015485; GO:0015918; GO:0016020; GO:0030299; GO:0030301; GO:0042632
Mnip_007706	1478	0.111322	8.4203	0.000733566	scaffold_74274	-	-
Mnip_019297	1302	6.26198	-1.32413	0.000767697	scaffold_77702	-	-
Mnip_013098	465	2.0739	-4.01179	0.0007888	scaffold_77616	-	-
Mnip_015676	3662	5.36837	4.32756	0.000819802	scaffold_77665	Endocuticle structural glycoprotein SgAbd-8	GO:0008010; GO:0062129
Mnip_001311	1829	9.09129	-1.31557	0.00082023	scaffold_42743	Triosephosphate isomerase	GO:0004807; GO:0005829; GO:0006094; GO:0006096; GO:0019563; GO:0046166
Mnip_004730	896	3.62467	1.96979	0.000835773	scaffold_68349	-	-
Mnip_004224	3009	0.0552875	8.36289	0.000848416	scaffold_66795	-	-
Mnip_007552	5759	3.00136	1.79504	0.000875181	scaffold_74026	-	-
Mnip_003621	4098	0.261582	6.69359	0.000879501	scaffold_65100	-	-
Mnip_010731	2241	5.9928	-2.50229	0.000914725	scaffold_77319	Methyltransferase-like protein 22	GO:0005634; GO:0005654; GO:0005730; GO:0006479; GO:0008276; GO:0016279; GO:0031072; GO:0032991
Mnip_008323	1602	4.26584	3.95238	0.000921897	scaffold_75073	Glucose dehydrogenase [FAD, quinone]	GO:0005576; GO:0050660; GO:0140762
Mnip_013870	43433	5.2034	-3.13016	0.000972832	scaffold_77638	Protein vestigial	GO:0001745; GO:0003677; GO:0003713; GO:0005634; GO:0006260; GO:0006357; GO:0007346; GO:0007451; GO:0007472; GO:0007473; GO:0007476; GO:0007480; GO:0007482; GO:0007525; GO:0016204; GO:0035220; GO:0042127; GO:0045944; GO:0048190; GO:0090254
Mnip_015185	2260	3.66872	-1.04702	0.000977254	scaffold_77656	Succinyl-CoA:acetate/propanoyl-CoA:succinate CoA transferase	GO:0003986; GO:0005739; GO:0006083; GO:0008775; GO:0043821
Mnip_015544	107242	5.72764	-2.03365	0.000977254	scaffold_77665	Tubulin monoglutamylase TTLL4	GO:0000226; GO:0005524; GO:0005829; GO:0005874; GO:0015631; GO:0018095; GO:0018200; GO:0036064; GO:0046872; GO:0070739; GO:0070740; GO:0097731; GO:0106437; GO:0120222
Mnip_019495	4611	4.4257	-1.73671	0.000979599	scaffold_77702	Cytosolic carboxypeptidase 1	GO:0001754; GO:0004181; GO:0005634; GO:0005737; GO:0005739; GO:0005829; GO:0006508; GO:0007005; GO:0008270; GO:0015630; GO:0015631; GO:0021702; GO:0021772; GO:0033077; GO:0035609; GO:0035610; GO:0043009; GO:0050905
Mnip_015044	1858	3.40131	-1.02436	0.000982855	scaffold_77655	Cyclin-dependent kinase 20	GO:0004674; GO:0004693; GO:0005524; GO:0005634; GO:0005737; GO:0005929; GO:0051301; GO:0060271; GO:0106310
Mnip_000910	2151	1.74464	5.68377	0.00103198	scaffold_38435	-	-
Mnip_004642	867	1.28666	-2.87063	0.00103198	scaffold_68151	-	-
Mnip_013774	5149	3.36206	-1.13087	0.00103198	scaffold_77638	RecQ-like DNA helicase Blm	GO:0000403; GO:0000724; GO:0000731; GO:0000732; GO:0003678; GO:0005524; GO:0005634; GO:0005694; GO:0005737; GO:0006260; GO:0006281; GO:0006302; GO:0006303; GO:0006974; GO:0007131; GO:0009378; GO:0016887; GO:0031422; GO:0043138; GO:0045003; GO:0046872; GO:1901291; GO:1990814; GO:1990918
Mnip_014471	310	7.87649	-1.56027	0.00103198	scaffold_77646	Cytochrome c oxidase subunit 7C, mitochondrial	GO:0005739; GO:0005743; GO:0006123; GO:0045277
Mnip_014726	4309	5.90525	-1.21414	0.00103198	scaffold_77650	Fatty-acid amide hydrolase 2	GO:0005811; GO:0016020; GO:0016042; GO:0017064; GO:0019369
Mnip_014931	7646	8.24195	3.06841	0.00103198	scaffold_77655	-	-
Mnip_015581	1241	6.27037	-3.48398	0.00103198	scaffold_77665	Ejaculatory bulb-specific protein 3	GO:0005576; GO:0007552; GO:0009615; GO:0042628
Mnip_018040	1170	7.93531	-16.3686	0.00103198	scaffold_77682	Troponin C, isoallergen Bla g 6.0101	GO:0005509; GO:0016460
Mnip_021835	13625	4.28228	2.64792	0.00103198	scaffold_77779	U-scoloptoxin(01)-Er1a	GO:0005576; GO:0008061; GO:0090729
Mnip_022722	1027	8.1303	-1.47132	0.00104031	scaffold_83061	ATP synthase subunit d, mitochondrial	GO:0005739; GO:0005743; GO:0006979; GO:0008340; GO:0015078; GO:0015986; GO:0032007; GO:0045259; GO:0046034; GO:0051881; GO:0070373; GO:1902600
Mnip_014990	3357	8.09505	-1.17791	0.00108377	scaffold_77655	Fumarate hydratase, mitochondrial	GO:0000050; GO:0000821; GO:0004333; GO:0005634; GO:0005694; GO:0005739; GO:0005759; GO:0005829; GO:0006099; GO:0006106; GO:0006108; GO:0006281; GO:0006525; GO:0006974; GO:0048873; GO:0120162; GO:2001034
Mnip_017749	1287	9.64021	-1.75149	0.00108377	scaffold_77681	Cytochrome b-c1 complex subunit Rieske, mitochondrial	GO:0005743; GO:0008121; GO:0046872; GO:0051537
Mnip_022721	1027	8.13066	-1.48146	0.00108377	scaffold_83060	ATP synthase subunit d, mitochondrial	GO:0005739; GO:0005743; GO:0006979; GO:0008340; GO:0015078; GO:0015986; GO:0032007; GO:0045259; GO:0046034; GO:0051881; GO:0070373; GO:1902600
Mnip_011159	1196	7.77954	-1.51384	0.00110764	scaffold_77442	NADH dehydrogenase iron-sulfur protein 7, mitochondrial	GO:0005743; GO:0006120; GO:0008137; GO:0009060; GO:0015990; GO:0032981; GO:0045271; GO:0046872; GO:0048038; GO:0051539
Mnip_017683	1406	7.77837	-1.29497	0.00116642	scaffold_77681	Cytochrome c oxidase subunit 6C	GO:0005743; GO:0006119; GO:0045277
Mnip_016958	26294	0.889512	-2.7092	0.00117087	scaffold_77674	-	-
Mnip_021630	3204	9.67385	2.54209	0.00117087	scaffold_77746	-	-
Mnip_013415	6430	1.97011	-1.50702	0.00128747	scaffold_77629	Juvenile hormone acid O-methyltransferase	GO:0006718; GO:0008049; GO:0008168; GO:0019010; GO:0032259
Mnip_010834	2969	2.99975	1.64497	0.00129268	scaffold_77354	Nose resistant to fluoxetine protein 6	GO:0006869; GO:0008289; GO:0016020; GO:0016747
Mnip_019542	2490	7.84971	-1.37644	0.00131018	scaffold_77704	-	-
Mnip_017792	749	8.30519	7.40313	0.00132787	scaffold_77681	-	-
Mnip_006563	530	6.30825	-1.14308	0.00140746	scaffold_72536	-	-
Mnip_011632	34398	9.0087	1.27284	0.00149275	scaffold_77537	-	-
Mnip_013213	564	7.05577	-1.36513	0.00150253	scaffold_77626	NADH dehydrogenase 1 beta subcomplex subunit 2, mitochondrial	GO:0005743; GO:0032981; GO:0045271
Mnip_016893	6633	5.12447	1.861	0.00150253	scaffold_77673	Protein spaetzle 3	GO:0005121; GO:0005576; GO:0005615; GO:0008083; GO:0021556; GO:0045087
Mnip_005901	10751	0.566769	8.91589	0.0015867	scaffold_71123	BEN domain-containing protein 5	GO:0003677; GO:0005794; GO:0045892
Mnip_009871	3839	4.59091	2.39357	0.0015867	scaffold_76831	Venom acid phosphatase Acph-1	GO:0003993; GO:0005576
Mnip_011913	2373	10.175	-1.90595	0.0015867	scaffold_77549	Cytochrome b-c1 complex subunit 2, mitochondrial	GO:0004222; GO:0005654; GO:0005739; GO:0005743; GO:0006119; GO:0006122; GO:0006508; GO:0009060; GO:0045275; GO:0045333; GO:0046872
Mnip_018276	3752	10.2681	-3.24809	0.00163609	scaffold_77687	Glycerol-3-phosphate dehydrogenase, mitochondrial	GO:0004368; GO:0005509; GO:0005739; GO:0005743; GO:0006072; GO:0006094; GO:0006127; GO:0019563; GO:0035264; GO:0043010
Mnip_000484	580	7.70898	-1.3723	0.00166485	scaffold_118	-	-
Mnip_015333	1971	5.30445	1.08597	0.00166485	scaffold_77657	Probable low-specificity L-threonine aldolase 2	GO:0004793; GO:0005829; GO:0006567; GO:0008732
Mnip_019691	1108	9.93651	-1.73179	0.00167679	scaffold_77704	ATP synthase subunit gamma, mitochondrial	GO:0005739; GO:0005743; GO:0015986; GO:0045259; GO:0046933
Mnip_003398	2016	4.01993	-1.68353	0.00168021	scaffold_63566	-	-
Mnip_010604	11836	5.99277	-1.3934	0.00168021	scaffold_77279	7SK snRNA methylphosphate capping enzyme	GO:0001510; GO:0005634; GO:0008171; GO:0008173; GO:0008757; GO:0016073; GO:0017069; GO:0040031; GO:1904871; GO:1905382; GO:1990276; GO:1990904
Mnip_021363	69181	4.21006	1.06446	0.00168021	scaffold_77746	Gamma-aminobutyric acid receptor subunit beta	GO:0004890; GO:0005230; GO:0005254; GO:0007214; GO:0008503; GO:0030672; GO:0034707; GO:0045211; GO:0099095
Mnip_012539	8063	6.26086	-2.4331	0.00173193	scaffold_77598	-	-
Mnip_014927	2056	9.30699	3.50186	0.00173193	scaffold_77655	-	-
Mnip_023095	665	1.98204	-2.09321	0.00173193	scaffold_96346	Linear gramicidin synthase subunit C	GO:0005829; GO:0008610; GO:0016853; GO:0016874; GO:0017000; GO:0031177; GO:0043041; GO:0044550
Mnip_012146	656	9.27493	-1.5871	0.00183089	scaffold_77579	Cytochrome c oxidase subunit 4 isoform 1, mitochondrial	GO:0005743; GO:0006123; GO:0045277
Mnip_001672	3059	5.65976	-1.16748	0.00184122	scaffold_48095	ATP-binding cassette sub-family G member 4	GO:0005524; GO:0005886; GO:0006355; GO:0010008; GO:0010875; GO:0016887; GO:0031410; GO:0033344; GO:0034041; GO:0042632; GO:0042802; GO:0042803; GO:0045542; GO:0046982; GO:0055085; GO:0071403; GO:1990830
Mnip_014777	4449	7.32615	-1.40821	0.00185084	scaffold_77653	5'-nucleotidase domain-containing protein 3	GO:0008253; GO:0046872
Mnip_002075	442	4.28757	-2.18239	0.00186479	scaffold_55988	Cytochrome P450 6k1	GO:0004497; GO:0005506; GO:0005789; GO:0016705; GO:0020037
Mnip_010903	3750	1.5859	2.95941	0.00186895	scaffold_77370	Copia protein	GO:0003676; GO:0004190; GO:0005524; GO:0006508; GO:0008270; GO:0015074; GO:0042575; GO:0071897
Mnip_019452	948	2.58461	1.65092	0.00189803	scaffold_77702	-	-
Mnip_014925	1633	3.21571	2.40616	0.00190877	scaffold_77655	-	-
Mnip_019754	2111	6.31322	-1.1999	0.00196405	scaffold_77704	Protoheme IX farnesyltransferase, mitochondrial	GO:0000266; GO:0002521; GO:0004311; GO:0005730; GO:0005739; GO:0005759; GO:0005829; GO:0006629; GO:0006784; GO:0007005; GO:0008495; GO:0008535; GO:0009060; GO:0017004; GO:0031966; GO:0035264; GO:0048034; GO:0055070; GO:0070069
Mnip_016940	3039	2.94825	1.33172	0.00197915	scaffold_77674	Glucose transporter GlcP	GO:0005886; GO:0015293
Mnip_016263	3376	6.01673	3.43658	0.00198163	scaffold_77669	Endochitinase	GO:0000272; GO:0005576; GO:0006032; GO:0008061; GO:0008843
Mnip_001581	3942	2.78766	3.24814	0.00200854	scaffold_47817	Copia protein	GO:0003676; GO:0004190; GO:0005524; GO:0006508; GO:0008270; GO:0015074; GO:0042575; GO:0071897
Mnip_001293	905	0.986194	-2.07605	0.00201612	scaffold_42503	Acyl-CoA Delta-9 desaturase	GO:0004768; GO:0005506; GO:0005789; GO:0006636
Mnip_015132	1495	8.96337	-2.12723	0.00205252	scaffold_77656	Phosphoglycerate mutase 1	GO:0004082; GO:0004619; GO:0005829; GO:0006094; GO:0016787; GO:0019901; GO:0061621
Mnip_021351	2069	7.46668	-1.06599	0.00206779	scaffold_77746	Putative serine protease F56F10.1	GO:0006508; GO:0008239; GO:0045087; GO:0045121; GO:0070008
Mnip_013779	2715	10.1248	1.65099	0.00210952	scaffold_77638	Venom carboxylesterase-6	GO:0005576; GO:0106435
Mnip_018251	35080	3.4133	-1.14025	0.00211244	scaffold_77687	Neurexin 1	GO:0007268; GO:0007274; GO:0007416; GO:0008306; GO:0031594; GO:0034185; GO:0040011; GO:0040012; GO:0042734; GO:0045211; GO:0046872; GO:0048488; GO:0050808; GO:0051124; GO:0061174; GO:0071938; GO:0097109; GO:1900073; GO:1900244; GO:2000331
Mnip_008184	264	1.39606	2.02899	0.00213471	scaffold_74917	-	-
Mnip_013359	1628	7.09619	-1.1218	0.00213726	scaffold_77628	NFU1 iron-sulfur cluster scaffold homolog, mitochondrial	GO:0005506; GO:0005739; GO:0016226; GO:0051536
Mnip_019396	1179	3.60222	-1.38944	0.00220288	scaffold_77702	U11/U12 small nuclear ribonucleoprotein 35 kDa protein	GO:0000398; GO:0003729; GO:0005689; GO:0005730; GO:0017069
Mnip_022969	4574	0.209151	4.36013	0.00220311	scaffold_89500	Mitogen-activated protein kinase kinase kinase 15	GO:0004709; GO:0005524; GO:0007254; GO:0038066; GO:0046872; GO:0106310
Mnip_000466	10350	0.277919	-2.77286	0.00225049	scaffold_118	NADPH oxidase 5	GO:0001525; GO:0001819; GO:0001935; GO:0005509; GO:0005783; GO:0005789; GO:0005886; GO:0006915; GO:0006952; GO:0015252; GO:0016175; GO:0020037; GO:0042554; GO:0043012; GO:0043020; GO:0050660; GO:0050661; GO:0061640; GO:0106292; GO:1902600; GO:2000379
Mnip_001598	3412	5.26726	1.17197	0.00225049	scaffold_47993	Inactive serine protease scarface	GO:0005576; GO:0005615; GO:0005737; GO:0006508; GO:0007390; GO:0007391; GO:0007394; GO:0007560; GO:0045087; GO:0045197; GO:0048802; GO:0048803; GO:0050793
Mnip_004268	676	8.18193	-1.48766	0.00225049	scaffold_66980	ATP synthase F(1) complex subunit delta, mitochondrial	GO:0005198; GO:0005739; GO:0005740; GO:0005743; GO:0009060; GO:0015078; GO:0033615; GO:0042776; GO:0045259; GO:0046933; GO:1902600
Mnip_010469	1488	2.29412	2.14943	0.00225049	scaffold_77242	-	-
Mnip_012993	596	9.86754	-2.92115	0.00225049	scaffold_77609	Cytochrome c	GO:0005758; GO:0009055; GO:0020037; GO:0046872
Mnip_013460	7260	4.45837	-1.01704	0.00225049	scaffold_77629	Aminopeptidase N	GO:0001525; GO:0001618; GO:0005615; GO:0005737; GO:0005886; GO:0006508; GO:0008270; GO:0016285; GO:0030154; GO:0042277; GO:0043171; GO:0070006
Mnip_014812	7733	1.23374	-1.96415	0.00225049	scaffold_77653	Dynein regulatory complex subunit 7	GO:0005737; GO:0005856; GO:0007283; GO:0007288; GO:0030317; GO:0031514
Mnip_016055	9152	5.62551	2.38081	0.00225049	scaffold_77668	-	-
Mnip_021044	4541	7.01448	1.38048	0.00225049	scaffold_77743	Neprilysin-11	GO:0004222; GO:0005886; GO:0016485; GO:0046872
Mnip_016342	1943	7.41325	-1.49199	0.00226025	scaffold_77670	Cytochrome b-c1 complex subunit 7	GO:0005739; GO:0005743; GO:0006122; GO:0045275; GO:0045333
Mnip_002724	3412	5.23557	1.13139	0.00233384	scaffold_60999	Inactive serine protease scarface	GO:0005576; GO:0005615; GO:0005737; GO:0006508; GO:0007390; GO:0007391; GO:0007394; GO:0007560; GO:0045087; GO:0045197; GO:0048802; GO:0048803; GO:0050793
Mnip_005324	927	9.96386	-1.35045	0.00247707	scaffold_69969	-	-
Mnip_007503	5237	0.371624	1.5938	0.00247707	scaffold_73921	Transposon Tf2-12 polyprotein	GO:0003677; GO:0003723; GO:0003887; GO:0003964; GO:0004190; GO:0004519; GO:0005634; GO:0006310; GO:0006508; GO:0015074; GO:0046872
Mnip_019068	524	6.78259	-1.75456	0.00247707	scaffold_77697	-	-
Mnip_020713	3812	6.06439	-1.47355	0.00247707	scaffold_77743	Putative inorganic phosphate cotransporter	GO:0005315; GO:0006814; GO:0015293; GO:0016020; GO:0022857; GO:0035435
Mnip_022848	2213	1.6894	-2.024	0.00247707	scaffold_85656	-	-
Mnip_000479	1060	7.98012	-1.54734	0.00252596	scaffold_118	Succinate dehydrogenase cytochrome b560 subunit, mitochondrial	GO:0005743; GO:0006099; GO:0006121; GO:0009055; GO:0020037; GO:0045273; GO:0046872
Mnip_018087	1666	8.88786	-1.84508	0.0025348	scaffold_77682	NADH dehydrogenase 1 alpha subcomplex subunit 10, mitochondrial	GO:0005737; GO:0005739; GO:0005743; GO:0005759; GO:0006120; GO:0045271
Mnip_020775	1232	6.6244	-1.46555	0.00254736	scaffold_77743	-	-
Mnip_016910	824	7.66801	-1.47245	0.00257623	scaffold_77673	-	-
Mnip_003549	1802	3.2215	2.16572	0.0025856	scaffold_64846	-	-
Mnip_019519	3757	5.37441	3.73013	0.0025856	scaffold_77702	4-coumarate--CoA ligase 1	GO:0005524; GO:0005737; GO:0009698; GO:0016207; GO:0050563; GO:0106286
Mnip_017397	2355	8.38839	-1.67172	0.00268296	scaffold_77680	Glucose-6-phosphate isomerase	GO:0001701; GO:0001707; GO:0002639; GO:0004347; GO:0005125; GO:0005615; GO:0005829; GO:0006002; GO:0006094; GO:0006096; GO:0010595; GO:0031625; GO:0034101; GO:0042593; GO:0048029; GO:0051156; GO:0060170; GO:0061621; GO:0097367
Mnip_018549	1617	8.1764	-1.11779	0.00268296	scaffold_77689	NADH dehydrogenase iron-sulfur protein 3, mitochondrial	GO:0005739; GO:0005743; GO:0006120; GO:0008137; GO:0045271; GO:0072593
Mnip_004902	1223	7.12032	-1.30139	0.00276802	scaffold_69068	NADH dehydrogenase 1 alpha subcomplex subunit 8	GO:0005739; GO:0005743; GO:0005758; GO:0006120; GO:0045271
Mnip_019148	1316	9.67292	-3.61227	0.00276802	scaffold_77697	Glycerol-3-phosphate dehydrogenase 1-like protein	GO:0005829; GO:0005975; GO:0042803; GO:0046168; GO:0051287; GO:0141152
Mnip_012040	1985	5.88926	-2.65644	0.00276924	scaffold_77552	-	-
Mnip_015811	901	9.37058	-1.5934	0.00276924	scaffold_77667	Cytochrome c oxidase subunit 5B, mitochondrial	GO:0004129; GO:0005739; GO:0005743; GO:0006123; GO:0031966; GO:0043434; GO:0045277; GO:0046872; GO:0097066
Mnip_009130	6358	6.63142	-1.25015	0.00282205	scaffold_75949	Putative protein kinase C delta type homolog	GO:0004674; GO:0004687; GO:0004699; GO:0005524; GO:0005886; GO:0008270; GO:0035556; GO:0060361; GO:0106310
Mnip_021546	9286	7.5409	2.41947	0.00282205	scaffold_77746	-	-
Mnip_012047	2293	9.36913	-1.6438	0.00284644	scaffold_77552	ATP synthase subunit b, mitochondrial	GO:0005739; GO:0005743; GO:0015078; GO:0015986; GO:0045259; GO:1902600
Mnip_010283	18560	9.53448	2.36026	0.00287573	scaffold_77123	U4/U6 small nuclear ribonucleoprotein Prp31	GO:0000244; GO:0000398; GO:0005634; GO:0005690; GO:0015030; GO:0016607; GO:0030622; GO:0046540; GO:0071005; GO:0071339
Mnip_002848	3413	2.5924	-1.57891	0.00288089	scaffold_61436	Solute carrier family 12 member 2	GO:0005886; GO:0006811; GO:0006883; GO:0006884; GO:0006972; GO:0007214; GO:0008511; GO:0008519; GO:0009925; GO:0010818; GO:0015079; GO:0015377; GO:0016020; GO:0016323; GO:0016324; GO:0016328; GO:0019901; GO:0030007; GO:0030321; GO:0030644; GO:0030659; GO:0031253; GO:0035633; GO:0035725; GO:0035865; GO:0042995; GO:0043005; GO:0043025; GO:0044297; GO:0044298; GO:0045795; GO:0046873; GO:0051087; GO:…
Mnip_015851	9417	9.14275	-1.55301	0.00288089	scaffold_77667	NADH dehydrogenase iron-sulfur protein 2, mitochondrial	GO:0005739; GO:0005743; GO:0006120; GO:0008137; GO:0019826; GO:0022008; GO:0032981; GO:0042063; GO:0045271; GO:0046872; GO:0048038; GO:0051287; GO:0051539; GO:0061351; GO:0071453
Mnip_004158	8242	3.54596	-1.51471	0.00289108	scaffold_66675	Xanthine dehydrogenase	GO:0004854; GO:0005506; GO:0016491; GO:0051537; GO:0071949
Mnip_013523	4487	5.73593	1.89879	0.00299914	scaffold_77629	-	-
Mnip_015350	1083	5.52079	4.14046	0.00300303	scaffold_77657	-	-
Mnip_018323	5497	6.48863	-2.10621	0.00303794	scaffold_77687	Neprilysin-4	GO:0004175; GO:0004222; GO:0005615; GO:0005886; GO:0006508; GO:0008237; GO:0016020; GO:0016485; GO:0016529; GO:0046872
Mnip_013924	1096	10.7808	-1.56766	0.00304863	scaffold_77639	ATP synthase F(1) complex catalytic subunit beta, mitochondrial	GO:0005524; GO:0005739; GO:0005743; GO:0015986; GO:0042776; GO:0045259; GO:0046933
Mnip_018438	1192	9.04169	-1.79677	0.00305601	scaffold_77689	Cytochrome c oxidase subunit 5A, mitochondrial	GO:0005743; GO:0006123; GO:0045277; GO:0046872
Mnip_018950	2814	2.37515	-3.39718	0.00306282	scaffold_77697	-	-
Mnip_016823	15819	9.21368	-1.01595	0.00315147	scaffold_77673	PDZ and LIM domain protein Zasp	GO:0001725; GO:0001952; GO:0003779; GO:0005912; GO:0005915; GO:0005925; GO:0005927; GO:0015629; GO:0016323; GO:0030018; GO:0030036; GO:0030239; GO:0031252; GO:0031941; GO:0042805; GO:0045177; GO:0045178; GO:0046872; GO:0051371; GO:0061061
Mnip_019735	1877	2.10905	-1.73108	0.00330756	scaffold_77704	-	-
Mnip_015411	2719	9.2587	-1.79654	0.00334736	scaffold_77657	Cytochrome c1, heme protein, mitochondrial	GO:0005739; GO:0005743; GO:0006122; GO:0008121; GO:0020037; GO:0033762; GO:0045275; GO:0045333; GO:0046872
Mnip_016957	808	0.0943741	-1.5086	0.00335222	scaffold_77674	-	-
Mnip_016009	2145	6.60534	-1.18528	0.00340192	scaffold_77668	Polymerase delta-interacting protein 2	GO:0003677; GO:0005634; GO:0005739; GO:0005759; GO:0005911; GO:0007005; GO:0016242; GO:0030496; GO:0030674; GO:0042645; GO:0045931; GO:0051894; GO:0070987; GO:0072686; GO:0090307; GO:1903490; GO:1990874
Mnip_017051	6851	10.4375	-1.01431	0.00340192	scaffold_77674	-	-
Mnip_002529	640	3.86197	-2.49019	0.00346416	scaffold_59205	Probable cytochrome P450 6a14	GO:0004497; GO:0005506; GO:0005789; GO:0016705; GO:0020037
Mnip_011187	7021	5.56356	-1.99664	0.00365905	scaffold_77442	-	-
Mnip_020967	675	7.65281	-1.80816	0.00371844	scaffold_77743	NADH dehydrogenase] 1 alpha subcomplex subunit 13	GO:0005524; GO:0005654; GO:0005737; GO:0005739; GO:0005743; GO:0009060; GO:0031966; GO:0032981; GO:0035458; GO:0042776; GO:0045039; GO:0045271; GO:0045732; GO:0045892; GO:0061133; GO:0071300; GO:0097191; GO:0098803; GO:1900119
Mnip_022653	1851	3.02938	1.50256	0.00371844	scaffold_80526	Cytochrome P450 4C1	GO:0005506; GO:0005789; GO:0016712; GO:0020037
Mnip_012638	1091	8.52482	-1.66904	0.00375558	scaffold_77599	ATP synthase subunit O, mitochondrial	GO:0005739; GO:0005743; GO:0042776; GO:0045259; GO:0046933; GO:1902600
Mnip_014832	9617	6.55574	4.22107	0.00376602	scaffold_77653	Probable cytochrome P450 304a1	GO:0004497; GO:0005506; GO:0005789; GO:0016705; GO:0020037
Mnip_022857	6289	5.26172	1.96784	0.0038575	scaffold_86083	-	-
Mnip_015470	8527	0.245271	1.56716	0.00385881	scaffold_77657	Rhodopsin	GO:0005502; GO:0005886; GO:0007186; GO:0007601; GO:0008020; GO:0016020; GO:0016038; GO:0016056; GO:0042622; GO:0046872; GO:0060342; GO:0097381
Mnip_013162	634	7.72386	-1.82578	0.00387215	scaffold_77626	Putative ATP synthase subunit f, mitochondrial	GO:0005739; GO:0031966; GO:0042776; GO:0045259; GO:1902600
Mnip_012217	22748	5.92108	-3.39567	0.00390262	scaffold_77592	Protein slowmo	GO:0005739; GO:0005758; GO:0007283; GO:0008345; GO:0015914; GO:0030432; GO:0030706; GO:1990050
Mnip_022604	826	1.03314	-2.34367	0.00396942	scaffold_78756	-	-
Mnip_016818	666	3.0181	-3.85835	0.00400349	scaffold_77673	-	-
Mnip_015888	1958	9.50658	-1.65098	0.0040368	scaffold_77667	NADH dehydrogenase flavoprotein 1, mitochondrial	GO:0005743; GO:0006120; GO:0008137; GO:0010181; GO:0045271; GO:0046872; GO:0051287; GO:0051539
Mnip_001866	973	2.80028	3.15033	0.00404699	scaffold_54693	Protein GAMETOPHYTE DEFECTIVE 1	GO:0005634; GO:0005730; GO:0005739; GO:0006364; GO:0008033; GO:0016787
Mnip_011958	1897	8.83377	1.2906	0.00415346	scaffold_77550	-	-
Mnip_010544	343	0.694988	-1.53066	0.00420271	scaffold_77268	-	-
Mnip_014776	411	2.03617	-1.29307	0.00422847	scaffold_77653	-	-
Mnip_004260	3058	-0.0756249	8.22201	0.00429437	scaffold_66950	BEN domain-containing protein 5	GO:0003677; GO:0045892
Mnip_016053	11751	5.60483	1.87877	0.00437121	scaffold_77668	Protein obstructor-E	GO:0005576; GO:0008010; GO:0008011; GO:0008061; GO:0040003; GO:0062129
Mnip_018812	1611	8.0882	-2.12844	0.0044562	scaffold_77695	-	-
Mnip_011074	5663	11.4604	-1.99153	0.00447571	scaffold_77434	Glyceraldehyde-3-phosphate dehydrogenase	GO:0004365; GO:0005737; GO:0005829; GO:0006006; GO:0006096; GO:0015630; GO:0050661; GO:0051287
Mnip_014384	758	2.5747	1.3884	0.00447571	scaffold_77644	-	-
Mnip_003255	464	-0.452335	7.79764	0.00447911	scaffold_62629	-	-
Mnip_010490	8845	8.78787	-2.05176	0.00447911	scaffold_77251	Glycogen debranching enzyme	GO:0004133; GO:0004134; GO:0004135; GO:0005576; GO:0005634; GO:0005737; GO:0005829; GO:0005978; GO:0005980; GO:0007584; GO:0016234; GO:0016529; GO:0030247; GO:0031593; GO:0034774; GO:0043033; GO:0051384; GO:1904813
Mnip_012131	8018	2.66587	-1.23483	0.00456212	scaffold_77579	Cathepsin 8	GO:0001974; GO:0005576; GO:0005764; GO:0005768; GO:0006508; GO:0008233; GO:0008234; GO:0030163; GO:0060707
Mnip_016081	2666	3.15354	2.14171	0.00467158	scaffold_77668	Transient receptor potential cation channel protein painless	GO:0005216; GO:0005227; GO:0005262; GO:0005886; GO:0006816; GO:0007620; GO:0007631; GO:0007638; GO:0008016; GO:0008049; GO:0008345; GO:0009408; GO:0009612; GO:0016020; GO:0019233; GO:0022857; GO:0034220; GO:0034704; GO:0042048; GO:0045924; GO:0048060; GO:0048266; GO:0050960; GO:0050965; GO:0050966; GO:0050974; GO:0070588; GO:0120168; GO:1902495
Mnip_016791	13406	3.1655	2.30467	0.00476552	scaffold_77673	Sodium- and chloride-dependent glycine transporter 2	GO:0001504; GO:0005886; GO:0015375; GO:0046872; GO:0098690; GO:0098793; GO:0098810
Mnip_010587	3940	4.48619	1.19365	0.0048232	scaffold_77277	Ribonucleoside-diphosphate reductase large subunit	GO:0000731; GO:0004748; GO:0005524; GO:0005635; GO:0005739; GO:0005829; GO:0005971; GO:0006206; GO:0006264; GO:0006281; GO:0008584; GO:0009185; GO:0009263; GO:0009265; GO:0010212; GO:0010971; GO:0021846; GO:0034451; GO:0036064; GO:0042802; GO:0043025; GO:0051290; GO:0060041; GO:0061731; GO:0070318; GO:0097718; GO:1900087
Mnip_013310	8688	9.58032	-2.01781	0.0048232	scaffold_77628	Pyruvate kinase	GO:0000287; GO:0004743; GO:0005524; GO:0005737; GO:0005739; GO:0005829; GO:0006090; GO:0006096; GO:0009744; GO:0016301; GO:0030955; GO:0042593; GO:0042866; GO:0043186; GO:0061621
Mnip_018094	3348	7.84472	-1.051	0.0048232	scaffold_77682	Multidrug resistance-associated protein 1	GO:0005524; GO:0005886; GO:0006691; GO:0006805; GO:0008559; GO:0009410; GO:0009925; GO:0015420; GO:0015431; GO:0015562; GO:0015889; GO:0016020; GO:0016323; GO:0016324; GO:0016328; GO:0016887; GO:0030148; GO:0034040; GO:0034599; GO:0034634; GO:0034775; GO:0042167; GO:0042626; GO:0042908; GO:0042910; GO:0043225; GO:0045332; GO:0046624; GO:0046943; GO:0050729; GO:0055085; GO:0060326; GO:0070062; GO:…
Mnip_016936	19987	8.01129	1.53952	0.00498777	scaffold_77673	Nidogen	GO:0005201; GO:0005509; GO:0005604; GO:0005615; GO:0007160; GO:0071711; GO:0110011; GO:2001197
Mnip_015354	4038	2.80535	-2.97836	0.00505435	scaffold_77657	-	-
Mnip_016750	61325	4.90298	1.06009	0.00512502	scaffold_77672	EGFR adapter protein	GO:0005925; GO:0030971; GO:0042059; GO:0045179
Mnip_014926	3789	9.41134	2.80313	0.00512949	scaffold_77655	-	-
Mnip_000720	2747	10.2961	-2.20414	0.00521689	scaffold_34636	Enolase	GO:0000015; GO:0000287; GO:0004634; GO:0005737; GO:0005829; GO:0005886; GO:0006094; GO:0006096; GO:0042593; GO:0061621
Mnip_001075	614	6.57977	-1.12789	0.00542025	scaffold_40097	Thioredoxin, mitochondrial	GO:0005739; GO:0015035; GO:0045454
Mnip_011296	885	1.33149	1.37086	0.00560823	scaffold_77487	-	-
Mnip_012216	375	4.12207	-2.99034	0.00560823	scaffold_77592	-	-
Mnip_019025	2626	9.75505	-1.69653	0.00560823	scaffold_77697	Mitochondrial-processing peptidase subunit beta	GO:0004222; GO:0005739; GO:0005759; GO:0006627; GO:0046872
Mnip_012359	1092	5.75927	-1.59827	0.00560942	scaffold_77597	-	-
Mnip_011670	8690	4.35957	-1.00639	0.00569911	scaffold_77537	Mitochondrial import inner membrane translocase subunit TIM14	GO:0001405; GO:0001671; GO:0005744; GO:0030150
Mnip_000633	994	0.237062	1.8141	0.00593682	scaffold_32898	-	-
Mnip_019151	1038	3.1832	-1.36855	0.00612846	scaffold_77697	Complex III assembly factor LYRM7	GO:0005759; GO:0034551; GO:0044183
Mnip_014555	1434	6.80507	2.43636	0.00617809	scaffold_77646	-	-
Mnip_015643	1062	3.36648	1.20325	0.00617809	scaffold_77665	-	-
Mnip_012111	3589	6.17363	-1.20036	0.00618366	scaffold_77579	Phosphorylase b kinase gamma catalytic chain, skeletal muscle/heart isoform	GO:0004689; GO:0005516; GO:0005524; GO:0005737; GO:0005829; GO:0005964; GO:0005975; GO:0005977; GO:0007165; GO:0019899; GO:0106310
Mnip_022627	2666	3.25565	2.19662	0.00618366	scaffold_79790	Transient receptor potential cation channel protein painless	GO:0005216; GO:0005227; GO:0005262; GO:0005886; GO:0006816; GO:0007620; GO:0007631; GO:0007638; GO:0008016; GO:0008049; GO:0008345; GO:0009408; GO:0009612; GO:0016020; GO:0019233; GO:0022857; GO:0034220; GO:0034704; GO:0042048; GO:0045924; GO:0048060; GO:0048266; GO:0050960; GO:0050965; GO:0050966; GO:0050974; GO:0070588; GO:0120168; GO:1902495
Mnip_019109	20639	6.60642	1.41509	0.00623899	scaffold_77697	Chitin synthase chs-2	GO:0004100; GO:0005886; GO:0006031; GO:0061063
Mnip_006715	692	5.17559	-1.91472	0.00624708	scaffold_72837	Homeodomain-only protein	GO:0003677; GO:0005634; GO:0005737; GO:0006357; GO:0007507; GO:0030154
Mnip_013253	4079	9.05184	-1.26181	0.00628557	scaffold_77628	NADH-ubiquinone oxidoreductase 75 kDa subunit, mitochondrial	GO:0005739; GO:0005743; GO:0005758; GO:0006120; GO:0008137; GO:0009055; GO:0009060; GO:0032981; GO:0042776; GO:0043209; GO:0045271; GO:0046872; GO:0051537; GO:0051539
Mnip_015850	4360	3.95103	-2.07886	0.00633165	scaffold_77667	-	-
Mnip_021040	4910	14.9721	1.72663	0.00633165	scaffold_77743	-	-
Mnip_005365	2395	-0.00975519	3.03439	0.00654612	scaffold_70022	Copia protein	GO:0003676; GO:0004190; GO:0005524; GO:0006508; GO:0008270; GO:0015074; GO:0042575; GO:0071897
Mnip_008775	9854	8.10238	2.43299	0.00654612	scaffold_75531	-	-
Mnip_009553	2269	7.4049	-1.47905	0.00670425	scaffold_76425	Cytochrome P450 6k1	GO:0004497; GO:0005506; GO:0005789; GO:0016705; GO:0020037
Mnip_010501	53713	5.96827	1.43631	0.00676661	scaffold_77251	-	-
Mnip_019214	24074	7.48838	1.40194	0.00676661	scaffold_77697	Fibrillin-2	GO:0001527; GO:0005179; GO:0005201; GO:0005509; GO:0005576; GO:0009653; GO:0030023; GO:0030326; GO:0030501; GO:0031012; GO:0035583; GO:0043010; GO:0045669; GO:0048048; GO:0060346; GO:0062023
Mnip_008660	3454	-0.309387	3.61909	0.00692664	scaffold_75413	-	-
Mnip_010916	4729	3.47603	-1.53567	0.00692664	scaffold_77372	Venom allergen 3	GO:0005576
Mnip_008321	3801	3.60361	1.15633	0.00705577	scaffold_75071	Probable cytochrome P450 305a1	GO:0004497; GO:0005506; GO:0005789; GO:0016705; GO:0020037
Mnip_001155	2260	8.63612	-1.72727	0.00718703	scaffold_41153	Isocitrate dehydrogenase] subunit beta, mitochondrial	GO:0000287; GO:0005739; GO:0006099; GO:0006102; GO:0016616; GO:0051287
Mnip_003941	8767	1.07449	-1.94925	0.00718703	scaffold_66121	-	-
Mnip_011911	2445	4.9975	1.71394	0.0072595	scaffold_77549	Protein APCDD1	GO:0001942; GO:0005886; GO:0016055; GO:0017147; GO:0030178; GO:0042487; GO:0042802; GO:0043615
Mnip_015943	4025	9.20096	1.66911	0.0072595	scaffold_77667	Chitin deacetylase 1	GO:0000272; GO:0004099; GO:0005615; GO:0006032; GO:0008061; GO:0008270
Mnip_012195	18052	5.35319	1.01078	0.00725952	scaffold_77592	Glutamate decarboxylase	GO:0004351; GO:0005737; GO:0005829; GO:0006538; GO:0007416; GO:0007528; GO:0008345; GO:0008355; GO:0009449; GO:0009612; GO:0030170
Mnip_020945	3422	5.46865	2.18715	0.00745373	scaffold_77743	U-scoloptoxin(01)-Cw1a	GO:0005576; GO:0008061; GO:0090729
Mnip_015673	3986	3.44344	-1.08824	0.0074779	scaffold_77665	Retinol dehydrogenase 11	GO:0001523; GO:0001917; GO:0004745; GO:0005789; GO:0007601; GO:0016616; GO:0033721; GO:0042572; GO:0042574; GO:0052650; GO:0102354; GO:0110095
Mnip_010009	8031	10.004	-2.53893	0.007513	scaffold_76962	Solute carrier family 25 member 3	GO:0005315; GO:0005739; GO:0005743; GO:0015317; GO:0043209; GO:0044877; GO:1990547
Mnip_011718	1158	3.29986	1.71317	0.00784222	scaffold_77540	-	-
Mnip_016822	15607	9.71367	-1.31858	0.00784222	scaffold_77673	2-oxoglutarate dehydrogenase complex component E1	GO:0004591; GO:0005634; GO:0005739; GO:0005759; GO:0006091; GO:0006096; GO:0006099; GO:0006103; GO:0006104; GO:0030976; GO:0031966; GO:0045252; GO:0046872
Mnip_017838	4904	4.49571	2.53981	0.00784222	scaffold_77681	Endoglucanase E-4	GO:0008810; GO:0030245; GO:0030248
Mnip_014537	56075	7.95079	2.09208	0.00785496	scaffold_77646	Transmembrane matrix receptor MUP-4	GO:0005509; GO:0005737; GO:0005856; GO:0005886; GO:0007155; GO:0030056; GO:0098733
Mnip_020808	6432	3.8847	1.17585	0.00792087	scaffold_77743	Probable cytochrome P450 301a1, mitochondrial	GO:0004497; GO:0005506; GO:0007490; GO:0016705; GO:0020037; GO:0031966
Mnip_002411	1003	1.05053	-2.86563	0.00794119	scaffold_58798	-	-
Mnip_001671	2346	5.58453	1.15605	0.00798604	scaffold_48094	Putative defense protein 3	GO:0005576; GO:0016020; GO:0042742; GO:0042832; GO:0045087
Mnip_009686	384	3.31787	1.09413	0.00821365	scaffold_76641	-	-
Mnip_017040	765	9.4874	-1.22975	0.00821365	scaffold_77674	Coiled-coil-helix-coiled-coil-helix domain-containing protein 2	GO:0005634; GO:0005739; GO:0005758; GO:0007005; GO:0034599; GO:0043565; GO:0045944; GO:0140297; GO:1900037; GO:1905448
Mnip_001551	1377	3.04301	-1.36449	0.008374	scaffold_47228	Titin	GO:0000794; GO:0002020; GO:0003009; GO:0003300; GO:0004672; GO:0004674; GO:0004713; GO:0005509; GO:0005516; GO:0005524; GO:0005576; GO:0005829; GO:0005865; GO:0006936; GO:0006941; GO:0007076; GO:0008307; GO:0010628; GO:0010737; GO:0019887; GO:0019899; GO:0019901; GO:0030018; GO:0030049; GO:0030240; GO:0030241; GO:0031430; GO:0031433; GO:0031674; GO:0035995; GO:0042802; GO:0042803; GO:0042805; GO:…
Mnip_022657	2004	1.28687	1.7191	0.008374	scaffold_80534	-	-
Mnip_022442	1482	7.34613	-3.75703	0.00847134	scaffold_77832	-	-
Mnip_015918	1828	5.04976	2.20725	0.00849808	scaffold_77667	-	-
Mnip_015711	5589	4.02673	-1.2316	0.00851061	scaffold_77665	-	-
Mnip_019189	12061	3.2822	1.14476	0.0085613	scaffold_77697	Probable cytochrome P450 6a20	GO:0002118; GO:0004497; GO:0005506; GO:0005789; GO:0016705; GO:0020037; GO:0050829
Mnip_003250	2863	0.612515	1.20858	0.00870378	scaffold_62599	-	-
Mnip_018250	318	0.84735	-1.36389	0.00870378	scaffold_77687	-	-
Mnip_019319	2279	4.48997	-1.21435	0.00883674	scaffold_77702	G2/mitotic-specific cyclin-B	GO:0016538; GO:0044772; GO:0051301
Mnip_018339	724	4.31522	1.37506	0.00886316	scaffold_77687	-	-
Mnip_022980	4449	6.37193	-1.02312	0.00886316	scaffold_89967	-	-
Mnip_018720	5083	4.54024	-2.87959	0.0088874	scaffold_77695	-	-
Mnip_007413	7193	0.518088	3.55771	0.00889784	scaffold_73834	Probable RNA-directed DNA polymerase from transposon X-element	GO:0003964; GO:0006313
Mnip_010250	3410	9.60437	-2.00342	0.00904135	scaffold_77100	Succinate--CoA ligase] subunit beta, mitochondrial	GO:0004775; GO:0005524; GO:0005739; GO:0006099; GO:0006104; GO:0042709; GO:0046872
Mnip_014930	2206	3.8238	3.01975	0.00923048	scaffold_77655	Cuticle protein AM1274	GO:0008010; GO:0062129
Mnip_019936	6409	2.70743	-1.23865	0.00938929	scaffold_77711	1-phosphatidylinositol 4,5-bisphosphate phosphodiesterase	GO:0001580; GO:0002385; GO:0004435; GO:0004629; GO:0005096; GO:0005509; GO:0006644; GO:0006651; GO:0007200; GO:0007601; GO:0007602; GO:0007623; GO:0008344; GO:0008654; GO:0009649; GO:0016027; GO:0016028; GO:0016042; GO:0019722; GO:0030265; GO:0043052; GO:0043153; GO:0045494; GO:0046488; GO:0046673; GO:0048015; GO:0051209; GO:0071482; GO:2000370
Mnip_015776	4437	6.65062	-2.10781	0.00963513	scaffold_77667	-	-
Mnip_022411	14558	1.33856	-1.31131	0.00973163	scaffold_77832	Trypsin-7	GO:0004252; GO:0005576; GO:0006508; GO:0007586
Mnip_016797	17756	8.09398	2.24999	0.0097457	scaffold_77673	Cadherin-89D	GO:0005509; GO:0005886; GO:0007156; GO:0016339; GO:0044331; GO:0098609
Mnip_019316	864	0.796826	-1.7467	0.0097457	scaffold_77702	-	-
Mnip_012742	4277	10.0911	-1.80159	0.00975022	scaffold_77604	Malate dehydrogenase, mitochondrial	GO:0005759; GO:0006099; GO:0006108; GO:0006734; GO:0009060; GO:0030060; GO:0042803
Mnip_022689	1853	0.759015	2.25734	0.0100551	scaffold_81837	-	-
Mnip_017908	1852	7.98635	-1.20225	0.0104865	scaffold_77681	NADH dehydrogenase 1 alpha subcomplex subunit 9, mitochondrial	GO:0003954; GO:0005743; GO:0005759; GO:0007623; GO:0044877; GO:0045271
Mnip_012452	1375	8.82913	1.43562	0.010514	scaffold_77597	Very-long-chain enoyl-CoA reductase	GO:0005634; GO:0005783; GO:0005789; GO:0006665; GO:0016491; GO:0017099; GO:0030497; GO:0035338; GO:0042761; GO:0102758
Mnip_014634	1967	9.19432	-2.03807	0.0109367	scaffold_77650	Probable pyruvate dehydrogenase E1 component subunit alpha, mitochondrial	GO:0004739; GO:0005739; GO:0005759; GO:0006086; GO:0046872
Mnip_013780	4419	4.94813	1.24563	0.0110942	scaffold_77638	Ionotropic receptor 21a	GO:0005886; GO:0008066; GO:0035249; GO:0040040; GO:0050804; GO:0050961; GO:0060170; GO:0098839; GO:1904315
Mnip_019852	2529	4.12739	5.31266	0.011101	scaffold_77705	-	-
Mnip_020940	1174	9.07832	2.41913	0.0112031	scaffold_77743	-	-
Mnip_005667	971	9.2686	-1.81673	0.0113405	scaffold_70755	-	-
Mnip_020230	56983	2.95608	1.45649	0.0113405	scaffold_77717	Probable nuclear hormone receptor HR38	GO:0000977; GO:0000978; GO:0000981; GO:0001046; GO:0004879; GO:0005102; GO:0005634; GO:0005667; GO:0005737; GO:0006357; GO:0008270; GO:0035259; GO:0042335; GO:0043565; GO:0045944; GO:0046982; GO:0048082; GO:0071376
Mnip_021045	3517	3.87137	1.6196	0.0113405	scaffold_77743	-	-
Mnip_006964	3700	0.888361	1.94136	0.0114171	scaffold_73240	Transient receptor potential cation channel protein painless	GO:0005216; GO:0005227; GO:0005262; GO:0005886; GO:0006816; GO:0007620; GO:0007631; GO:0007638; GO:0008016; GO:0008049; GO:0008345; GO:0009408; GO:0009612; GO:0016020; GO:0019233; GO:0022857; GO:0034220; GO:0034704; GO:0042048; GO:0045924; GO:0048060; GO:0048266; GO:0050960; GO:0050965; GO:0050966; GO:0050974; GO:0070588; GO:0120168; GO:1902495
Mnip_017822	547	6.90771	7.77521	0.0114319	scaffold_77681	Flexible cuticle protein 12	GO:0008010; GO:0062129
Mnip_004727	565	2.62246	1.24234	0.0114764	scaffold_68346	-	-
Mnip_017066	1936	8.28173	-1.46928	0.0114764	scaffold_77674	Isocitrate dehydrogenase subunit gamma, mitochondrial	GO:0000287; GO:0005739; GO:0006099; GO:0006102; GO:0008047; GO:0016616; GO:0045242; GO:0051287
Mnip_002797	3350	1.16577	3.70024	0.0119082	scaffold_61309	-	-
Mnip_011954	19750	6.43074	1.03585	0.0119082	scaffold_77550	Inactive pancreatic lipase-related protein 1	GO:0004465; GO:0004806; GO:0005509; GO:0005576; GO:0006633; GO:0008970; GO:0019433; GO:0034375; GO:0042632
Mnip_008796	4830	1.29961	-3.91543	0.0121352	scaffold_75583	-	-
Mnip_012428	3029	2.81662	-1.0639	0.0121352	scaffold_77597	Alpha-tocopherol transfer protein	GO:0001892; GO:0005546; GO:0005770; GO:0005829; GO:0006629; GO:0008431; GO:0009636; GO:0042360; GO:0043325; GO:0051180; GO:0090212; GO:0120009; GO:0120013; GO:1900223; GO:1902936
Mnip_014758	3384	7.87946	-1.33357	0.0121352	scaffold_77653	-	-
Mnip_020714	1877	1.37438	-1.35719	0.0121352	scaffold_77743	Sperm flagellar protein 1	GO:0001578; GO:0003341; GO:0005874; GO:0005902; GO:0005930; GO:0007026; GO:0008017; GO:0016323; GO:0016324; GO:0016477; GO:0030027; GO:0030032; GO:0030175; GO:0046847; GO:0051493; GO:0097542; GO:0097729; GO:1904158; GO:1990716; GO:2000095
Mnip_013512	10373	9.62421	1.72561	0.0121703	scaffold_77629	U-scoloptoxin(01)-Cw1a	GO:0005576; GO:0008061; GO:0090729
Mnip_020247	2180	-0.219459	2.60961	0.0121703	scaffold_77723	-	-
Mnip_018160	4983	1.40668	1.25623	0.0124685	scaffold_77687	G-protein coupled receptor moody	GO:0004930; GO:0005886; GO:0005919; GO:0007186; GO:0007419; GO:0008366; GO:0016020; GO:0019991; GO:0030866; GO:0035095; GO:0048148; GO:0048149; GO:0060857
Mnip_020617	7779	8.16352	1.39993	0.0127009	scaffold_77743	-	-
Mnip_017140	1060	3.34233	-1.16207	0.0129268	scaffold_77675	E3 ubiquitin-protein ligase TRIM45	GO:0005654; GO:0005737; GO:0005829; GO:0008270; GO:0043161; GO:0045171; GO:0050728; GO:0060348; GO:0061630; GO:0070936
Mnip_012472	8628	2.20277	-2.17152	0.0130602	scaffold_77597	Adipokinetic hormone/corazonin-related peptide receptor variant I	GO:0004930; GO:0005886
Mnip_010302	1617	7.98595	-1.71805	0.0134391	scaffold_77123	5-aminolevulinate synthase, erythroid-specific, mitochondrial	GO:0001666; GO:0003870; GO:0005739; GO:0005743; GO:0005759; GO:0006782; GO:0006783; GO:0020027; GO:0030170; GO:0030218; GO:0035162; GO:0042541; GO:0048821
Mnip_019472	2417	6.80805	1.89388	0.0137478	scaffold_77702	-	-
Mnip_012648	3547	6.80158	-2.4759	0.0138141	scaffold_77599	Mitochondrial pyruvate carrier 2	GO:0005634; GO:0005739; GO:0005743; GO:0006086; GO:0006850; GO:0035774; GO:0042802; GO:0050833; GO:0098800
Mnip_012538	1031	-0.0534512	-2.46906	0.0138364	scaffold_77598	-	-
Mnip_002850	1387	1.3083	-1.88439	0.0139924	scaffold_61436	Bumetanide-sensitive sodium-(potassium)-chloride cotransporter	GO:0006884; GO:0008511; GO:0016020; GO:0055064; GO:0055075; GO:0055078; GO:1990573
Mnip_014394	15531	3.49391	1.09077	0.0140425	scaffold_77644	Transcription factor ATOH8	GO:0000785; GO:0000981; GO:0001704; GO:0001937; GO:0003700; GO:0005634; GO:0005654; GO:0005737; GO:0007399; GO:0009653; GO:0010595; GO:0010629; GO:0016607; GO:0030154; GO:0035148; GO:0045603; GO:0045892; GO:0045893; GO:0045944; GO:0046983; GO:0051450; GO:0060391; GO:0070888; GO:0140297; GO:1902895
Mnip_002686	1802	2.76677	-1.54428	0.0141636	scaffold_60841	Alpha-tocopherol transfer protein-like	GO:0016020; GO:1902936
Mnip_011961	4529	0.159595	2.29696	0.0142037	scaffold_77550	-	-
Mnip_019183	4578	11.6354	-2.12743	0.0142037	scaffold_77697	Aconitate hydratase, mitochondrial	GO:0003994; GO:0005506; GO:0005739; GO:0006099; GO:0006101; GO:0043209; GO:0051539
Mnip_019387	1251	5.45335	-1.07495	0.014322	scaffold_77702	sn-1-specific diacylglycerol lipase ABHD11	GO:0005739; GO:0005759; GO:0016298; GO:0045252
Mnip_017053	937	4.76504	1.72942	0.0143691	scaffold_77674	-	-
Mnip_018740	1212	3.6965	1.44884	0.0145842	scaffold_77695	-	-
Mnip_022690	1853	0.746723	2.10145	0.0146905	scaffold_81838	-	-
Mnip_003107	8134	2.27709	-1.47329	0.0147701	scaffold_62352	Xanthine dehydrogenase	GO:0004854; GO:0005506; GO:0016491; GO:0051537; GO:0071949
Mnip_010757	2283	2.18565	1.07659	0.0148239	scaffold_77340	Clavesin-1	GO:0005768; GO:0005802; GO:0007040; GO:0030136; GO:0031901; GO:0080025
Mnip_011731	2895	11.2394	-1.51536	0.0148239	scaffold_77540	ATP synthase subunit alpha, mitochondrial	GO:0005524; GO:0005739; GO:0005743; GO:0015986; GO:0019915; GO:0022900; GO:0043531; GO:0045259; GO:0046933
Mnip_017396	974	6.10556	-1.71464	0.0148864	scaffold_77680	Glucose-6-phosphate isomerase	GO:0004347; GO:0005829; GO:0006002; GO:0006094; GO:0042593; GO:0048029; GO:0051156; GO:0061621; GO:0097367
Mnip_020537	1325	8.43228	2.00124	0.0149062	scaffold_77739	-	-
Mnip_018641	21148	8.83886	-2.23442	0.0149719	scaffold_77695	Tropomodulin	GO:0002119; GO:0005523; GO:0005737; GO:0005856; GO:0005865; GO:0007015; GO:0009792; GO:0030016; GO:0030239; GO:0030835; GO:0040011; GO:0045214; GO:0051015; GO:0051694; GO:0071689; GO:1990357
Mnip_012022	2385	2.95649	-1.21585	0.0150227	scaffold_77552	-	-
Mnip_017811	14360	8.30104	-1.99837	0.0150227	scaffold_77681	Bifunctional trehalose-6-phosphate synthase/phosphatase	GO:0003825; GO:0004805; GO:0005829; GO:0005992; GO:0046872
Mnip_022862	4830	1.21845	-3.78789	0.0151059	scaffold_86207	-	-
Mnip_012133	1868	7.57618	-1.92089	0.0151872	scaffold_77579	Pyruvate dehydrogenase E1 component subunit beta, mitochondrial	GO:0004739; GO:0005739; GO:0005759; GO:0006086; GO:0045254; GO:0046872
Mnip_006346	4104	0.115443	1.27508	0.0153403	scaffold_72205	Transposon Tf2-12 polyprotein	GO:0003677; GO:0003723; GO:0003887; GO:0003964; GO:0004190; GO:0004519; GO:0005634; GO:0006310; GO:0006508; GO:0015074; GO:0046872
Mnip_020187	16989	4.12186	1.44497	0.0153403	scaffold_77717	63 kDa sperm flagellar membrane protein	GO:0005509; GO:0005886; GO:0031514; GO:0098552
Mnip_012211	7121	11.632	-1.96876	0.0153599	scaffold_77592	Pheromone-binding protein Gp-9	GO:0005550; GO:0005615; GO:0019236; GO:0035176
Mnip_013260	24668	3.99757	1.42726	0.0154339	scaffold_77628	Hormone receptor 4	GO:0000785; GO:0004879; GO:0005634; GO:0005737; GO:0006357; GO:0008270; GO:0034056; GO:0040018; GO:0048638; GO:0071456; GO:0106023; GO:0120143
Mnip_013300	2599	4.12753	-4.39706	0.0157065	scaffold_77628	Lipase 3	GO:0004620; GO:0004806; GO:0016042
Mnip_018417	1184	2.9056	-1.37924	0.015923	scaffold_77689	-	-
Mnip_011920	6541	8.30294	-1.48142	0.0160245	scaffold_77550	Leucine-rich repeat-containing protein 3	GO:0005615; GO:0016020; GO:0031012
Mnip_019851	2277	4.53906	4.30379	0.0160245	scaffold_77705	-	-
Mnip_003611	2736	7.44363	-2.83078	0.0160517	scaffold_65060	Retrovirus-related Pol polyprotein from type-2 retrotransposable element R2DM	GO:0003964; GO:0004190; GO:0004519; GO:0006508; GO:0008270
Mnip_015814	1423	4.36837	1.09721	0.0163243	scaffold_77667	F-box/LRR-repeat protein 3	GO:0004842; GO:0005634; GO:0005654; GO:0005829; GO:0016567; GO:0016604; GO:0019005; GO:0031146; GO:0031648; GO:0042752; GO:0043153; GO:0043161; GO:0048511
Mnip_010924	6571	7.52155	1.00032	0.0165854	scaffold_77372	Rho-related BTB domain-containing protein 1	GO:0003924; GO:0005525; GO:0005856; GO:0005886; GO:0007015; GO:0007163; GO:0007165; GO:0007264; GO:0008360; GO:0010008; GO:0019901; GO:0030865; GO:0031410; GO:0032956; GO:0042995
Mnip_015582	1329	3.95811	-1.52399	0.0165854	scaffold_77665	Ejaculatory bulb-specific protein 3	GO:0005576; GO:0007552; GO:0009615; GO:0042628
Mnip_015574	12583	6.74823	-1.46088	0.0166235	scaffold_77665	Proton-coupled amino acid transporter 2	GO:0005280; GO:0005297; GO:0005789; GO:0005886; GO:0015180; GO:0015187; GO:0015193; GO:0015808; GO:0015816; GO:0015824; GO:0055038; GO:1902600
Mnip_018813	4140	1.73882	-1.23025	0.0166235	scaffold_77695	-	-
Mnip_013859	10837	1.34155	2.44061	0.0167055	scaffold_77638	-	-
Mnip_020907	2927	8.50561	-1.29741	0.0167257	scaffold_77743	Probable isocitrate dehydrogenase subunit alpha, mitochondrial	GO:0000287; GO:0004449; GO:0005739; GO:0005759; GO:0006099; GO:0006102; GO:0045242; GO:0051287
Mnip_021039	4857	3.07271	1.55787	0.0167257	scaffold_77743	Delta-like protein 4	GO:0000122; GO:0001525; GO:0001569; GO:0001974; GO:0003180; GO:0003208; GO:0003209; GO:0003222; GO:0003344; GO:0005112; GO:0005509; GO:0005886; GO:0007219; GO:0007601; GO:0008285; GO:0010596; GO:0010628; GO:0010629; GO:0030217; GO:0035912; GO:0035924; GO:0043537; GO:0044344; GO:0045746; GO:0045747; GO:0048018; GO:0050767; GO:0060579; GO:0061074; GO:0072554; GO:0090051; GO:1903588; GO:2000179
Mnip_019453	13894	6.60216	1.27942	0.0170685	scaffold_77702	43 kDa receptor-associated protein of the synapse homolog	GO:0005737; GO:0005886; GO:0007271; GO:0008270; GO:0031594; GO:0033130; GO:0043495; GO:1900075
Mnip_021792	1080	0.29007	3.21868	0.0171094	scaffold_77779	-	-
Mnip_020231	330	0.122612	1.14166	0.0174383	scaffold_77717	-	-
Mnip_017888	2533	7.96078	-1.83717	0.0174821	scaffold_77681	ATP-dependent clpX-like chaperone, mitochondrial	GO:0004176; GO:0005524; GO:0005654; GO:0005739; GO:0005743; GO:0005759; GO:0005829; GO:0008270; GO:0009368; GO:0009841; GO:0016504; GO:0016887; GO:0042645; GO:0046034; GO:0046983; GO:0051082; GO:0051603; GO:0140662
Mnip_018811	12586	4.59242	2.43534	0.0177354	scaffold_77695	-	-
Mnip_015302	1119	7.10361	-1.66467	0.0177789	scaffold_77656	Ejaculatory bulb-specific protein 3	GO:0005576; GO:0007552; GO:0009615; GO:0042628
Mnip_009235	428	0.645277	1.82429	0.0184618	scaffold_76065	Putative nuclease HARBI1	GO:0004518; GO:0005634; GO:0005737; GO:0046872
Mnip_011977	1777	1.68873	-1.63816	0.0184618	scaffold_77552	Kinesin-like protein KIF23	GO:0000022; GO:0000281; GO:0003777; GO:0005524; GO:0005634; GO:0005654; GO:0005737; GO:0005739; GO:0005813; GO:0005819; GO:0005829; GO:0005871; GO:0005874; GO:0005925; GO:0007018; GO:0008017; GO:0016887; GO:0030496; GO:0032467; GO:0051256; GO:0072686; GO:0090543; GO:0097149
Mnip_009685	642	-0.412482	1.78418	0.0185524	scaffold_76641	Transposable element Tc1 transposase	GO:0003677; GO:0004519; GO:0005634; GO:0006313; GO:0015074
Mnip_010703	6679	5.7965	1.21043	0.018615	scaffold_77308	-	-
Mnip_013811	11091	7.18019	-1.02735	0.0189371	scaffold_77638	Cysteine-rich motor neuron 1 protein	GO:0004867; GO:0005576; GO:0016020
Mnip_018913	6321	8.47558	-2.1954	0.0189371	scaffold_77695	ATP-dependent 6-phosphofructokinase	GO:0003872; GO:0005524; GO:0005739; GO:0005829; GO:0005945; GO:0006002; GO:0006096; GO:0009744; GO:0030388; GO:0042593; GO:0046872; GO:0061621; GO:0070095
Mnip_019478	2746	8.83294	-1.04183	0.0189371	scaffold_77702	Uncharacterized protein KIAA0232	GO:0005524
Mnip_017241	2944	5.84813	-1.10049	0.0191478	scaffold_77675	5&apos	GO:0002953; GO:0046872
Mnip_020034	17076	10.4907	-2.32785	0.0192624	scaffold_77711	Probable citrate synthase 1, mitochondrial	GO:0004108; GO:0005759; GO:0005975; GO:0006099; GO:0006101
Mnip_010568	2840	5.98041	-1.37402	0.0193506	scaffold_77268	-	-
Mnip_001180	1234	2.0032	-1.35749	0.0196017	scaffold_41465	Acyl-CoA Delta-9 desaturase	GO:0004768; GO:0005506; GO:0005789; GO:0006636
Mnip_019798	2211	2.94067	-1.10156	0.0196017	scaffold_77704	CLIP domain-containing serine protease HP8	GO:0004175; GO:0004252; GO:0005576; GO:0005737; GO:0006508; GO:0046872
Mnip_005348	1899	6.37686	-1.14234	0.0204108	scaffold_70005	Mitochondrial-processing peptidase subunit beta	GO:0004222; GO:0005739; GO:0005759; GO:0006627; GO:0046872
Mnip_007881	1440	-0.685661	2.33841	0.0204108	scaffold_74513	-	-
Mnip_012234	3153	6.73309	-2.06465	0.0204108	scaffold_77592	Adenosine deaminase	GO:0004000; GO:0005615; GO:0006154; GO:0046103; GO:0046872
Mnip_012023	2115	2.77891	-1.08674	0.0205455	scaffold_77552	-	-
Mnip_005730	569	-0.538971	-1.80594	0.0207061	scaffold_70867	-	-
Mnip_015919	1088	5.75364	2.1579	0.0207061	scaffold_77667	-	-
Mnip_017894	3122	6.63212	-1.21346	0.0209246	scaffold_77681	Selenoprotein Pb	GO:0001887; GO:0005576; GO:0008430
Mnip_021046	3505	14.1548	2.0395	0.021129	scaffold_77743	-	-
Mnip_011050	2820	2.57797	1.15124	0.0212003	scaffold_77426	-	-
Mnip_001919	1946	8.81041	-1.94862	0.0213138	scaffold_55051	Phosphoglycerate kinase	GO:0004618; GO:0005524; GO:0005829; GO:0006094; GO:0006096; GO:0007268; GO:0030018; GO:0031430; GO:0043531; GO:0045202; GO:0046716; GO:0046872; GO:0061621
Mnip_002585	928	-0.253191	-2.35285	0.0218086	scaffold_59358	Putative nuclease HARBI1	GO:0004518; GO:0005634; GO:0005737; GO:0046872
Mnip_004935	4649	0.696398	3.20907	0.0219625	scaffold_69137	RNA-directed DNA polymerase from mobile element jockey	GO:0003964
Mnip_020823	1390	1.69938	-1.04498	0.02206	scaffold_77743	PBAN-type neuropeptides	GO:0005576; GO:0007218
Mnip_017054	1066	3.01767	1.81611	0.0222859	scaffold_77674	-	-
Mnip_006266	597	1.86424	-4.40654	0.0222994	scaffold_71954	-	-
Mnip_021702	3418	6.71128	2.69553	0.0223274	scaffold_77750	-	-
Mnip_002701	1571	10.1356	-1.57001	0.022337	scaffold_60955	ATP synthase F(0) complex subunit C1, mitochondrial	GO:0008289; GO:0015252; GO:0015986; GO:0031966; GO:0033177; GO:0045259; GO:1902600
Mnip_012331	1965	11.2069	1.71824	0.0224163	scaffold_77597	-	-
Mnip_002942	1103	0.434705	1.94032	0.0224413	scaffold_61948	-	-
Mnip_013558	4428	2.12772	-1.69973	0.0225693	scaffold_77629	Facilitated trehalose transporter Tret1	GO:0005886; GO:0015574; GO:0015771; GO:0051119
Mnip_013812	1048	2.85744	-1.69072	0.0226604	scaffold_77638	E3 ubiquitin-protein ligase mib1	GO:0005737; GO:0006897; GO:0007219; GO:0008270; GO:0016567; GO:0034451; GO:0061630
Mnip_016187	911	11.1292	1.13827	0.022808	scaffold_77669	-	-
Mnip_007063	2276	8.48773	-1.12726	0.0232	scaffold_73340	Succinate--CoA ligase] subunit alpha, mitochondrial	GO:0000166; GO:0004774; GO:0004775; GO:0004776; GO:0005739; GO:0006099; GO:0009361; GO:0045244
Mnip_020535	9148	7.41404	1.45045	0.0232387	scaffold_77739	-	-
Mnip_014554	777	7.35453	2.44628	0.0233336	scaffold_77646	-	-
Mnip_012526	15987	7.14531	1.22835	0.0234187	scaffold_77598	Multiple C2 and transmembrane domain-containing protein 1	GO:0005509; GO:0005789; GO:0016020; GO:0030336; GO:0030672; GO:0045806; GO:0046928; GO:0048168; GO:0055037; GO:1902883
Mnip_018541	30547	7.72959	1.39251	0.0234441	scaffold_77689	Chitotriosidase-1	GO:0000272; GO:0004553; GO:0004568; GO:0005576; GO:0005615; GO:0005764; GO:0006032; GO:0006955; GO:0008061; GO:0008843; GO:0009617; GO:0035580; GO:0044245; GO:1904724
Mnip_009312	6788	10.8026	-1.71163	0.0238601	scaffold_76144	Fructose-bisphosphate aldolase	GO:0004332; GO:0005829; GO:0006001; GO:0006094; GO:0006096; GO:0007498; GO:0019682; GO:0030018; GO:0030388; GO:0031430; GO:0042593; GO:0061609; GO:0061621
Mnip_014759	2187	4.63879	1.52368	0.0241579	scaffold_77653	-	-
Mnip_012024	384	-0.366178	-1.47049	0.0241959	scaffold_77552	-	-
Mnip_003631	3451	2.09292	-3.00238	0.0244015	scaffold_65146	Putative fatty acyl-CoA reductase CG5065	GO:0005777; GO:0005778; GO:0008611; GO:0010025; GO:0035336; GO:0080019; GO:0102965
Mnip_002680	3620	2.27122	3.01742	0.0245795	scaffold_60742	-	-
Mnip_017676	1637	5.81756	1.4462	0.0246522	scaffold_77681	Trypsin-1	GO:0004252; GO:0005576; GO:0006508; GO:0007586
Mnip_010247	4147	1.01625	-1.36048	0.0246765	scaffold_77100	Leucine-rich repeat and guanylate kinase domain-containing protein	GO:0001669; GO:0002177; GO:0005524; GO:0007283; GO:0016301; GO:0030154; GO:0035082; GO:0042995
Mnip_018200	5571	0.333799	1.07232	0.0254305	scaffold_77687	-	-
Mnip_003112	1739	6.94862	-1.70516	0.0254764	scaffold_62363	-	-
Mnip_006939	2336	1.90809	-1.4861	0.0254764	scaffold_73204	Probable cytochrome P450 6a13	GO:0004497; GO:0005506; GO:0005789; GO:0016705; GO:0020037; GO:0042742
Mnip_021495	4792	6.52685	3.42474	0.0254764	scaffold_77746	Cytosolic 10-formyltetrahydrofolate dehydrogenase	GO:0004029; GO:0005829; GO:0006730; GO:0006740; GO:0009058; GO:0009258; GO:0016155
Mnip_004265	1220	-0.642095	-2.40232	0.0256978	scaffold_66962	-	-
Mnip_011829	17289	3.81606	-1.33125	0.0256978	scaffold_77540	Serine protease filzig	GO:0004252; GO:0005886; GO:0006508; GO:0035149; GO:0060439; GO:0098595
Mnip_022811	3051	4.31006	1.60061	0.0261598	scaffold_85441	RNA-directed DNA polymerase from mobile element jockey	GO:0003964
Mnip_019473	2638	7.18674	-2.26391	0.0261845	scaffold_77702	Haloacid dehalogenase-like hydrolase domain-containing 5	GO:0005739
Mnip_022819	3051	4.34708	1.60037	0.0261845	scaffold_85442	RNA-directed DNA polymerase from mobile element jockey	GO:0003964
Mnip_010573	14949	3.46146	1.25618	0.0262108	scaffold_77268	BMP and activin membrane-bound inhibitor homolog	GO:0005109; GO:0005737; GO:0005886; GO:0007179; GO:0008284; GO:0008360; GO:0010718; GO:0016020; GO:0016477; GO:0030512; GO:0030514; GO:0045668; GO:0045893; GO:0090263
Mnip_018208	7007	9.44624	1.9649	0.0266029	scaffold_77687	-	-
Mnip_016056	3330	8.93071	1.4383	0.0267002	scaffold_77668	Protein obstructor-E	GO:0005576; GO:0008010; GO:0008011; GO:0008061; GO:0040003; GO:0062129
Mnip_011397	17661	11.9054	-1.03757	0.0267782	scaffold_77488	Arginine kinase	GO:0004054; GO:0004111; GO:0005524; GO:0005615; GO:0046314
Mnip_019943	441	5.3409	2.57244	0.0267782	scaffold_77711	Endocuticle structural glycoprotein SgAbd-8	GO:0008010; GO:0062129
Mnip_009720	47349	10.1258	-1.63544	0.0272055	scaffold_76693	Glycogen phosphorylase	GO:0005737; GO:0005829; GO:0005980; GO:0008184; GO:0008286; GO:0008340; GO:0030170; GO:0042803; GO:0045824; GO:0050829
Mnip_016817	10825	9.5791	-1.51971	0.0272666	scaffold_77673	PDZ and LIM domain protein Zasp	GO:0001725; GO:0001952; GO:0003779; GO:0005912; GO:0005915; GO:0005925; GO:0005927; GO:0015629; GO:0016323; GO:0030018; GO:0030036; GO:0030239; GO:0031252; GO:0031941; GO:0042805; GO:0045177; GO:0045178; GO:0046872; GO:0051371; GO:0061061
Mnip_022606	1682	0.13961	1.2663	0.0272666	scaffold_78922	-	-
Mnip_014924	1328	1.96212	1.96395	0.0275076	scaffold_77655	Pupal cuticle protein Edg-78E	GO:0008010; GO:0008011; GO:0040003; GO:0062129
Mnip_022607	1682	0.474424	1.38576	0.0283535	scaffold_78922	-	-
Mnip_000852	455	1.54033	1.73629	0.0283751	scaffold_37854	-	-
Mnip_013309	2787	5.05481	-1.02952	0.0286184	scaffold_77628	Phospholipase A1	GO:0005615; GO:0008970; GO:0016042; GO:0017171; GO:0031640
Mnip_018267	16956	6.24865	1.35337	0.028901	scaffold_77687	Nose resistant to fluoxetine protein 6	GO:0006869; GO:0008289; GO:0016020; GO:0016747
Mnip_021270	744	3.39694	1.07256	0.0295915	scaffold_77743	BTB/POZ domain-containing protein KCTD16	GO:0001662; GO:0007613; GO:0008277; GO:0042734; GO:0042995; GO:0043235; GO:0045211; GO:0051260; GO:0099579; GO:0150047
Mnip_018162	1627	1.13081	1.18582	0.0295955	scaffold_77687	-	-
Mnip_015479	6200	6.24556	1.02072	0.0296566	scaffold_77657	-	-
Mnip_003369	278	5.09484	1.11381	0.0299298	scaffold_63307	-	-
Mnip_004850	5124	7.53376	1.01027	0.0299298	scaffold_68821	Lysosomal-trafficking regulator	GO:0002446; GO:0002456; GO:0005829; GO:0006644; GO:0006909; GO:0007017; GO:0007040; GO:0007596; GO:0009410; GO:0032438; GO:0032816; GO:0033299; GO:0033364; GO:0042742; GO:0042832; GO:0043473; GO:0048753; GO:0051607; GO:0055091; GO:0071621
Mnip_012457	5660	5.82094	1.05045	0.0300434	scaffold_77597	LHFPL tetraspan subfamily member 3 protein	GO:0005886; GO:0007605
Mnip_018128	6217	7.64755	1.16434	0.030161	scaffold_77687	C-1-tetrahydrofolate synthase, cytoplasmic	GO:0000105; GO:0004329; GO:0004477; GO:0004488; GO:0005524; GO:0005829; GO:0006164; GO:0009086; GO:0035999
Mnip_019441	4347	3.97781	-1.2074	0.0310327	scaffold_77702	Fatty acyl-CoA reductase 1	GO:0005777; GO:0005778; GO:0008611; GO:0010025; GO:0035336; GO:0080019; GO:0102965
Mnip_010257	6004	8.65182	-1.40804	0.0315653	scaffold_77100	Dihydrolipoyllysine-residue succinyltransferase component of 2-oxoglutarate dehydrogenase complex, mitochondrial	GO:0004149; GO:0005634; GO:0005739; GO:0005759; GO:0006099; GO:0006103; GO:0006104; GO:0016746; GO:0033512; GO:0045252
Mnip_011579	2064	1.18441	-1.55599	0.0317668	scaffold_77526	-	-
Mnip_014104	780	1.95197	-1.41697	0.0320263	scaffold_77640	-	-
Mnip_013923	1867	9.86662	-1.56603	0.0325038	scaffold_77639	ATP synthase subunit beta, mitochondrial	GO:0005524; GO:0005739; GO:0005743; GO:0015986; GO:0016887; GO:0042776; GO:0045259; GO:0046933
Mnip_015946	7941	7.99712	1.35767	0.0326435	scaffold_77667	Chitin deacetylase 1	GO:0000272; GO:0004099; GO:0005615; GO:0006032; GO:0008061; GO:0008270
Mnip_009343	1716	3.93419	-2.42613	0.0327942	scaffold_76164	-	-
Mnip_016289	4588	2.38228	1.28653	0.0331413	scaffold_77669	Transcription factor MafA	GO:0000978; GO:0000981; GO:0005634; GO:0009749; GO:0030073
Mnip_016228	1435	0.501294	3.54997	0.0332298	scaffold_77669	-	-
Mnip_014527	6586	9.37772	-1.24949	0.0335324	scaffold_77646	Vitellogenin-1	GO:0005319; GO:0005576; GO:0045735
Mnip_014587	3212	5.25212	-1.14668	0.0337206	scaffold_77650	Nonsense-mediated mRNA decay factor SMG9	GO:0000184
Mnip_010432	341	-0.0829537	-2.38057	0.0337644	scaffold_77196	-	-
Mnip_016578	16597	6.7671	1.35755	0.0341198	scaffold_77672	Lysosomal-trafficking regulator	GO:0002446; GO:0002456; GO:0005829; GO:0006644; GO:0006909; GO:0007017; GO:0007040; GO:0007596; GO:0009410; GO:0032438; GO:0032816; GO:0033299; GO:0033364; GO:0042742; GO:0042832; GO:0043473; GO:0048753; GO:0051607; GO:0055091; GO:0071621
Mnip_009306	7631	5.80796	1.08997	0.0342808	scaffold_76140	-	-
Mnip_016186	729	11.9299	1.46426	0.0342808	scaffold_77669	-	-
Mnip_015467	6495	-0.1427	3.0963	0.0347609	scaffold_77657	MFS-type transporter clz9	GO:0003676; GO:0005886; GO:0022857
Mnip_014556	707	15.7142	1.97771	0.034858	scaffold_77646	-	-
Mnip_001580	893	0.660971	-1.38006	0.0354072	scaffold_47805	Aldehyde oxidase 1	GO:0004031; GO:0005506; GO:0005829; GO:0006629; GO:0006805; GO:0042803; GO:0043546; GO:0050660; GO:0051287; GO:0051537; GO:0071949
Mnip_020536	1472	10.5473	1.83169	0.0354072	scaffold_77739	-	-
Mnip_004389	2124	2.92855	1.5486	0.0354121	scaffold_67514	Rho GTPase-activating protein 190	GO:0003924; GO:0005096; GO:0005525; GO:0005829; GO:0007266; GO:0007415; GO:0008361; GO:0016319; GO:0030215; GO:0045792; GO:0050770
Mnip_020941	4722	5.05951	2.35094	0.0360455	scaffold_77743	-	-
Mnip_017580	2086	-0.582736	2.40512	0.0361032	scaffold_77680	Aquaporin AQPcic	GO:0005886; GO:0015267
Mnip_007987	8795	2.05871	1.81071	0.0363995	scaffold_74660	Gonadotropin-releasing hormone II receptor	GO:0004930; GO:0005886; GO:0016500; GO:0032870; GO:0042277
Mnip_021109	14059	4.72776	-1.30636	0.0368086	scaffold_77743	-	-
Mnip_019011	175093	6.36902	1.20353	0.0372647	scaffold_77697	ADAMTS-like protein 3	GO:0005576; GO:0030198; GO:0031012; GO:0043231
Mnip_020312	3708	7.28391	1.82016	0.0372889	scaffold_77734	Hexamerin 110	GO:0005615; GO:0005634; GO:0005730; GO:0030139; GO:0045735
Mnip_018640	318	2.7847	-1.36379	0.0374035	scaffold_77695	-	-
Mnip_012896	10790	6.53015	-2.19511	0.0377797	scaffold_77605	Lipid storage droplets surface-binding protein 1	GO:0005811; GO:0005829; GO:0006642; GO:0006869; GO:0010883; GO:0010890; GO:0010898; GO:0019915; GO:0032994; GO:0034389; GO:1990044
Mnip_000800	581	-0.0759556	2.0685	0.0378813	scaffold_36823	-	-
Mnip_008477	2563	0.770108	2.31509	0.0382149	scaffold_75229	-	-
Mnip_017055	4606	1.75282	1.9036	0.0382149	scaffold_77674	-	-
Mnip_008823	11922	0.672941	-1.79969	0.0383471	scaffold_75606	-	-
Mnip_018739	1384	5.23526	-1.81236	0.0384613	scaffold_77695	-	-
Mnip_000513	7605	4.20916	1.27489	0.0402612	scaffold_118	Carotenoid isomerooxygenase	GO:0003834; GO:0004497; GO:0007602; GO:0007603; GO:0007604; GO:0009110; GO:0010436; GO:0016063; GO:0016119; GO:0016121; GO:0035238; GO:0042572; GO:0042574; GO:0046872; GO:0106422
Mnip_012523	5655	8.00668	-1.10407	0.0405236	scaffold_77598	Phenoloxidase 1	GO:0004503; GO:0005576; GO:0042438; GO:0045087; GO:0046872
Mnip_001973	248	-0.70118	1.31575	0.0408944	scaffold_55349	Cryptochrome-1	GO:0000122; GO:0003677; GO:0003690; GO:0005634; GO:0005737; GO:0005739; GO:0006094; GO:0007623; GO:0009416; GO:0009785; GO:0009882; GO:0014823; GO:0016922; GO:0019901; GO:0019902; GO:0019915; GO:0031397; GO:0031398; GO:0032868; GO:0032922; GO:0033762; GO:0042593; GO:0042752; GO:0042754; GO:0042770; GO:0042826; GO:0043153; GO:0045721; GO:0045722; GO:0045744; GO:0045892; GO:0070888; GO:0071949; GO:…
Mnip_014947	1230	5.05629	1.09407	0.0410937	scaffold_77655	-	-
Mnip_010473	6071	0.0497599	1.42253	0.0413407	scaffold_77242	-	-
Mnip_000783	375	-0.749013	1.67158	0.0421908	scaffold_36535	Xaa-Pro aminopeptidase ApepP	GO:0005829; GO:0006508; GO:0046872; GO:0070006
Mnip_018324	5677	9.57773	-2.48996	0.0421908	scaffold_77687	Neprilysin-1	GO:0004222; GO:0005576; GO:0005886; GO:0016485; GO:0046872
Mnip_009747	17209	3.80327	1.08306	0.042294	scaffold_76722	Chorion peroxidase	GO:0001516; GO:0004601; GO:0005615; GO:0006979; GO:0007304; GO:0007306; GO:0020037; GO:0030707; GO:0042743; GO:0042744; GO:0046872; GO:0140825
Mnip_014503	8416	4.09284	-1.2352	0.0425816	scaffold_77646	Venom serine protease 34	GO:0004252; GO:0005576; GO:0006508
Mnip_018426	3664	3.08707	-1.28409	0.0426215	scaffold_77689	Venom acid phosphatase Acph-1	GO:0003993; GO:0005576
Mnip_010258	1887	3.422	-2.45446	0.0436238	scaffold_77100	-	-
Mnip_020076	1324	3.56313	1.29291	0.0439487	scaffold_77711	-	-
Mnip_018787	25228	3.4984	1.03391	0.0440814	scaffold_77695	-	-
Mnip_010991	8937	8.62167	-1.46947	0.0447235	scaffold_77408	Succinate dehydrogenase [ubiquinone] flavoprotein subunit, mitochondrial	GO:0005730; GO:0005739; GO:0005743; GO:0005759; GO:0006099; GO:0006105; GO:0006121; GO:0007399; GO:0008177; GO:0009055; GO:0022904; GO:0042776; GO:0045273; GO:0050660
Mnip_012239	2867	6.77073	1.15745	0.0447235	scaffold_77592	Proton-coupled zinc antiporter SLC30A1	GO:0000139; GO:0005789; GO:0005886; GO:0006882; GO:0010312; GO:0016323; GO:0019855; GO:0030659; GO:0031965; GO:0042742; GO:0046872; GO:0062111; GO:0140826; GO:0140882
Mnip_019730	3968	7.419	1.70583	0.0447235	scaffold_77704	Glucose dehydrogenase [FAD, quinone]	GO:0005576; GO:0006006; GO:0008364; GO:0016491; GO:0046693; GO:0050660; GO:0140762
Mnip_004731	300	0.669795	1.07817	0.0448529	scaffold_68349	-	-
Mnip_003827	1800	3.87251	-2.04903	0.0452333	scaffold_65757	Histone-lysine N-methyltransferase SMYD3	GO:0000978; GO:0000993; GO:0001162; GO:0005634; GO:0005654; GO:0005829; GO:0006334; GO:0008270; GO:0014904; GO:0032259; GO:0045184; GO:0045944; GO:0071549; GO:0140939; GO:0140954; GO:0140999
Mnip_008787	2388	1.89057	-1.80345	0.0452333	scaffold_75568	-	-
Mnip_021780	3472	1.02102	2.09272	0.0452333	scaffold_77779	-	-
Mnip_020552	6086	8.56133	1.07304	0.0457493	scaffold_77739	Transketolase	GO:0004802; GO:0005789; GO:0009052; GO:0030976; GO:0040008; GO:0046872
Mnip_017707	1935	2.04319	-1.15773	0.0457718	scaffold_77681	Escargot/snail protein homolog	GO:0000978; GO:0000981; GO:0005634; GO:0008270
Mnip_001589	453	0.695125	2.41864	0.046792	scaffold_47905	-	-
Mnip_013163	20697	5.14836	-1.67171	0.0470753	scaffold_77626	Glycogen-binding subunit 76A	GO:0000164; GO:0005979; GO:0008157; GO:0045725; GO:0045818; GO:2001069
Mnip_019116	13893	6.33015	1.01684	0.0473289	scaffold_77697	Putative epidermal cell surface receptor	GO:0002168; GO:0005102; GO:0005178; GO:0005198; GO:0005615; GO:0005886; GO:0007155; GO:0007411; GO:0016324; GO:0038023; GO:0045597; GO:0070062; GO:0099156
Mnip_021811	1939	6.00182	-1.05779	0.0473767	scaffold_77779	WD40 repeat-containing protein SMU1	GO:0000381; GO:0000398; GO:0005634; GO:0005737; GO:0008380; GO:0016607; GO:0071005; GO:0071011
Mnip_001271	890	1.49006	-1.07837	0.0475897	scaffold_42442	Fatty acyl-CoA reductase 2	GO:0005777; GO:0005778; GO:0035336; GO:0080019; GO:0102965
Mnip_011633	25955	5.66132	1.14256	0.04788	scaffold_77537	Fibulin-1	GO:0005201; GO:0005509; GO:0005576; GO:0005604; GO:0008104; GO:0016504; GO:0030198; GO:0040017
Mnip_001775	3627	0.834482	1.16294	0.047903	scaffold_53611	-	-
Mnip_020651	447	0.206782	-1.06862	0.0480351	scaffold_77743	-	-
Mnip_007282	4220	7.18485	-1.21071	0.0493449	scaffold_73637	-	-
Mnip_010491	1634	1.45044	-1.10206	0.0493449	scaffold_77251	-	-
Mnip_010809	9760	3.43777	-1.3705	0.0494905	scaffold_77351	DNA polymerase theta	GO:0000731; GO:0003677; GO:0003887; GO:0005524; GO:0005634; GO:0016787; GO:0017116; GO:0031297; GO:0042645; GO:0051575; GO:0071897; GO:0097681; GO:1901255
