# Supplementary material
Source: Research Square preprint supplement (doi:10.21203/rs.3.rs-10017901/v1)
Supplement: Supplementary file 3 [file 36ebaef0c6502d930b4dd1a8.xlsx]

## Sheet: Table S2
Table S2. SNPs associated with queen polymorphism in M. nipponica.
SNP_ID	2040_23	9499_133	12188_159	22905_1	30520_71	30924_63	34578_99	38315_210	38332_57	38349_24	51536_59	96353_30	110748_97	110974_68	110985_63	111002_133	111113_24	111249_13	111365_124	111374_0	111381_27	111399_67	111489_5	111609_42	111625_28	111641_41	111677_22	111687_21	111730_2	111908_15	111921_34	111949_27	112006_33	112020_9	112091_33	112181_45	112475_61	112504_21	112512_80	112598_12	112609_104	112681_42	112685_18	112725_118	112848_97	112923_6	112992_11	112996_89	113001_78
scaffold	28375	63253	67342	74335	76968	77032	77357	77517	77517	77517	77629	77711	77815	77815	77815	77815	77815	77815	77815	77815	77815	77815	77815	77815	77815	77815	77815	77815	77815	77815	77815	77815	77815	77815	77815	77815	77815	77815	77815	77815	77815	77815	77815	77815	77815	77815	77815	77815	77815
position (bp)	1431	2123	7266	769	13297	5254	245566	630679	671108	690738	474680	2644895	55776	616431	628807	726094	1017437	1306291	1657063	1686262	1721238	1749743	2026446	2281012	2332289	2365700	2467446	2478017	2544602	2989787	3014368	3058797	3151152	3188826	3329705	3531499	4164654	4218713	4225658	4357165	4387867	4491812	4499350	4548188	4775013	4957180	5144309	5151124	5159056
FDR, GWAS	2.85e-06	3.76e-11	4.21e-37	0.00043763	5.53e-06	5.85e-05	5.78e-06	3.35e-07	5.04e-07	2.29e-07	0.000549347	4.58e-05	2.68e-09	0.000351746	1.45e-15	5.91e-05	5.71e-08	3.07e-09	4.46e-08	8.42e-05	4.61e-13	7.94e-09	6.52e-06	2.41e-06	2.9e-18	0.000414894	1.78e-07	1.83e-19	0.000386142	2.27e-10	5.35e-05	0.000100497	1.32e-09	3.89e-07	4.85e-10	4.11e-05	2.37e-05	1.08e-08	2.36e-07	0.000454238	4.98e-08	4.93e-09	1.31e-08	1.84e-09	8.67e-05	4.08e-08	1e-05	9.08e-09	5.85e-07
q value, outlier	0.10071	0.00054128	0.08087	0.97783	0.049551	0.74358	0.016415	0.00025338	0.00085573	0.0030824	0.97074	0.064511	0.00025338	0.35707	0	0.043139	0.11054	0	0.0037138	0	0	0.018278	0.1337	0.01126	0	0.37397	0.037638	0	0.14552	0	0.056802	0.51417	0.00013849	0.0012108	0	0.22166	0.014457	0.0071086	0.0063865	0.95304	0	3.64e-05	8.34e-05	0.0024386	0.072224	0	0.012759	0.0081947	0.004969
reference allele	G	C	A	A	A	T	T	A	T	T	G	A	G	A	G	A	G	C	C	C	G	C	C	T	A	G	G	G	G	A	A	T	C	A	C	C	T	T	T	G	G	G	C	A	T	C	G	T	T
alternative allele	A	T	C	G	T	A	C	G	A	C	A	G	A	G	A	G	A	T	T	T	A	T	T	A	C	T	T	A	A	C	G	C	G	T	G	T	G	C	C	A	A	C	T	T	C	T	A	C	C
annotation	intergenic	intergenic	exon	NA	intron	NA	intergenic	intron	exon	intron	intergenic	intron	intergenic	intron	intergenic	intergenic	intergenic	intergenic	intergenic	intergenic	intergenic	intron	intergenic	intron	intergenic	intergenic	intergenic	intron	intergenic	intron	intergenic	intron	intron	intron	intergenic	intergenic	intergenic	intergenic	intergenic	intergenic	intergenic	intron	intron	intron	intergenic	intergenic	intron	exon	intron
dn_ds	NA	NA	ns	NA	NA	NA	NA	NA	ns	NA	NA	NA	NA	NA	NA	NA	NA	NA	NA	NA	NA	NA	NA	NA	NA	NA	NA	NA	NA	NA	NA	NA	NA	NA	NA	NA	NA	NA	NA	NA	NA	NA	NA	NA	NA	NA	NA	ns	NA
gene_id	NA	NA	Mnip_004329	NA	Mnip_010022	NA	NA	Mnip_011474	Mnip_011478	Mnip_011481	NA	Mnip_019958	NA	Mnip_022047	NA	NA	NA	NA	NA	NA	NA	Mnip_022116	NA	Mnip_022154	NA	NA	NA	Mnip_022171	NA	Mnip_022226	NA	Mnip_022235	Mnip_022241	Mnip_022241	NA	NA	NA	NA	NA	NA	NA	Mnip_022279	Mnip_022279	Mnip_022281	NA	NA	Mnip_022303	Mnip_022303	Mnip_022303
CTS_AQ_01	G	C	A	A	A	T	T	A	T	T	G	A	G	A	A	G	G	C	C	C	G	C	C	T	C	G	G	G	G	C	A	Y	C	A	G	C	T	T	T	G	G	G	C	A	T	C	G	T	T
CTS_AQ_02	G	C	A	A	A	T	T	A	T	T	N	A	G	A	A	G	G	C	C	C	G	C	C	T	C	G	G	G	G	C	A	N	C	A	G	C	T	T	T	R	G	G	C	A	T	C	G	T	T
CTS_AQ_03	G	C	A	A	W	T	T	A	T	T	G	A	G	A	A	G	G	C	N	C	G	C	C	T	C	G	G	G	G	C	R	Y	C	A	G	C	T	T	N	R	G	G	C	A	T	C	G	T	T
CTS_AQ_04	G	C	A	A	A	T	T	A	T	T	N	A	G	A	A	R	G	C	N	C	G	C	C	T	C	G	G	G	G	C	A	C	C	A	G	C	T	T	T	R	G	N	C	A	T	C	G	N	T
CTS_AQ_05	G	C	A	A	A	T	T	A	T	T	G	A	G	N	A	G	G	C	C	C	N	C	C	T	C	G	G	G	G	C	A	Y	N	A	G	C	T	T	T	R	G	G	C	A	T	C	G	Y	T
CTS_AQ_06	G	C	A	A	A	W	T	A	T	T	N	A	G	A	A	G	G	C	C	C	G	C	C	T	C	G	G	G	G	C	A	T	C	A	G	C	T	T	T	R	G	G	C	A	T	C	G	T	T
CTS_AQ_07	G	C	A	A	A	T	T	A	T	T	G	A	G	A	A	G	G	C	C	C	G	C	C	T	C	G	G	G	G	C	A	T	C	A	G	C	T	T	T	A	G	G	C	A	T	C	G	T	T
CTS_AQ_08	G	C	A	A	A	T	T	A	T	T	N	A	N	A	A	G	G	C	C	C	R	C	C	T	C	G	G	G	G	C	A	Y	C	A	G	C	T	T	T	R	G	G	C	A	T	C	G	T	T
CTS_AQ_09	G	C	A	A	A	T	T	A	T	T	G	A	G	A	A	G	G	C	C	C	G	C	C	T	C	G	G	G	G	C	A	C	C	A	G	C	T	T	T	R	G	G	C	N	T	C	G	T	T
CTS_AQ_10	G	C	A	R	A	T	T	A	T	T	G	A	G	A	A	R	G	C	C	C	G	C	C	T	C	G	G	G	G	C	A	Y	C	A	G	C	T	T	T	R	G	G	C	A	T	C	G	T	T
CTS_AQ_11	G	C	A	A	A	W	T	A	T	T	G	A	G	A	A	G	G	C	C	C	G	C	C	N	C	G	G	G	G	C	A	T	C	N	G	C	T	T	T	A	G	G	C	A	N	C	G	N	T
CTS_AQ_12	G	C	A	A	A	T	T	A	T	T	G	A	G	A	A	R	G	C	C	C	G	C	C	T	C	G	G	G	G	C	A	T	C	A	G	C	T	T	T	R	G	G	C	A	T	C	G	T	T
CTS_AQ_13	G	C	A	A	A	W	T	A	T	T	G	A	G	A	A	R	G	C	C	C	G	C	C	T	C	G	G	G	G	C	A	T	N	A	G	C	T	T	T	R	G	G	C	A	N	C	G	T	T
CTS_AQ_14	G	C	A	A	A	T	T	A	T	T	G	N	G	R	A	R	G	C	Y	C	G	C	C	T	C	G	G	G	G	C	A	T	C	N	G	C	T	T	N	R	G	G	C	A	T	C	R	T	T
CTS_AQ_15	G	C	A	A	W	W	T	A	T	T	G	A	G	A	A	R	G	C	C	C	G	C	C	T	C	G	G	G	G	C	A	T	C	A	G	C	T	T	T	R	G	G	C	A	T	C	G	N	T
CTS_AQ_16	G	C	A	A	A	W	T	A	T	T	G	A	G	A	A	R	G	C	C	C	G	C	C	T	C	G	G	G	G	C	A	T	C	A	G	C	T	T	T	R	G	G	C	A	T	C	G	T	T
CTS_AQ_17	G	C	A	N	A	T	T	A	T	T	G	A	N	A	A	G	G	C	C	C	G	C	C	T	C	G	G	G	G	C	A	Y	C	N	G	C	T	T	T	R	G	G	C	N	T	C	G	T	T
CTS_AQ_18	G	C	A	A	A	N	T	A	T	T	G	A	G	A	A	G	G	C	C	C	G	C	C	T	C	G	G	G	G	C	A	Y	C	A	G	C	T	T	T	G	G	G	C	A	T	C	G	T	T
CTS_AQ_19	G	C	A	A	A	N	T	A	T	T	G	A	G	A	A	G	G	C	C	C	G	C	C	T	C	G	G	G	G	C	A	Y	C	A	G	C	T	T	T	A	G	G	C	A	T	C	G	T	T
CTS_AQ_20	G	C	A	A	A	W	T	A	T	T	G	A	G	A	A	G	G	C	C	C	G	C	C	T	C	G	G	G	G	C	A	T	C	A	G	C	T	T	T	G	G	G	C	A	T	C	G	T	T
CTS_AQ_21	G	C	A	A	A	T	T	A	T	T	G	A	N	A	A	G	G	C	C	C	G	C	C	T	C	G	G	G	G	C	A	Y	C	A	G	C	T	T	T	A	G	G	C	A	T	C	G	T	T
KRY_AQ_22	G	C	A	A	A	T	T	A	T	T	G	A	G	A	A	G	G	C	C	C	G	C	C	W	C	G	G	G	G	C	A	Y	C	A	G	C	T	T	T	A	G	G	C	A	T	C	G	T	T
KRY_AQ_23	G	C	A	R	A	W	T	A	T	T	A	A	N	A	A	G	G	C	C	C	G	C	C	T	C	G	G	G	G	C	A	C	C	A	G	C	T	T	T	G	G	N	C	A	T	C	G	T	T
KRY_AQ_24	G	C	A	A	A	W	C	A	T	Y	N	A	G	A	A	G	G	C	C	C	G	C	C	T	M	G	G	G	G	M	A	C	C	A	G	C	T	T	T	G	G	G	C	N	Y	C	G	T	T
KRY_AQ_25	G	C	A	A	A	T	T	A	T	T	G	A	N	A	A	G	G	C	C	C	G	C	C	T	C	G	G	G	G	C	A	C	C	A	G	C	T	T	T	G	G	G	C	A	T	C	G	T	T
KRY_AQ_26	G	C	A	A	A	T	T	A	T	T	G	A	G	A	A	G	G	C	C	C	G	C	C	N	C	G	G	G	G	C	A	Y	C	A	G	C	T	T	T	G	G	G	C	A	T	C	G	T	T
KRY_AQ_27	G	C	A	A	A	N	T	A	T	T	G	A	G	A	A	G	G	C	C	C	G	C	C	W	N	G	G	G	G	C	A	C	C	A	G	C	T	T	T	G	G	G	C	A	T	C	G	T	T
KRY_AQ_28	G	C	A	R	A	T	T	A	T	T	G	A	G	A	A	N	G	C	C	C	G	C	C	T	C	G	G	G	G	C	A	C	C	A	G	C	T	T	T	G	G	G	C	A	Y	C	N	T	T
KRY_AQ_29	G	C	A	A	A	T	T	A	T	T	G	A	G	A	A	R	G	C	Y	C	G	C	C	T	C	G	G	G	G	C	A	N	C	A	G	C	T	T	N	G	G	G	N	A	T	C	G	T	T
KRY_AQ_30	G	C	A	A	A	T	N	A	T	T	G	A	G	A	A	G	G	C	C	C	G	C	C	T	C	G	G	G	G	C	A	T	C	A	G	C	T	T	T	G	G	G	C	A	T	C	G	T	T
KRY_AQ_31	G	C	A	A	A	T	T	A	T	T	G	A	G	A	A	G	G	C	C	C	G	C	C	T	C	G	G	G	G	C	A	C	C	A	G	C	T	T	T	G	G	G	C	A	T	C	G	T	T
KRY_AQ_32	G	C	A	A	A	W	T	A	T	T	G	A	G	A	A	A	G	C	C	C	G	C	C	T	C	G	G	G	G	C	A	T	C	A	G	C	T	T	T	G	G	G	C	A	T	C	G	T	T
KRY_AQ_33	G	C	A	A	A	W	T	A	T	T	N	A	G	A	A	G	G	C	C	C	G	C	C	T	C	G	G	G	G	C	A	Y	C	A	G	C	T	T	T	G	G	G	C	A	T	C	G	T	T
KRY_AQ_34	G	C	A	A	A	W	T	A	T	T	N	A	G	A	A	G	G	C	C	C	G	C	C	T	C	G	G	G	G	C	N	N	C	A	G	C	T	T	T	G	G	G	C	A	T	C	G	T	T
KRY_AQ_35	G	C	A	A	A	A	T	A	T	T	A	A	G	A	A	G	G	C	C	C	G	C	C	T	C	G	G	G	G	C	N	Y	C	A	G	C	T	T	T	G	G	G	C	A	T	C	G	T	T
KRY_AQ_36	A	Y	M	R	T	T	C	G	A	C	G	A	A	A	G	A	A	T	T	N	A	T	C	T	N	G	T	A	G	A	A	T	G	N	C	C	G	C	C	A	A	S	T	T	C	T	A	C	C
KRY_AQ_37	G	C	A	R	A	W	T	A	T	T	A	A	G	A	A	G	G	C	C	C	G	C	C	T	C	G	G	G	G	C	N	N	C	A	G	C	T	T	T	G	G	G	C	A	T	C	R	T	T
TNS_AQ_38	G	Y	N	N	W	A	Y	A	W	C	G	N	G	A	R	G	G	C	C	C	G	C	C	T	M	G	G	N	G	A	G	C	C	W	G	C	T	Y	T	R	G	G	C	A	Y	C	G	N	Y
TYM_AQ_39	G	Y	A	N	W	T	Y	A	W	Y	N	N	G	A	A	G	G	C	C	C	G	C	C	T	C	G	G	G	G	N	A	Y	C	W	G	C	T	Y	T	N	G	G	C	A	Y	C	G	T	Y
CTS_EQ_40	A	T	M	R	T	T	C	G	A	C	G	A	A	A	G	A	A	T	T	C	A	T	C	A	A	G	T	N	G	A	A	T	G	T	C	T	N	C	C	N	A	C	T	T	C	T	A	C	C
CTS_EQ_41	R	Y	M	R	W	W	Y	R	W	Y	G	A	R	N	R	R	R	Y	Y	C	R	Y	C	W	A	G	K	N	G	M	A	T	S	W	S	Y	N	N	Y	N	R	S	Y	W	Y	Y	N	Y	Y
CTS_EQ_42	R	Y	M	R	W	T	Y	R	W	Y	G	A	R	N	R	R	R	N	T	C	R	N	C	T	M	K	K	N	G	M	A	Y	S	N	S	Y	N	C	Y	N	R	S	Y	W	Y	N	R	Y	Y
CTS_EQ_43	N	Y	M	R	W	W	Y	R	N	Y	G	R	R	A	R	R	N	Y	Y	C	R	Y	Y	T	M	G	K	N	G	N	A	T	S	W	S	C	N	Y	Y	N	N	S	Y	W	Y	Y	R	Y	Y
CTS_EQ_44	N	Y	M	R	W	T	Y	R	W	Y	G	A	R	A	R	R	N	Y	Y	C	R	Y	C	W	M	G	K	N	G	M	A	T	S	W	S	Y	N	Y	Y	N	N	S	Y	W	Y	Y	R	Y	Y
CTS_EQ_45	A	T	M	R	T	W	C	G	A	C	G	A	A	N	G	A	A	T	T	C	A	T	C	N	A	N	T	N	G	A	A	T	N	W	C	T	N	C	C	N	A	C	T	N	C	T	A	N	C
CTS_EQ_46	A	T	M	R	T	W	C	G	A	C	G	A	A	R	G	A	A	T	N	C	A	T	C	N	A	G	T	N	G	A	A	T	G	T	C	T	N	C	C	N	A	S	N	T	Y	T	A	N	C
CTS_EQ_47	A	T	M	R	T	T	C	G	A	C	G	A	A	A	G	A	A	T	T	C	A	T	C	A	A	G	T	N	G	A	A	T	G	T	C	T	N	C	C	N	A	C	T	T	C	T	A	C	C
CTS_EQ_48	A	T	M	R	T	T	C	G	A	C	G	A	A	A	G	A	A	T	T	C	A	T	C	A	A	G	T	N	G	A	A	T	G	W	C	T	N	C	C	N	A	C	T	N	C	T	A	C	C
CTS_EQ_49	A	T	M	N	T	W	C	G	A	C	G	A	A	A	G	A	A	T	T	N	A	T	C	W	A	G	T	N	G	A	A	T	G	T	C	Y	N	C	C	N	A	C	T	T	C	T	A	C	C
CTS_EQ_50	A	T	M	R	T	T	C	G	A	C	G	A	A	A	G	R	A	T	T	T	A	T	C	W	A	G	T	N	G	A	A	T	G	T	C	Y	N	C	C	N	A	C	T	T	C	T	R	Y	C
CTS_EQ_51	R	Y	M	R	W	W	Y	R	N	Y	G	R	R	A	N	R	R	Y	Y	C	R	Y	Y	T	M	G	K	N	G	M	A	T	S	W	S	C	N	Y	Y	N	R	S	Y	W	Y	Y	R	Y	Y
CTS_EQ_52	A	T	M	R	T	W	C	G	A	C	G	R	A	A	G	A	A	T	T	N	R	Y	C	A	A	G	T	N	G	A	A	T	G	T	C	Y	N	C	C	N	A	C	T	T	C	T	A	C	C
CTS_EQ_53	R	Y	M	R	W	N	Y	R	W	Y	G	R	R	A	R	R	R	Y	Y	C	A	Y	C	W	M	G	K	N	G	M	A	T	S	W	S	Y	N	C	Y	N	R	S	Y	W	Y	Y	R	Y	Y
CTS_EQ_54	R	Y	M	R	W	W	Y	R	W	Y	G	A	R	A	R	R	R	Y	Y	C	R	N	C	W	M	G	K	N	G	M	A	T	S	W	S	Y	N	Y	Y	N	N	S	Y	W	Y	N	R	Y	Y
CTS_EQ_55	R	Y	M	A	W	T	Y	R	W	Y	G	A	R	R	G	R	R	Y	N	T	N	Y	Y	N	N	N	N	N	R	A	R	T	S	N	S	Y	N	Y	Y	N	R	S	Y	W	Y	Y	N	N	Y
CTS_EQ_56	N	Y	M	R	W	W	Y	R	W	Y	G	R	R	A	R	A	N	N	Y	N	R	Y	C	W	M	G	K	N	G	M	A	Y	S	W	S	Y	N	Y	Y	N	R	S	Y	W	Y	Y	R	Y	Y
CTS_EQ_57	N	Y	M	R	W	W	Y	R	W	Y	G	R	R	N	R	A	R	Y	Y	C	R	Y	C	W	M	G	K	N	G	M	A	Y	S	W	S	Y	N	Y	Y	N	R	S	Y	W	Y	Y	R	Y	Y
CTS_EQ_58	R	Y	M	R	W	T	Y	R	W	Y	G	A	R	R	G	R	R	Y	T	T	A	Y	C	W	M	G	N	N	N	A	R	T	S	W	S	Y	N	Y	Y	N	R	S	Y	W	Y	Y	R	Y	Y
CTS_EQ_59	A	T	M	R	T	W	C	G	A	C	G	R	A	A	G	A	A	T	T	C	A	T	C	A	A	G	T	N	G	A	A	T	G	T	C	T	N	C	C	N	A	N	T	N	C	T	N	C	C
CTS_EQ_60	R	Y	M	R	W	N	Y	R	N	Y	G	R	R	R	G	R	R	Y	T	T	A	Y	Y	W	M	G	K	N	G	M	A	T	S	W	S	Y	N	Y	Y	N	R	S	Y	W	Y	Y	R	Y	Y
CTS_EQ_61	R	Y	M	R	W	W	C	R	W	Y	G	R	R	R	G	R	R	T	T	T	N	Y	Y	T	M	K	N	N	R	A	R	T	S	W	S	C	N	Y	Y	N	R	S	Y	W	Y	Y	R	Y	Y
CTS_EQ_62	R	Y	M	N	W	W	Y	R	W	Y	G	N	R	R	G	R	R	T	T	T	A	Y	Y	T	M	N	K	N	R	A	R	T	S	W	S	C	N	Y	Y	N	R	S	Y	W	Y	Y	N	Y	Y
CTS_EQ_63	R	Y	M	R	W	W	Y	R	W	Y	G	R	R	R	G	R	N	T	T	T	A	Y	Y	T	M	K	K	N	R	A	R	T	S	W	S	C	N	Y	Y	N	N	S	Y	W	Y	Y	R	Y	Y
KRY_EQ_64	G	Y	M	A	W	A	Y	R	N	Y	G	R	R	R	G	A	N	N	Y	T	N	Y	Y	W	A	G	N	A	R	A	G	T	S	W	C	C	K	Y	Y	A	R	S	Y	W	Y	N	R	Y	Y
KRY_EQ_65	A	T	M	N	T	W	C	G	N	C	G	R	A	A	G	A	N	N	T	C	R	T	C	T	A	K	N	A	G	A	R	T	G	N	C	C	G	C	C	A	A	C	T	T	C	T	A	C	C
KRY_EQ_66	A	T	M	R	T	A	C	G	N	C	N	R	A	A	G	A	N	N	T	N	R	T	C	T	A	N	N	A	G	A	N	T	G	T	C	C	G	C	C	A	A	C	T	T	C	T	A	C	C
KRY_EQ_67	G	Y	M	A	W	A	Y	R	N	Y	G	R	R	R	G	A	N	N	Y	T	A	Y	Y	W	A	G	N	A	R	A	G	T	S	W	C	C	K	N	Y	A	R	S	Y	W	Y	N	R	Y	Y
KRY_EQ_68	G	Y	M	A	W	A	Y	R	N	Y	G	R	R	R	G	R	N	N	Y	T	A	Y	Y	W	A	G	N	A	R	A	G	T	S	W	C	C	K	N	Y	R	R	S	Y	W	Y	Y	R	Y	Y
KRY_EQ_69	R	Y	M	R	W	A	Y	R	N	Y	G	R	R	A	N	A	N	N	Y	C	R	N	C	T	A	K	N	N	G	M	A	N	S	W	S	C	K	N	Y	R	R	S	Y	W	Y	Y	R	Y	N
KRY_EQ_70	R	Y	M	R	W	A	Y	R	N	Y	G	R	R	R	G	R	N	N	Y	T	A	Y	Y	W	A	K	N	A	R	A	G	T	S	W	C	C	K	Y	Y	N	R	G	Y	W	Y	Y	R	Y	Y
KRY_EQ_71	N	Y	M	A	W	A	Y	R	N	Y	G	A	R	R	G	A	N	N	Y	T	A	Y	Y	W	A	G	N	A	R	A	G	T	S	W	S	C	K	Y	Y	R	R	S	Y	W	Y	Y	R	Y	Y
KRY_EQ_72	G	Y	M	A	W	W	Y	R	N	Y	G	R	R	R	G	A	N	N	Y	T	A	Y	Y	N	A	G	N	A	A	A	G	T	S	W	S	C	K	C	Y	R	R	S	Y	W	Y	Y	R	Y	Y
KRY_EQ_73	G	Y	M	A	W	N	Y	R	N	Y	G	R	R	R	G	R	N	N	Y	T	A	Y	Y	W	A	G	N	A	A	A	G	T	S	W	C	C	K	C	Y	R	R	S	Y	W	Y	Y	R	Y	Y
KRY_EQ_74	R	Y	M	R	W	A	Y	R	N	Y	G	R	R	R	G	A	N	N	Y	T	A	Y	Y	W	A	N	N	A	R	A	G	T	N	A	C	C	K	Y	Y	A	R	S	Y	W	Y	Y	R	T	Y
KRY_EQ_75	R	Y	M	A	W	W	Y	R	N	Y	G	A	R	R	G	A	N	N	Y	T	A	Y	Y	W	A	G	N	A	R	A	G	T	S	W	S	C	K	C	Y	R	R	S	Y	W	Y	Y	R	Y	Y
KRY_EQ_76	G	Y	M	A	W	A	Y	R	N	Y	G	R	R	R	G	R	N	N	Y	T	A	Y	Y	W	A	G	N	A	R	A	G	T	S	T	C	C	K	Y	Y	R	R	S	Y	W	Y	Y	R	Y	Y
KRY_EQ_77	R	Y	M	A	W	A	Y	R	N	Y	N	R	R	R	G	A	N	N	Y	T	A	Y	Y	W	A	G	N	A	R	A	G	T	S	W	C	Y	K	Y	Y	A	R	S	Y	W	Y	Y	R	Y	Y
KRY_EQ_78	R	Y	M	A	W	A	Y	R	N	Y	G	A	R	R	G	A	N	N	Y	T	A	Y	Y	W	A	K	N	A	R	M	G	T	S	W	C	C	K	C	Y	R	R	S	Y	W	Y	Y	R	Y	Y
KRY_EQ_79	R	Y	M	A	W	A	Y	R	N	Y	G	A	R	R	G	A	N	N	Y	T	A	Y	Y	W	A	K	N	A	R	M	G	T	S	N	C	C	K	C	Y	R	R	S	Y	W	Y	Y	R	Y	Y
KRY_EQ_80	R	T	M	A	N	A	C	G	N	C	G	R	A	A	G	A	N	N	T	N	A	T	C	T	A	N	N	A	G	M	N	T	G	T	C	C	G	C	C	A	A	C	T	T	C	T	A	C	C
KRY_EQ_81	R	Y	M	A	W	A	Y	R	N	Y	N	R	R	R	G	R	N	N	Y	T	N	Y	Y	W	A	N	N	A	A	A	G	T	S	A	C	Y	K	C	Y	R	R	N	Y	W	Y	Y	R	N	Y
KRY_EQ_82	R	Y	M	A	W	N	Y	R	N	Y	G	R	R	R	G	A	N	N	Y	T	R	Y	Y	T	M	K	N	A	R	A	G	Y	S	W	C	C	K	Y	Y	R	R	S	Y	A	Y	Y	R	Y	Y
KRY_EQ_83	N	Y	M	A	W	A	Y	R	N	Y	G	A	R	R	G	A	N	N	Y	T	A	Y	Y	W	A	K	N	A	R	M	G	T	S	W	C	C	K	Y	Y	A	R	S	Y	W	Y	Y	R	Y	Y
KRY_EQ_84	R	Y	M	A	W	A	Y	R	N	Y	G	A	R	R	G	A	N	N	Y	T	A	Y	Y	W	A	K	N	A	R	A	G	T	S	W	C	C	K	Y	Y	A	R	S	Y	W	Y	Y	R	Y	Y
KRY_EQ_85	R	Y	M	A	W	A	Y	R	N	Y	N	A	R	R	G	A	N	N	Y	T	A	Y	Y	W	A	K	N	A	R	M	G	T	S	A	C	C	K	N	Y	A	R	S	Y	W	Y	Y	R	Y	Y
TNS_EQ_86	G	Y	A	N	W	N	C	R	N	C	N	R	R	R	G	A	G	Y	Y	Y	R	C	T	A	N	K	G	A	N	A	G	Y	S	W	C	C	N	T	T	G	R	S	Y	W	Y	Y	R	Y	Y
TNS_EQ_87	G	T	A	N	T	N	C	G	N	C	R	R	A	A	G	A	G	T	C	C	G	Y	C	A	A	G	G	A	N	A	A	T	G	T	C	C	N	Y	C	R	A	S	T	W	C	T	A	C	C
TNS_EQ_88	G	Y	A	N	W	N	Y	A	N	C	G	R	R	R	G	R	G	Y	Y	Y	R	C	C	W	A	K	G	A	N	A	R	T	S	W	C	C	N	N	Y	G	N	S	Y	A	Y	Y	R	Y	Y
TNS_EQ_89	N	Y	A	N	W	N	Y	R	N	C	G	R	R	R	G	R	G	Y	Y	Y	R	C	C	W	A	K	G	A	N	A	R	T	S	W	C	C	N	T	T	G	R	S	Y	W	Y	Y	R	Y	Y
TNS_EQ_90	G	T	A	N	T	N	C	R	N	C	G	R	A	A	G	A	G	T	T	C	G	C	C	A	N	G	G	A	N	A	A	T	G	T	C	C	N	Y	Y	G	A	C	T	W	C	T	R	C	C
TNS_EQ_91	G	Y	A	N	W	N	C	R	N	C	G	R	R	R	G	R	G	Y	Y	N	R	C	N	A	A	K	G	A	N	A	G	T	S	W	C	C	N	T	T	G	R	S	Y	W	Y	Y	R	Y	Y
TNS_EQ_92	G	Y	A	N	W	N	Y	R	N	N	G	R	R	R	G	R	G	Y	Y	Y	R	C	Y	A	A	K	G	A	N	A	G	T	S	W	S	C	N	T	T	G	R	S	Y	W	Y	Y	R	Y	Y
TNS_EQ_93	G	Y	A	N	W	N	C	R	N	C	G	R	R	R	G	R	G	Y	Y	Y	R	C	Y	A	A	K	G	A	N	A	G	T	S	W	C	C	N	T	N	G	R	S	Y	W	Y	Y	R	Y	Y
TNS_EQ_94	G	Y	A	N	W	N	Y	R	N	N	G	R	R	A	N	R	G	Y	Y	C	R	C	C	A	A	K	K	N	N	A	G	T	S	W	C	C	N	T	T	G	R	S	Y	W	Y	Y	R	Y	Y
TNS_EQ_95	G	Y	A	N	W	N	Y	R	N	C	G	R	N	A	R	R	G	Y	Y	C	R	C	C	A	A	N	K	N	N	A	G	T	C	W	C	C	N	T	T	G	R	S	Y	W	Y	Y	N	Y	Y
TNS_EQ_96	G	Y	A	N	W	N	Y	A	N	C	G	R	R	A	R	R	G	Y	C	C	R	C	T	A	M	G	G	A	N	A	G	T	S	W	C	C	N	T	T	G	R	S	Y	W	Y	Y	R	Y	Y
[truncated: 6 more columns]
