# Supplementary material
Source: Research Square preprint supplement (doi:10.21203/rs.3.rs-10017901/v1)
Supplement: Supplementary file 4 [file 6b21a5692a7af40a269bd37b.xlsx]

## Sheet: Table S4
Table S4. Scaffold orders and orientations for the Mg4-syntenic pseudochromosomes.
query	order	scaffold_name	scaffold_length	Orientation
male genome (reference)
	1	Scaffold_77646	2800433	+
	2	Scaffold_77672	3450514	-
	3	Scaffold_77113	236248	-
	4	Scaffold_77487	856696	+
	5	Scaffold_76831	158111	+
	6	Scaffold_76296	117273	-
	7	Scaffold_77279	451147	-
	8	Scaffold_76090	106215	+
	9	Scaffold_77357	403337	+
	10	Scaffold_77815	6132866	+
	11	Scaffold_76968	165208	-
	12	Scaffold_77517	912232	+
alate queen genome
	1	Scaffold_21	6331870	-
	2	Scaffold_133464	53725	-
	3	Scaffold_128781	64140	+
	4	Scaffold_170	542583	-
	5	Scaffold_55	1047941	+
	6	Scaffold_130461	64593	+
	7	Scaffold_131870	50880	+
	8	Scaffold_52	913302	+
	9	Scaffold_128801	97136	-
	10	Scaffold_131472	157646	+
	11	Scaffold_132158	90334	+
	12	Scaffold_19	5394449	+
	13	Scaffold_58	403171	+
	14	Scaffold_202	445392	+
ergatiod queen genome
	1	Scaffold_69	2787936	+
	2	Scaffold_228	3451553	-
	3	Scaffold_134241	305148	-
	4	Scaffold_131181	32010	-
	5	Scaffold_274	1268029	+
	6	Scaffold_125251	27126	+
	7	Scaffold_118818	26226	-
	8	Scaffold_130810	41427	+
	9	Scaffold_127638	48757	-
	10	Scaffold_133645	43480	+
	11	Scaffold_132895	168388	-
	12	Scaffold_128756	49651	+
	13	Scaffold_130496	24097	+
	14	Scaffold_127016	23916	-
	15	Scaffold_132777	226241	+
	16	Scaffold_128058	34754	-
	17	Scaffold_128032	28618	-
	18	Scaffold_130640	28432	+
	19	Scaffold_132824	28372	+
	20	Scaffold_122255	25889	+
	21	Scaffold_131267	29438	+
	22	Scaffold_106281	26475	+
	23	Scaffold_133907	48858	-
	24	Scaffold_133	1511367	-
	25	Scaffold_104	3224143	-
	26	Scaffold_134672	56439	+
	27	Scaffold_133622	23899	-
	28	Scaffold_134163	38418	+
	29	Scaffold_134280	30796	-
	30	Scaffold_126	3047167	-
	31	Scaffold_133953	29696	-
	32	Scaffold_127886	23805	-
