# Supplementary material
Source: Research Square preprint supplement (doi:10.21203/rs.3.rs-10017901/v1)
Supplement: Supplementary file 5 [file 8c10b68aa61d90a0aa0cdcc1.xlsx]

## Sheet: Table S1
Table S1. Genome assembly statistics for M. nipponica
	num_contigs	shortest	longest	mean	N50	total_bases	total size	BUSCO
male (reference)	16787	1000	10718116	16417.3	2209112	275597648	275.60 Mb	C:97.1%[S:95.6%,D:1.5%],F:1.3,M1.7%,n:1658, BUSCO3.0.2_insecta_odb9
alate queen (AQ)	27965	500	9183503	10427.3	4466640	291598699	205.06 Mb	C:98.6%[S:97.5%,D:1.1%],F:0.4%,M:1.0%,n:1367, BUSCO5.1.2_insecta_odb10
ergatoid queen (EQ)	29770	500	16000096	10389.4	3269967	309293717	219.12 Mb	C:98.1%[S:96.6%,D:1.5%],F:0.7%,M:1.2%,n:1367, BUSCO5.1.2_insecta_odb10
