# Supplementary material
Source: Research Square preprint supplement (doi:10.21203/rs.3.rs-10017901/v1)
Supplement: Supplementary file 6 [file d2ab1ec1ce0b473a54c9ee06.xlsx]

## Sheet: Table S3
Table S3. Results of Bayescan outlier analysis.
SNP_ID	scaffold	position (bp)	probability	log10(PO)	q value	alpha	Fst
55_55	92	8325	0.0090018	-2.04174	0.972126	0.00033877	0.043989
89_14	101	12528	0.0094019	-2.0227	0.96924	-0.0019165	0.043891
158_42	101	51808	0.010202	-1.9869	0.96013	-0.0037416	0.043849
209_2	101	93858	0.0094019	-2.0227	0.96924	0.00018386	0.043947
210_49	101	94008	0.011802	-1.9229	0.91146	-0.00078294	0.043943
212_106	101	94131	0.0076015	-2.1158	0.97674	0.0028193	0.044114
322_7	101	175105	0.010802	-1.9618	0.94796	-0.0035199	0.043921
389_55	101	229210	0.0094019	-2.0227	0.96924	-0.00326	0.043831
397_82	101	232814	0.011202	-1.9458	0.93712	-0.0046832	0.043788
430_65	101	292740	0.0094019	-2.0227	0.96924	0.0028794	0.044137
468_87	101	335244	0.010802	-1.9618	0.94796	-0.0051162	0.043792
499_153	101	363521	0.0088018	-2.0516	0.97316	-0.0027851	0.043905
527_34	101	381710	0.0088018	-2.0516	0.97316	-0.0030891	0.043896
540_6	101	392863	0.012603	-1.894	0.856	-0.0052472	0.043829
548_52	101	399912	0.010002	-1.9955	0.96326	-0.0036619	0.043822
576_21	101	424288	0.010202	-1.9869	0.96013	-0.006208	0.043783
635_262	101	467879	0.0074015	-2.1275	0.97698	-0.0010068	0.043889
640_4	101	469361	0.0090018	-2.0417	0.97213	-0.003347	0.043815
687_46	101	506690	0.010602	-1.97	0.95304	-0.0020442	0.04395
718_35	101	539532	0.0062012	-2.2048	0.97774	-0.0026734	0.043858
826_38	101	638883	0.010602	-1.97	0.95304	-0.0030536	0.043902
843_8	101	652494	0.010602	-1.97	0.95304	-0.0055488	0.043807
851_2	101	657839	0.0080016	-2.0933	0.97597	-0.0028812	0.043855
889_241	101	686425	0.0082016	-2.0825	0.97547	-0.0023112	0.043846
930_223	101	713104	0.010002	-1.9955	0.96326	-0.0044186	0.043834
980_40	101	837177	0.0094019	-2.0227	0.96924	-0.0015759	0.043897
1097_61	101	954432	0.010602	-1.97	0.95304	0.0072351	0.044459
1163_47	101	1000819	0.010002	-1.9955	0.96326	-0.0037787	0.043837
1253_5	101	1104514	0.0082016	-2.0825	0.97547	0.0039718	0.0442
1305_25	101	1140979	0.0092018	-2.0321	0.97074	-0.0016225	0.04394
1469_105	104	6686	0.010202	-1.9869	0.96013	-0.005598	0.043776
1481_90	108	3274	0.010202	-1.9869	0.96013	-0.0042154	0.043841
1484_165	108	4611	0.011402	-1.938	0.9297	-0.0043949	0.043849
1522_12	117	4773	0.0088018	-2.0516	0.97316	-0.0027373	0.043867
1527_92	118	458	0.011402	-1.938	0.9297	-0.002427	0.043944
1531_67	118	4459	0.0086017	-2.0617	0.97407	-0.00076561	0.043944
1533_8	118	19164	0.012603	-1.894	0.856	0.01056	0.044615
1535_24	118	31680	0.0096019	-2.0135	0.96762	-0.00083874	0.043953
1545_29	118	44624	0.009802	-2.0044	0.96577	-0.002901	0.043885
1573_227	118	92551	0.010602	-1.97	0.95304	0.0031446	0.044175
1630_20	118	209909	0.0096019	-2.0135	0.96762	0.0044543	0.044235
1650_82	118	258006	0.010602	-1.97	0.95304	0.0021554	0.044092
1661_22	118	274887	0.0080016	-2.0933	0.97597	-0.0013753	0.043912
1664_58	118	275497	0.010402	-1.9783	0.95666	-0.0052955	0.043819
1690_65	118	334374	0.0086017	-2.0617	0.97407	-0.00045138	0.043944
1822_23	118	625604	0.0090018	-2.0417	0.97213	-0.0052568	0.043774
1877_63	118	723212	0.0092018	-2.0321	0.97074	-0.0024646	0.043866
1895_29	118	788622	0.011402	-1.938	0.9297	-0.001781	0.043965
1913_199	118	835566	0.010602	-1.97	0.95304	-0.0067849	0.043766
1952_8	663	363	0.010402	-1.9783	0.95666	0.0060896	0.044345
1975_35	7538	1614	0.0086017	-2.0617	0.97407	-0.0013887	0.043926
2035_91	28375	339	0.0094019	-2.0227	0.96924	0.0012935	0.044068
2039_29	28375	1372	0.0078016	-2.1044	0.97638	0.0015298	0.044042
2040_23	28375	1431	0.42969	-0.12296	0.10071	0.69606	0.099894
2077_67	30994	1411	0.0086017	-2.0617	0.97407	0.0014265	0.044036
2174_13	32772	225	0.010202	-1.9869	0.96013	-0.0028441	0.043876
2176_0	32772	568	0.012803	-1.8871	0.83958	-0.0096222	0.043657
2250_30	33716	1500	0.009802	-2.0044	0.96577	-0.0017715	0.043919
2257_169	33909	3300	0.0086017	-2.0617	0.97407	-0.004619	0.04386
2364_92	34603	109	0.0086017	-2.0617	0.97407	0.0005919	0.043984
2399_38	34636	3260	0.0090018	-2.0417	0.97213	-0.0033719	0.043827
2407_112	34674	6039	0.0092018	-2.0321	0.97074	-0.0029141	0.043848
2417_73	34688	5286	0.0068014	-2.1644	0.97751	0.0008487	0.043981
2418_28	34688	5394	0.0092018	-2.0321	0.97074	-0.0033607	0.043863
2447_22	35131	1207	0.0074015	-2.1275	0.97698	0.0003547	0.044015
2507_205	36535	283	0.0096019	-2.0135	0.96762	-0.0026351	0.043883
2594_134	37325	2013	0.011202	-1.9458	0.93712	0.0044376	0.044228
2619_69	37638	6747	0.010402	-1.9783	0.95666	0.004883	0.044291
2628_14	37656	1568	0.0090018	-2.0417	0.97213	-0.004314	0.043835
2652_217	37751	460	0.010802	-1.9618	0.94796	0.0095949	0.044633
2675_33	37890	4765	0.0084017	-2.072	0.97491	0.0031349	0.044108
2683_53	37988	1498	0.0096019	-2.0135	0.96762	-0.002944	0.043898
2686_25	37989	599	0.009802	-2.0044	0.96577	-0.0036444	0.043861
2701_17	38061	578	0.012002	-1.9155	0.89977	-0.0037042	0.043919
2725_24	38138	2800	0.010002	-1.9955	0.96326	0.0016066	0.04405
2795_78	38422	2244	0.0076015	-2.1158	0.97674	0.0012242	0.044032
2807_12	38439	3060	0.0082016	-2.0825	0.97547	-0.0048523	0.043805
2823_97	38664	613	0.0088018	-2.0516	0.97316	0.0024675	0.044104
2863_0	38732	236	0.013203	-1.8736	0.80772	0.00516	0.044308
2875_61	38768	4680	0.012803	-1.8871	0.83958	-0.0030534	0.043887
2884_15	38789	446	0.010202	-1.9869	0.96013	0.0060701	0.044413
2891_31	38814	5476	0.010402	-1.9783	0.95666	0.0051215	0.044232
3031_37	39592	4753	0.0086017	-2.0617	0.97407	-0.0011277	0.043952
3107_148	39714	2565	0.009802	-2.0044	0.96577	-0.003523	0.043845
3109_23	39716	293	0.010202	-1.9869	0.96013	-0.0021257	0.043912
3111_1	39719	1734	0.0088018	-2.0516	0.97316	-0.0048268	0.043792
3133_36	39755	918	0.011802	-1.9229	0.91146	-0.006658	0.043762
3163_88	39786	14143	0.012202	-1.9082	0.88849	0.010338	0.044672
3202_60	39868	842	0.0094019	-2.0227	0.96924	-0.0029979	0.043873
3256_49	39973	7677	0.0074015	-2.1275	0.97698	-0.00095624	0.043903
3260_86	39973	10750	0.010802	-1.9618	0.94796	-0.0053442	0.043788
3303_9	40180	2832	0.010202	-1.9869	0.96013	-0.0028806	0.043871
3327_100	40264	863	0.011402	-1.938	0.9297	0.00129	0.044099
3345_84	40294	1378	0.0090018	-2.0417	0.97213	0.0046843	0.044261
3369_43	40375	2393	0.011402	-1.938	0.9297	-0.002452	0.043912
3374_226	40402	1007	0.0080016	-2.0933	0.97597	1.39e-05	0.044077
3397_245	40524	14050	0.011002	-1.9537	0.94359	-0.0016893	0.043942
3461_114	40646	3409	0.011602	-1.9304	0.92034	-0.0045319	0.043925
3520_37	41305	1423	0.012202	-1.9082	0.88849	-0.0022543	0.04394
3526_25	41333	10112	0.010202	-1.9869	0.96013	-0.0024171	0.043895
3529_19	41333	10335	0.0084017	-2.072	0.97491	-0.0022374	0.043901
3557_94	41474	470	0.0090018	-2.0417	0.97213	0.0034546	0.044208
3706_213	42188	2967	0.011202	-1.9458	0.93712	-0.0018698	0.043948
3736_13	42322	287	0.010002	-1.9955	0.96326	-0.0034581	0.043846
3777_19	42391	87	0.0088018	-2.0516	0.97316	-0.0037453	0.043854
3785_91	42416	2261	0.0080016	-2.0933	0.97597	0.00068589	0.043989
3809_58	42464	1710	0.0090018	-2.0417	0.97213	-0.0035569	0.043842
3820_20	42477	162	0.0088018	-2.0516	0.97316	-0.0008223	0.043942
3834_82	42499	1060	0.0090018	-2.0417	0.97213	-0.0051221	0.043791
3910_124	42796	8671	0.010602	-1.97	0.95304	-0.0073575	0.043727
3917_2	42806	269	0.0090018	-2.0417	0.97213	-0.0040092	0.043855
4026_115	43122	1470	0.010802	-1.9618	0.94796	-0.0046066	0.043867
4086_228	43224	3660	0.0090018	-2.0417	0.97213	-0.00070166	0.043948
4130_38	43296	7351	0.0096019	-2.0135	0.96762	-0.0032839	0.043855
4172_180	43482	928	0.013003	-1.8803	0.82577	0.0081712	0.044519
4193_256	43858	1793	0.010202	-1.9869	0.96013	-0.0011729	0.04391
4218_28	44151	565	0.0086017	-2.0617	0.97407	-0.0037317	0.043805
4352_14	45874	3922	0.0080016	-2.0933	0.97597	0.00079863	0.043978
4358_10	45936	170	0.010202	-1.9869	0.96013	-0.0043534	0.043816
4449_33	47103	133	0.010202	-1.9869	0.96013	-0.0037335	0.04389
4488_120	47381	124	0.011602	-1.9304	0.92034	-0.0044661	0.043862
4500_14	47477	2153	0.0090018	-2.0417	0.97213	0.0011488	0.044062
4549_16	47926	11899	0.0078016	-2.1044	0.97638	-0.0035285	0.043843
4553_12	47926	13108	0.009802	-2.0044	0.96577	-0.0054593	0.043781
4799_124	48124	4228	0.011202	-1.9458	0.93712	-0.0052009	0.04382
4831_16	48131	4407	0.010402	-1.9783	0.95666	-0.0037948	0.043873
4850_58	48136	17198	0.010602	-1.97	0.95304	-0.0050491	0.043816
4906_9	52589	545	0.0078016	-2.1044	0.97638	0.0032265	0.044166
4957_26	53231	736	0.011002	-1.9537	0.94359	-0.0034435	0.043884
4968_5	53247	460	0.011202	-1.9458	0.93712	-0.0032454	0.043861
4975_24	53308	1339	0.010602	-1.97	0.95304	-0.0018806	0.043922
5006_272	53530	2780	0.0094019	-2.0227	0.96924	-0.0015099	0.043958
5015_38	53586	575	0.0072014	-2.1394	0.97721	-0.00055553	0.043899
5122_75	54330	168	0.0094019	-2.0227	0.96924	-0.0029499	0.043858
5134_58	54379	2280	0.0084017	-2.072	0.97491	-0.0016063	0.043891
5148_43	54414	849	0.010002	-1.9955	0.96326	-0.0011068	0.043917
5150_157	54414	1056	0.0096019	-2.0135	0.96762	-0.0061579	0.043768
5155_41	54440	2541	0.011002	-1.9537	0.94359	-0.005007	0.043809
5332_298	55010	2177	0.0090018	-2.0417	0.97213	-0.0030202	0.043868
5341_54	55013	766	0.011002	-1.9537	0.94359	-0.0041547	0.043874
5387_1	55087	2571	0.014603	-1.8292	0.72669	0.012764	0.044809
5527_1	55380	2147	0.011002	-1.9537	0.94359	-0.0019471	0.04388
5533_31	55391	1474	0.0088018	-2.0516	0.97316	0.00054841	0.044031
5727_123	56058	1668	0.013003	-1.8803	0.82577	0.010126	0.044679
5747_78	56070	4912	0.0094019	-2.0227	0.96924	-0.00244	0.043893
5763_176	56137	341	0.010802	-1.9618	0.94796	-0.0023685	0.043921
5774_17	56161	1118	0.014403	-1.8353	0.73682	0.015029	0.045013
5796_9	56221	10070	0.0076015	-2.1158	0.97674	-0.0027804	0.04385
5860_18	56309	5588	0.011602	-1.9304	0.92034	-0.0029812	0.043917
5927_31	56566	2679	0.010402	-1.9783	0.95666	-0.0065975	0.04377
6010_107	57131	2717	0.011402	-1.938	0.9297	-0.0044898	0.043832
6042_147	57324	3582	0.010002	-1.9955	0.96326	-0.0030353	0.043887
6069_313	57385	1005	0.011002	-1.9537	0.94359	-0.005363	0.043791
6075_12	57417	584	0.0094019	-2.0227	0.96924	-0.0034154	0.043893
6087_99	57433	3012	0.010002	-1.9955	0.96326	-0.00079372	0.043969
6103_5	57447	2427	0.011002	-1.9537	0.94359	-0.0028928	0.043911
6124_27	57454	6008	0.0084017	-2.072	0.97491	-0.0038592	0.043811
6132_21	57456	8937	0.011602	-1.9304	0.92034	-0.0041277	0.043841
6150_107	57464	611	0.009802	-2.0044	0.96577	0.0013706	0.044092
6156_26	57467	1138	0.0090018	-2.0417	0.97213	0.0058988	0.044355
6195_233	57486	816	0.010002	-1.9955	0.96326	-0.0025183	0.043896
6214_128	57489	5339	0.0072014	-2.1394	0.97721	0.0024747	0.044135
6261_84	57608	778	0.010202	-1.9869	0.96013	-0.0058053	0.043779
6282_15	57815	3423	0.011202	-1.9458	0.93712	-0.0046777	0.043819
6304_36	57963	178	0.011202	-1.9458	0.93712	0.0058504	0.044381
6376_125	58558	6466	0.0096019	-2.0135	0.96762	-0.00060135	0.043965
6386_119	58615	6074	0.0084017	-2.072	0.97491	-0.0039441	0.043815
6398_33	58632	2168	0.0094019	-2.0227	0.96924	-0.00454	0.043811
6405_241	58634	2458	0.0082016	-2.0825	0.97547	0.0016169	0.044039
6463_5	58779	105	0.0068014	-2.1644	0.97751	-0.0027098	0.043838
6510_52	58786	4858	0.0092018	-2.0321	0.97074	-0.0040369	0.043821
6542_13	58792	10288	0.009802	-2.0044	0.96577	0.0047317	0.044229
6574_12	58799	11847	0.0078016	-2.1044	0.97638	-0.00099255	0.04394
6584_110	58800	2696	0.010202	-1.9869	0.96013	-0.0041662	0.04387
6606_15	58802	22111	0.0080016	-2.0933	0.97597	-0.0019481	0.043879
6626_4	58804	11353	0.0080016	-2.0933	0.97597	-0.0025883	0.043898
6639_30	58805	10495	0.014003	-1.8477	0.75369	-0.0038838	0.043865
6730_13	58821	7839	0.0082016	-2.0825	0.97547	-0.0027886	0.043819
6731_95	58821	7971	0.0084017	-2.072	0.97491	-0.0017794	0.043888
6735_154	58822	3491	0.0078016	-2.1044	0.97638	0.00085108	0.044042
6848_36	58972	916	0.011002	-1.9537	0.94359	-0.0041404	0.043858
6880_84	59046	1726	0.010802	-1.9618	0.94796	0.0014563	0.044031
6904_80	59063	2090	0.0094019	-2.0227	0.96924	-0.0027021	0.043922
6944_137	59104	3630	0.009802	-2.0044	0.96577	-0.00027298	0.043989
6997_78	59252	2507	0.010202	-1.9869	0.96013	-0.0035827	0.04392
7000_15	59255	366	0.012402	-1.9011	0.87279	-0.0051306	0.043811
7026_2	59294	614	0.0088018	-2.0516	0.97316	0.0072458	0.044364
7055_134	59318	670	0.011802	-1.9229	0.91146	-0.0032608	0.043884
7060_27	59319	2706	0.011402	-1.938	0.9297	-0.0049946	0.043845
7063_20	59319	4348	0.0084017	-2.072	0.97491	-0.0022716	0.043866
7158_73	59434	1950	0.009802	-2.0044	0.96577	-0.00073052	0.04393
7175_66	59494	148	0.0058012	-2.234	0.97778	-0.001643	0.043855
7224_31	59808	1909	0.012402	-1.9011	0.87279	-0.0049819	0.043836
7343_18	60726	2810	0.012803	-1.8871	0.83958	-0.0035591	0.043906
7379_36	60771	5307	0.013003	-1.8803	0.82577	-0.0060802	0.04382
7395_5	60806	757	0.010202	-1.9869	0.96013	-0.0034967	0.043814
7398_41	60841	3433	0.0080016	-2.0933	0.97597	-0.00090092	0.0439
7417_171	60849	6194	0.0092018	-2.0321	0.97074	-0.0025271	0.043919
7421_75	60858	498	0.010602	-1.97	0.95304	-0.0049585	0.043787
7440_60	60955	12789	0.020404	-1.6813	0.57053	0.023728	0.045721
7447_29	60968	5621	0.009802	-2.0044	0.96577	-0.0025165	0.043877
7452_70	60971	10776	0.0080016	-2.0933	0.97597	0.002285	0.04408
7466_8	60981	2659	0.010002	-1.9955	0.96326	-0.0051941	0.043776
7550_143	61060	327	0.014203	-1.8414	0.74358	0.014239	0.044947
7596_25	61122	903	0.0080016	-2.0933	0.97597	-0.0015447	0.043926
7602_97	61122	5974	0.0070014	-2.1518	0.97739	-0.00028946	0.043926
7731_10	61299	4368	0.011802	-1.9229	0.91146	-0.0014756	0.043967
7753_23	61309	4793	0.0066013	-2.1775	0.97761	-0.0022522	0.043828
7813_20	61367	3662	0.0066013	-2.1775	0.97761	0.0023947	0.044044
7846_6	61417	530	0.011202	-1.9458	0.93712	-0.0052487	0.043821
7876_52	61458	48	0.0084017	-2.072	0.97491	-0.00093306	0.04395
7891_41	61474	2366	0.0070014	-2.1518	0.97739	-0.0020094	0.043846
7894_11	61475	4486	0.010802	-1.9618	0.94796	-0.0039339	0.043854
7920_11	61491	464	0.0090018	-2.0417	0.97213	-0.0015961	0.043935
7923_119	61494	3708	0.011602	-1.9304	0.92034	-0.0039232	0.04386
7937_6	61521	2980	0.014403	-1.8353	0.73682	0.012623	0.044821
7939_6	61521	3332	0.010602	-1.97	0.95304	0.0034346	0.044181
7982_226	61609	2372	0.0080016	-2.0933	0.97597	0.00207	0.044067
8001_38	61645	3036	0.011602	-1.9304	0.92034	0.00037503	0.044127
8101_200	61862	1337	0.011402	-1.938	0.9297	-0.0023868	0.043891
8107_119	61865	913	0.0072014	-2.1394	0.97721	-0.0027205	0.043868
8147_198	61917	2619	0.011002	-1.9537	0.94359	-0.0034998	0.043893
8175_74	61929	381	0.0086017	-2.0617	0.97407	-0.0017387	0.043931
8190_11	61949	4036	0.018204	-1.7319	0.60877	0.021011	0.045475
8247_139	61989	887	0.0090018	-2.0417	0.97213	-0.005397	0.043768
8269_314	62029	3943	0.011002	-1.9537	0.94359	0.0014321	0.044075
8383_93	62081	1924	0.011802	-1.9229	0.91146	0.0066689	0.04439
8403_104	62086	1962	0.0094019	-2.0227	0.96924	0.00090409	0.04402
8451_97	62099	17184	0.04861	-1.2916	0.29016	0.064966	0.048914
8452_127	62100	206	0.0096019	-2.0135	0.96762	-0.00027859	0.044009
8462_6	62101	2152	0.011002	-1.9537	0.94359	0.0026446	0.044174
8475_153	62105	3695	0.010802	-1.9618	0.94796	-0.0031721	0.043887
8490_280	62111	360	0.018004	-1.7368	0.61803	0.019338	0.045386
8496_80	62115	517	0.0084017	-2.072	0.97491	-8.82e-05	0.043965
8537_105	62146	1862	0.0090018	-2.0417	0.97213	-0.0019291	0.043933
8539_76	62148	846	0.0086017	-2.0617	0.97407	0.00031719	0.044008
8561_77	62168	545	0.011202	-1.9458	0.93712	-0.0037033	0.043803
8568_214	62168	6567	0.0078016	-2.1044	0.97638	-0.00065614	0.043942
8578_8	62172	6867	0.0068014	-2.1644	0.97751	-0.0010559	0.043878
8620_125	62273	1943	0.0088018	-2.0516	0.97316	-0.0016433	0.043912
8629_199	62283	1047	0.0084017	-2.072	0.97491	0.00039878	0.043995
8706_58	62329	1604	0.010202	-1.9869	0.96013	-0.0030584	0.043914
8762_54	62364	497	0.0084017	-2.072	0.97491	-0.00011489	0.043938
8780_27	62375	5130	0.0092018	-2.0321	0.97074	0.00072868	0.043966
8848_18	62428	3941	0.0082016	-2.0825	0.97547	0.0016346	0.044095
8875_91	62438	3840	0.009802	-2.0044	0.96577	-0.0016517	0.043931
8919_71	62471	4983	0.0082016	-2.0825	0.97547	0.0026313	0.044109
8941_34	62490	2788	0.0080016	-2.0933	0.97597	-0.0029049	0.043828
9003_152	62517	4599	0.009802	-2.0044	0.96577	-0.0011461	0.043937
9015_6	62518	2470	0.011602	-1.9304	0.92034	-0.0036697	0.043873
9056_62	62526	15656	0.012202	-1.9082	0.88849	-0.0044642	0.043837
9081_64	62531	9566	0.010002	-1.9955	0.96326	-0.0012568	0.043976
9135_28	62549	1475	0.010402	-1.9783	0.95666	-0.00072928	0.04396
9209_181	62648	4125	0.012603	-1.894	0.856	-0.0029641	0.043928
9254_42	62679	8229	0.0070014	-2.1518	0.97739	-0.0013232	0.043942
9278_15	62695	5021	0.0090018	-2.0417	0.97213	0.00021154	0.044011
9322_28	62782	1431	0.0096019	-2.0135	0.96762	-0.0050788	0.043802
9346_6	62852	1327	0.0078016	-2.1044	0.97638	-0.00067249	0.043929
9404_19	63001	4821	0.010802	-1.9618	0.94796	0.0046937	0.044287
9456_1	63089	2461	0.011202	-1.9458	0.93712	0.0071992	0.044358
9499_133	63253	2123	0.9964	2.442	0.00054128	1.7565	0.19112
9516_135	63328	429	0.0084017	-2.072	0.97491	-0.0026957	0.043878
9535_122	63371	1679	0.010402	-1.9783	0.95666	-0.0035242	0.043886
9579_72	63525	1438	0.010802	-1.9618	0.94796	-0.0045658	0.043856
9587_139	63531	185	0.009802	-2.0044	0.96577	0.0071282	0.044389
9720_26	64037	953	0.0080016	-2.0933	0.97597	-0.00055529	0.043917
9755_63	64266	15545	0.0078016	-2.1044	0.97638	0.0018776	0.044064
9779_207	64340	1170	0.0076015	-2.1158	0.97674	0.00066015	0.044008
9840_9	64572	1556	0.012202	-1.9082	0.88849	0.0092378	0.044548
9845_42	64577	1099	0.0094019	-2.0227	0.96924	-0.0047396	0.043795
9896_74	64758	7289	0.0074015	-2.1275	0.97698	0.00057421	0.043954
9999_50	64975	2680	0.0076015	-2.1158	0.97674	-0.00073705	0.043908
10090_26	65109	2652	0.0092018	-2.0321	0.97074	-0.004339	0.043851
10123_43	65166	2245	0.011202	-1.9458	0.93712	-0.0009177	0.044016
10142_104	65166	16686	0.0094019	-2.0227	0.96924	-0.0034996	0.043847
10148_84	65185	1072	0.0088018	-2.0516	0.97316	0.001144	0.044057
10157_60	65195	2931	0.011202	-1.9458	0.93712	-0.0013747	0.043983
10196_9	65245	4041	0.010002	-1.9955	0.96326	-0.004569	0.043795
10266_109	65301	2137	0.0084017	-2.072	0.97491	0.006018	0.044278
10294_15	65314	6135	0.011002	-1.9537	0.94359	-0.0012275	0.043947
10298_21	65328	423	0.009802	-2.0044	0.96577	0.0027252	0.044137
10300_75	65328	1047	0.0080016	-2.0933	0.97597	-0.0044727	0.043826
10360_84	65364	13792	0.010402	-1.9783	0.95666	-0.002789	0.043923
10387_83	65395	880	0.0084017	-2.072	0.97491	-0.0010186	0.043907
10399_154	65408	10932	0.0082016	-2.0825	0.97547	-0.0031871	0.04383
10436_14	65443	2228	0.011202	-1.9458	0.93712	-0.0026067	0.043925
10483_77	65493	3369	0.011002	-1.9537	0.94359	-0.0049211	0.043802
10486_193	65493	3602	0.0082016	-2.0825	0.97547	-0.0026708	0.043844
10497_0	65503	349	0.0072014	-2.1394	0.97721	-0.00064936	0.043905
10542_10	65564	3993	0.0086017	-2.0617	0.97407	0.0044193	0.04418
10559_10	65585	1419	0.012603	-1.894	0.856	-0.0046278	0.043866
10615_42	65618	1898	0.009802	-2.0044	0.96577	-0.0013733	0.043935
10633_112	65630	10422	0.0096019	-2.0135	0.96762	-0.005243	0.043777
10645_73	65638	5713	0.0090018	-2.0417	0.97213	-0.0027952	0.043907
10664_173	65676	3650	0.012402	-1.9011	0.87279	-0.0042128	0.043891
10737_268	65735	45	0.0094019	-2.0227	0.96924	-0.0029557	0.043909
10745_11	65737	1539	0.012803	-1.8871	0.83958	-0.0035719	0.043857
10765_44	65746	3254	0.0086017	-2.0617	0.97407	-0.0026264	0.043866
10769_22	65749	1093	0.0090018	-2.0417	0.97213	-0.0019785	0.043897
10771_127	65750	1551	0.012402	-1.9011	0.87279	0.006634	0.044386
10777_53	65750	3412	0.0088018	-2.0516	0.97316	-0.0024629	0.043885
10807_140	65802	4690	0.0080016	-2.0933	0.97597	-0.0016272	0.043946
10928_14	65896	4151	0.0084017	-2.072	0.97491	-0.0049423	0.043766
10939_13	65918	3327	0.010002	-1.9955	0.96326	0.0059704	0.044291
11003_76	65959	5194	0.0092018	-2.0321	0.97074	-0.002344	0.043914
11041_5	66000	1776	0.0096019	-2.0135	0.96762	0.005078	0.044345
11143_56	66100	2202	0.0092018	-2.0321	0.97074	-0.0036588	0.043834
11279_23	66188	808	0.0096019	-2.0135	0.96762	-0.0041678	0.043855
11361_39	66272	150	0.0068014	-2.1644	0.97751	-0.0039499	0.043865
11384_25	66280	407	0.0080016	-2.0933	0.97597	-0.0016163	0.043875
11407_26	66301	4597	0.0096019	-2.0135	0.96762	-0.0025449	0.043862
11428_12	66305	2093	0.012603	-1.894	0.856	0.011356	0.044716
11453_138	66322	9641	0.0072014	-2.1394	0.97721	-0.0013285	0.043918
11462_119	66325	539	0.010402	-1.9783	0.95666	-0.0020015	0.043942
11486_122	66347	2235	0.0094019	-2.0227	0.96924	-0.0010302	0.043981
11560_217	66377	8321	0.0094019	-2.0227	0.96924	-0.00086453	0.0439
11576_15	66384	2381	0.011002	-1.9537	0.94359	-0.0030661	0.043904
11599_27	66397	6296	0.010202	-1.9869	0.96013	-0.0021424	0.043944
11698_96	66558	3429	0.0066013	-2.1775	0.97761	-0.004085	0.04379
11777_12	66656	10833	0.0092018	-2.0321	0.97074	0.0031831	0.044123
11780_15	66659	343	0.0094019	-2.0227	0.96924	-0.0024427	0.043899
11794_88	66677	1596	0.009802	-2.0044	0.96577	-0.0046047	0.043797
11800_2	66683	2443	0.011402	-1.938	0.9297	-0.0022295	0.043977
11829_165	66706	7302	0.010602	-1.97	0.95304	-0.0053382	0.043795
11876_16	66743	3185	0.0074015	-2.1275	0.97698	1.18e-05	0.043966
11925_74	66827	928	0.012002	-1.9155	0.89977	0.00059629	0.044071
11947_17	66866	394	0.0080016	-2.0933	0.97597	0.0054821	0.044316
11979_3	66890	6698	0.012603	-1.894	0.856	-0.0039999	0.043869
11988_10	66902	1649	0.010402	-1.9783	0.95666	-0.0045177	0.043778
12009_138	66947	1982	0.0076015	-2.1158	0.97674	-0.001078	0.043921
12084_297	67050	5142	0.011202	-1.9458	0.93712	-0.0019765	0.043961
12115_250	67214	3659	0.012803	-1.8871	0.83958	-0.0066517	0.043756
12188_159	67342	7266	0.53871	0.067377	0.08087	0.88357	0.11538
12354_9	67508	1973	0.0092018	-2.0321	0.97074	0.0067101	0.044372
12380_79	67529	2988	0.011202	-1.9458	0.93712	6.5e-05	0.044023
12439_9	67586	1329	0.0096019	-2.0135	0.96762	-0.0035276	0.043861
12442_24	67586	1715	0.025605	-1.5804	0.45922	0.029864	0.046222
12463_29	67593	907	0.012002	-1.9155	0.89977	-0.0033501	0.043899
12540_54	67660	2096	0.0088018	-2.0516	0.97316	0.0028072	0.044082
12603_48	67713	157	0.0094019	-2.0227	0.96924	-0.0015949	0.043955
12624_84	67742	4971	0.015803	-1.7943	0.66071	0.015012	0.045031
12661_70	67766	788	0.0094019	-2.0227	0.96924	0.0018087	0.044079
12669_107	67776	2212	0.010002	-1.9955	0.96326	-0.0057034	0.04378
12676_7	67786	21	0.0088018	-2.0516	0.97316	0.0061288	0.044415
12742_76	67839	2258	0.010202	-1.9869	0.96013	-0.0042902	0.043865
12795_57	67906	2056	0.010602	-1.97	0.95304	-0.0033863	0.043898
12837_44	67924	5775	0.012202	-1.9082	0.88849	0.0092267	0.044564
12893_76	67956	6085	0.013603	-1.8604	0.77662	0.011616	0.044774
12907_19	67957	2545	0.0088018	-2.0516	0.97316	-0.002879	0.043878
12909_84	67957	2709	0.0078016	-2.1044	0.97638	-0.0043904	0.043818
12930_215	67969	139	0.011802	-1.9229	0.91146	-0.0057835	0.043794
13016_145	68015	1589	0.0082016	-2.0825	0.97547	-0.002861	0.043894
13073_80	68060	3770	0.009802	-2.0044	0.96577	-0.0051822	0.043832
13092_12	68085	5330	0.011402	-1.938	0.9297	-0.0035523	0.04387
13096_230	68085	6332	0.0086017	-2.0617	0.97407	-0.0026506	0.043905
13170_51	68149	422	0.015003	-1.8173	0.7073	0.008587	0.044542
13229_31	68212	1034	0.0084017	-2.072	0.97491	-0.0034681	0.043849
13249_12	68233	4534	0.0086017	-2.0617	0.97407	0.0030588	0.044169
13362_102	68319	1249	0.0078016	-2.1044	0.97638	-0.002286	0.043906
13383_207	68334	1835	0.010202	-1.9869	0.96013	-0.0049437	0.043842
13462_9	68357	10268	0.011002	-1.9537	0.94359	-0.0052236	0.043833
13499_35	68382	4007	0.0096019	-2.0135	0.96762	-0.0038477	0.043842
13571_37	68471	6382	0.010602	-1.97	0.95304	-0.0028282	0.043924
13591_7	68519	2861	0.0092018	-2.0321	0.97074	-0.0018	0.043905
13609_47	68523	2534	0.009802	-2.0044	0.96577	-0.0030828	0.043864
13672_174	68606	327	0.0078016	-2.1044	0.97638	0.0013293	0.044023
13740_5	68808	1016	0.010402	-1.9783	0.95666	-0.00070201	0.043943
13754_56	68839	8678	0.010002	-1.9955	0.96326	-0.0022231	0.043934
13830_16	69009	302	0.0088018	-2.0516	0.97316	-0.0036438	0.043838
13860_90	69034	12825	0.010002	-1.9955	0.96326	-0.0048561	0.043823
13875_102	69052	364	0.009802	-2.0044	0.96577	-0.0036473	0.043851
13891_85	69059	998	0.010402	-1.9783	0.95666	-0.0035338	0.043853
13951_120	69114	2401	0.0094019	-2.0227	0.96924	-0.0018113	0.043968
13987_70	69137	2061	0.009802	-2.0044	0.96577	-0.00096055	0.043973
14100_266	69212	7131	0.009802	-2.0044	0.96577	0.00097188	0.043968
14192_26	69273	809	0.011202	-1.9458	0.93712	-0.0049904	0.043813
14198_92	69275	2998	0.011002	-1.9537	0.94359	0.0045644	0.044266
14214_29	69290	1343	0.010602	-1.97	0.95304	-0.0036789	0.043868
14237_29	69302	10944	0.011402	-1.938	0.9297	-0.00052433	0.043971
14280_180	69316	1943	0.010602	-1.97	0.95304	-0.0056387	0.043848
14288_59	69318	3998	0.013403	-1.8669	0.7887	-0.0051925	0.043868
14320_72	69327	5555	0.011202	-1.9458	0.93712	0.0055099	0.044259
14385_51	69355	113	0.011602	-1.9304	0.92034	-0.0028248	0.04391
14411_15	69382	3359	0.0092018	-2.0321	0.97074	-0.0044136	0.043819
14442_45	69397	318	0.0094019	-2.0227	0.96924	-0.0065549	0.043758
14470_164	69412	541	0.0082016	-2.0825	0.97547	-0.0038381	0.043789
14515_27	69427	4583	0.009802	-2.0044	0.96577	-0.0053187	0.043823
14560_38	69455	3063	0.0074015	-2.1275	0.97698	-0.002785	0.04383
14690_31	69590	1920	0.010002	-1.9955	0.96326	0.0018067	0.04411
14712_59	69612	2706	0.0072014	-2.1394	0.97721	0.00012867	0.043962
14733_132	69620	10019	0.010402	-1.9783	0.95666	-0.0043584	0.04386
14978_33	69765	110	0.011202	-1.9458	0.93712	-0.0052183	0.043847
15031_46	69779	7340	0.0088018	-2.0516	0.97316	0.0025826	0.044155
15115_18	69878	2146	0.0094019	-2.0227	0.96924	0.0050731	0.044271
15202_64	69969	715	0.0082016	-2.0825	0.97547	-0.0010732	0.043957
15203_17	69969	803	0.011802	-1.9229	0.91146	-0.0047314	0.04384
15386_109	70061	6001	0.013203	-1.8736	0.80772	0.0043359	0.044318
15415_0	70093	3053	0.010202	-1.9869	0.96013	-0.0041286	0.04384
15506_10	70168	9335	0.0092018	-2.0321	0.97074	0.0013393	0.044072
15557_20	70236	96	0.011002	-1.9537	0.94359	0.00449	0.044264
15584_216	70251	5290	0.011202	-1.9458	0.93712	-0.00094842	0.044023
15594_2	70262	1616	0.010002	-1.9955	0.96326	-0.00097229	0.043952
15613_70	70287	1962	0.012202	-1.9082	0.88849	0.0042487	0.044263
15619_71	70291	647	0.010402	-1.9783	0.95666	-0.0012704	0.043934
15657_13	70334	3511	0.0072014	-2.1394	0.97721	-0.00081423	0.043908
15741_57	70406	1298	0.0084017	-2.072	0.97491	-0.0032877	0.043802
15819_69	70474	720	0.0080016	-2.0933	0.97597	-0.001212	0.043915
15844_100	70502	934	0.010602	-1.97	0.95304	-0.0040182	0.043836
15888_33	70551	1741	0.0082016	-2.0825	0.97547	-0.0026156	0.043851
15890_36	70551	3414	0.024405	-1.6018	0.49362	0.03176	0.046348
15898_218	70558	9375	0.0082016	-2.0825	0.97547	0.0042862	0.044193
15926_152	70563	2845	0.0094019	-2.0227	0.96924	-0.0051827	0.043772
15938_70	70580	1284	0.0084017	-2.072	0.97491	0.0020009	0.044076
16125_12	70698	3516	0.0084017	-2.072	0.97491	-0.00089829	0.043965
16160_69	70713	5507	0.010202	-1.9869	0.96013	-0.0039372	0.043811
16191_0	70726	5850	0.0062012	-2.2048	0.97774	-4.16e-06	0.043925
16209_66	70731	372	0.0096019	-2.0135	0.96762	-0.0012538	0.043927
16219_35	70746	301	0.012202	-1.9082	0.88849	-0.0003868	0.044105
16262_94	70764	1277	0.011002	-1.9537	0.94359	-0.0055155	0.043821
16363_81	70803	11949	0.0074015	-2.1275	0.97698	-0.0018174	0.043896
16380_166	70819	6293	0.0086017	-2.0617	0.97407	-0.0032314	0.043866
16417_79	70841	971	0.010402	-1.9783	0.95666	-0.0052754	0.043788
16560_3	70914	13343	0.011202	-1.9458	0.93712	-0.0037054	0.043876
16586_61	70938	3243	0.0094019	-2.0227	0.96924	-0.0014393	0.043925
16609_182	70948	4113	0.011602	-1.9304	0.92034	-0.0033292	0.043852
16623_51	70952	4325	0.009802	-2.0044	0.96577	0.0040583	0.04429
16699_64	70992	10336	0.0094019	-2.0227	0.96924	-0.0037971	0.043844
16706_113	70993	1643	0.0084017	-2.072	0.97491	-0.0023424	0.043863
16708_258	70993	2805	0.010802	-1.9618	0.94796	-0.0034829	0.043916
16711_31	70993	3781	0.0092018	-2.0321	0.97074	-0.0043385	0.043788
16716_89	70994	6920	0.010202	-1.9869	0.96013	-0.0067234	0.043787
16720_62	70997	2664	0.010602	-1.97	0.95304	-0.0056069	0.043818
16836_6	71076	2239	0.0094019	-2.0227	0.96924	-0.0050591	0.043767
16982_23	71127	19382	0.0094019	-2.0227	0.96924	0.00085803	0.044
16990_52	71130	647	0.010002	-1.9955	0.96326	-0.0047859	0.04382
17001_8	71141	4232	0.0096019	-2.0135	0.96762	-0.0041028	0.043798
17060_208	71173	263	0.0070014	-2.1518	0.97739	-0.0027248	0.043876
17110_73	71202	3732	0.009802	-2.0044	0.96577	-0.0035372	0.043825
17115_78	71204	4318	0.013203	-1.8736	0.80772	-0.0054187	0.043823
17125_43	71206	5328	0.012002	-1.9155	0.89977	-0.0013285	0.043978
17223_24	71253	1672	0.0096019	-2.0135	0.96762	-0.0028281	0.043928
17274_33	71309	1913	0.0092018	-2.0321	0.97074	-0.0044647	0.043815
17285_20	71315	6721	0.0092018	-2.0321	0.97074	-0.0024642	0.043885
17288_88	71315	7239	0.011002	-1.9537	0.94359	0.00458	0.044321
17295_171	71331	4662	0.012402	-1.9011	0.87279	0.0099503	0.044606
17332_151	71389	3517	0.012002	-1.9155	0.89977	-0.0049455	0.043826
17458_15	71496	408	0.0094019	-2.0227	0.96924	0.00030366	0.044016
17476_82	71504	4538	0.011202	-1.9458	0.93712	0.0061624	0.044301
17481_28	71505	2554	0.011602	-1.9304	0.92034	-0.0056371	0.043805
17515_13	71522	5308	0.0096019	-2.0135	0.96762	-0.003569	0.043853
17563_134	71549	1440	0.0088018	-2.0516	0.97316	-0.00059986	0.043996
17575_42	71561	1397	0.0094019	-2.0227	0.96924	-0.0021868	0.043901
17643_10	71600	2636	0.0084017	-2.072	0.97491	-0.0046847	0.043828
17653_48	71608	4520	0.011402	-1.938	0.9297	-0.0032499	0.043896
17790_78	71688	3378	0.010402	-1.9783	0.95666	-0.0038903	0.043858
17915_152	71748	27849	0.013203	-1.8736	0.80772	-0.0058126	0.043846
17932_97	71749	57561	0.010602	-1.97	0.95304	-0.0021704	0.043907
17950_28	71753	4499	0.0092018	-2.0321	0.97074	-0.0017658	0.043877
18016_34	71789	1780	0.010402	-1.9783	0.95666	-0.0023464	0.043952
18078_45	71853	12725	0.010002	-1.9955	0.96326	-0.0063835	0.043745
18104_73	71880	8538	0.011402	-1.938	0.9297	-0.0030325	0.043874
18125_6	71910	3374	0.011402	-1.938	0.9297	-0.0050954	0.043845
18138_154	71931	3955	0.011802	-1.9229	0.91146	-0.0030076	0.043861
18214_137	71990	382	0.0070014	-2.1518	0.97739	0.0010883	0.043992
18244_193	72045	2738	0.0084017	-2.072	0.97491	-0.0017176	0.043908
18249_213	72045	13910	0.010602	-1.97	0.95304	-0.0057534	0.043788
18256_0	72061	4660	0.011002	-1.9537	0.94359	0.0002679	0.044063
18274_162	72078	184	0.014603	-1.8292	0.72669	0.0085451	0.044585
18462_87	72197	7382	0.0090018	-2.0417	0.97213	-0.0021716	0.043891
18463_29	72197	7845	0.0092018	-2.0321	0.97074	0.003091	0.044129
18538_65	72214	5935	0.010602	-1.97	0.95304	0.0031368	0.044186
18539_34	72214	6041	0.011002	-1.9537	0.94359	-0.0022803	0.043884
18560_149	72229	3336	0.010602	-1.97	0.95304	-0.0058535	0.043754
18581_31	72240	4880	0.010202	-1.9869	0.96013	-0.0029741	0.043871
18662_27	72289	527	0.010002	-1.9955	0.96326	-0.0013635	0.043992
18884_1	72368	6326	0.0086017	-2.0617	0.97407	-0.00068656	0.043926
19084_11	72495	7678	0.0096019	-2.0135	0.96762	0.0012116	0.044026
19181_31	72574	5078	0.010402	-1.9783	0.95666	-0.0027657	0.043903
19185_197	72575	2761	0.012002	-1.9155	0.89977	-0.0039259	0.043833
19221_43	72591	2615	0.011402	-1.938	0.9297	-0.0042213	0.043841
19230_42	72592	2035	0.010602	-1.97	0.95304	-0.0035882	0.04383
19247_35	72599	1283	0.0090018	-2.0417	0.97213	-0.0026333	0.043884
19280_58	72620	2717	0.011202	-1.9458	0.93712	-0.0027435	0.04392
19306_1	72631	4178	0.009802	-2.0044	0.96577	-0.00067352	0.043983
19353_154	72661	10900	0.009802	-2.0044	0.96577	-0.0044487	0.043822
19356_25	72661	11225	0.010002	-1.9955	0.96326	0.00057842	0.044033
19485_49	72685	7793	0.011202	-1.9458	0.93712	-0.0027022	0.043917
19495_69	72700	2040	0.011602	-1.9304	0.92034	0.0072822	0.044449
19509_38	72726	9395	0.0084017	-2.072	0.97491	-0.00076311	0.043994
19612_131	72790	13196	0.0088018	-2.0516	0.97316	0.0061224	0.044301
19614_15	72793	345	0.010002	-1.9955	0.96326	-0.0057332	0.043769
19662_103	72828	5857	0.010802	-1.9618	0.94796	-0.00076903	0.043962
19667_28	72831	4132	0.010202	-1.9869	0.96013	0.0041886	0.044207
19737_139	72854	28524	0.010602	-1.97	0.95304	0.0051306	0.044347
19738_21	72854	28691	0.009802	-2.0044	0.96577	0.0028897	0.044127
19776_43	72871	14334	0.0090018	-2.0417	0.97213	-0.0018821	0.043888
19835_1	72931	938	0.010002	-1.9955	0.96326	-0.0041158	0.043846
19899_80	72948	16366	0.010002	-1.9955	0.96326	-0.00081487	0.043959
19902_41	72948	24873	0.0090018	-2.0417	0.97213	0.0039105	0.044235
19958_1	72984	3759	0.010202	-1.9869	0.96013	-0.0034029	0.043849
19991_9	72991	2815	0.0096019	-2.0135	0.96762	-3.6e-05	0.043982
20029_263	73002	862	0.011202	-1.9458	0.93712	-0.0048242	0.043797
20052_19	73011	4338	0.0084017	-2.072	0.97491	-0.00081867	0.043923
20064_110	73019	6534	0.009802	-2.0044	0.96577	-0.00039089	0.043969
20084_68	73023	1041	0.010402	-1.9783	0.95666	-0.0054457	0.043812
20100_36	73041	4637	0.010002	-1.9955	0.96326	0.0032269	0.044178
20171_311	73116	115	0.012002	-1.9155	0.89977	-0.0045314	0.043837
20224_18	73157	4657	0.010402	-1.9783	0.95666	-0.003476	0.043894
20246_42	73161	3571	0.010602	-1.97	0.95304	-0.00042395	0.044017
20248_242	73161	3862	0.0094019	-2.0227	0.96924	0.0045667	0.044237
20271_11	73169	16318	0.0084017	-2.072	0.97491	-0.0021343	0.043886
20294_168	73179	2495	0.012202	-1.9082	0.88849	0.0082049	0.044539
20307_188	73190	4188	0.010602	-1.97	0.95304	-0.0061935	0.043824
20315_47	73196	5617	0.012803	-1.8871	0.83958	0.0067338	0.04444
20347_94	73203	2279	0.0096019	-2.0135	0.96762	0.0026141	0.04413
20390_198	73218	4614	0.012002	-1.9155	0.89977	-0.0043172	0.043803
20409_10	73226	12893	0.0094019	-2.0227	0.96924	0.0044911	0.044217
20429_137	73234	1108	0.011002	-1.9537	0.94359	0.0070031	0.044417
20488_18	73247	2357	0.010802	-1.9618	0.94796	-0.0042331	0.043832
20519_3	73260	5656	0.0094019	-2.0227	0.96924	0.0027301	0.044112
20544_166	73266	6636	0.010402	-1.9783	0.95666	-0.0066391	0.043787
20602_32	73295	12488	0.0084017	-2.072	0.97491	-0.0012423	0.043956
20792_17	73357	18157	0.0076015	-2.1158	0.97674	0.0011264	0.043961
20799_61	73359	8831	0.009802	-2.0044	0.96577	-0.00083157	0.043973
20894_31	73375	19651	0.013203	-1.8736	0.80772	0.0073782	0.04442
20897_64	73375	20202	0.009802	-2.0044	0.96577	-0.0047854	0.043811
20950_84	73389	14400	0.011402	-1.938	0.9297	0.003354	0.044242
20979_4	73397	4966	0.014003	-1.8477	0.75369	0.010188	0.044594
21052_21	73430	5086	0.0084017	-2.072	0.97491	0.0013854	0.044041
21053_40	73430	5154	0.011002	-1.9537	0.94359	-0.00042471	0.043961
21065_3	73444	6722	0.010402	-1.9783	0.95666	-0.0051515	0.043788
21076_93	73449	3155	0.0090018	-2.0417	0.97213	0.0011642	0.044015
21111_275	73476	396	0.0092018	-2.0321	0.97074	-0.0032511	0.043853
21144_14	73485	2155	0.010202	-1.9869	0.96013	-0.0038076	0.043861
21219_34	73533	4537	0.010402	-1.9783	0.95666	-1.58e-06	0.044035
21247_5	73543	709	0.0086017	-2.0617	0.97407	-0.002121	0.043906
21283_10	73554	5546	0.0070014	-2.1518	0.97739	-0.0026718	0.043851
21376_22	73599	1858	0.009802	-2.0044	0.96577	-0.0023731	0.043889
21452_114	73626	4250	0.0082016	-2.0825	0.97547	-0.0011217	0.043968
21491_0	73638	1	0.0096019	-2.0135	0.96762	-0.0053102	0.043775
21501_0	73643	5340	0.0094019	-2.0227	0.96924	0.0024923	0.044139
21549_51	73667	6308	0.0094019	-2.0227	0.96924	-0.0041882	0.043783
21556_52	73681	972	0.0082016	-2.0825	0.97547	0.002934	0.044099
21662_107	73763	4433	0.012402	-1.9011	0.87279	-0.0024383	0.043956
21667_6	73769	568	0.010602	-1.97	0.95304	-0.0052112	0.043815
21670_19	73769	4536	0.0088018	-2.0516	0.97316	-0.0040603	0.043884
21708_19	73793	136	0.010202	-1.9869	0.96013	-0.0029688	0.043885
21715_27	73795	11374	0.012002	-1.9155	0.89977	-0.0025939	0.043922
21771_250	73806	76015	0.023005	-1.6281	0.52848	0.026684	0.046008
21777_6	73806	80392	0.011002	-1.9537	0.94359	-0.00036145	0.044025
21795_136	73809	4861	0.0084017	-2.072	0.97491	0.00078845	0.044031
21820_86	73812	6108	0.010602	-1.97	0.95304	0.0050586	0.044317
21846_13	73819	9666	0.0094019	-2.0227	0.96924	-0.0050745	0.043813
21873_15	73831	9515	0.010002	-1.9955	0.96326	-0.0041364	0.043919
21904_5	73848	4821	0.010002	-1.9955	0.96326	-0.0059903	0.043753
21930_61	73853	43603	0.011802	-1.9229	0.91146	-0.0051195	0.043841
21932_204	73853	43962	0.012002	-1.9155	0.89977	-0.0035648	0.043841
21944_109	73855	6907	0.0092018	-2.0321	0.97074	-0.00095638	0.043962
21963_15	73857	5026	0.009802	-2.0044	0.96577	-0.00063339	0.043996
21964_126	73857	40713	0.0094019	-2.0227	0.96924	-0.005108	0.043854
22067_25	73882	2248	0.010602	-1.97	0.95304	-0.0039209	0.043837
22069_34	73883	6263	0.012202	-1.9082	0.88849	-0.0048206	0.04386
22167_86	73920	3555	0.011802	-1.9229	0.91146	0.006294	0.044293
22194_65	73924	5694	0.010602	-1.97	0.95304	1.14e-05	0.043993
22267_48	73974	5640	0.0086017	-2.0617	0.97407	-0.0057373	0.043786
22350_21	74026	1060	0.0080016	-2.0933	0.97597	-0.0053124	0.043783
22419_42	74060	1022	0.0078016	-2.1044	0.97638	-0.0024387	0.043892
22490_38	74137	3192	0.0082016	-2.0825	0.97547	-0.0055146	0.043769
22500_34	74150	5276	0.011402	-1.938	0.9297	-0.0039503	0.043876
22650_27	74187	2828	0.0096019	-2.0135	0.96762	-0.00066889	0.043917
22661_107	74193	15152	0.0084017	-2.072	0.97491	-0.00097434	0.043952
22728_122	74220	6321	0.0076015	-2.1158	0.97674	0.0027042	0.044106
22729_231	74220	6681	0.009802	-2.0044	0.96577	0.005578	0.044249
22746_22	74226	10048	0.0088018	-2.0516	0.97316	-0.0037839	0.043795
22842_117	74304	9318	0.0070014	-2.1518	0.97739	-0.0033722	0.043818
22905_1	74335	769	0.005201	-2.2816	0.97783	0.0036456	0.044159
22906_35	74335	985	0.0078016	-2.1044	0.97638	0.0022784	0.04407
22969_131	74391	2415	0.0094019	-2.0227	0.96924	-0.0050489	0.043751
23008_51	74401	5060	0.0082016	-2.0825	0.97547	-0.00092284	0.043934
23045_28	74408	25785	0.0090018	-2.0417	0.97213	0.00032772	0.04398
23108_41	74424	48	0.0096019	-2.0135	0.96762	-0.0015215	0.04395
23148_15	74431	6042	0.010002	-1.9955	0.96326	-0.0027525	0.043873
23158_151	74436	1829	0.0070014	-2.1518	0.97739	-0.0025378	0.043865
23190_16	74445	4090	0.011802	-1.9229	0.91146	0.0025225	0.044193
23195_36	74446	23132	0.011002	-1.9537	0.94359	-0.0058493	0.043817
23203_91	74449	11776	0.010402	-1.9783	0.95666	-0.00026146	0.044054
23205_42	74451	536	0.011602	-1.9304	0.92034	-0.0056881	0.043778
23239_16	74461	4950	0.0084017	-2.072	0.97491	0.0002352	0.044022
23389_67	74519	6163	0.0096019	-2.0135	0.96762	0.0049945	0.044266
23402_129	74532	2546	0.010202	-1.9869	0.96013	0.0013293	0.044064
23452_2	74562	6317	0.0066013	-2.1775	0.97761	0.00034978	0.044022
23458_79	74567	7492	0.011602	-1.9304	0.92034	-0.0064551	0.043855
23463_243	74570	2842	0.010602	-1.97	0.95304	-0.0013126	0.043966
23488_55	74585	2835	0.016803	-1.7672	0.6325	0.015384	0.045117
23490_7	74586	3151	0.022605	-1.6359	0.53755	0.024986	0.04574
23587_141	74628	1122	0.012002	-1.9155	0.89977	0.008388	0.044556
23666_84	74664	1462	0.010602	-1.97	0.95304	-0.0041691	0.043818
23733_39	74702	6491	0.0072014	-2.1394	0.97721	-0.0019941	0.043864
23793_32	74706	21686	0.009802	-2.0044	0.96577	-0.0040343	0.043829
23822_31	74716	8253	0.0078016	-2.1044	0.97638	-0.001457	0.043907
23831_38	74716	17679	0.011002	-1.9537	0.94359	-0.0041775	0.043873
23981_45	74784	3495	0.010202	-1.9869	0.96013	-0.0020047	0.043912
24041_115	74804	1454	0.012803	-1.8871	0.83958	-0.0062173	0.043815
24141_90	74870	697	0.011802	-1.9229	0.91146	-0.0039075	0.04384
24229_42	74912	2966	0.011402	-1.938	0.9297	-0.00093101	0.043964
24262_60	74920	1839	0.011802	-1.9229	0.91146	-0.0048767	0.04381
24290_102	74922	36592	0.009802	-2.0044	0.96577	-0.0010631	0.043985
24337_3	74931	38453	0.022805	-1.632	0.53306	0.023222	0.045649
24340_244	74935	789	0.010202	-1.9869	0.96013	-0.0050777	0.043803
24345_16	74938	698	0.010202	-1.9869	0.96013	-0.0045857	0.043838
24356_73	74943	1986	0.010002	-1.9955	0.96326	0.0049789	0.044271
24379_47	74952	8138	0.011202	-1.9458	0.93712	-0.0036552	0.043839
24471_83	74983	1397	0.011602	-1.9304	0.92034	-0.0029932	0.043892
24562_58	75024	18779	0.010602	-1.97	0.95304	0.0053801	0.044272
24633_77	75043	2589	0.0088018	-2.0516	0.97316	-0.0033142	0.043867
24641_39	75051	2327	0.011802	-1.9229	0.91146	0.0038522	0.044223
24656_58	75054	10151	0.012803	-1.8871	0.83958	-0.0054393	0.043832
24729_182	75073	10235	0.010402	-1.9783	0.95666	-0.0055088	0.043779
24743_115	75076	9620	0.010402	-1.9783	0.95666	-0.0025656	0.043886
24809_185	75090	2869	0.012603	-1.894	0.856	0.0037187	0.044182
24891_251	75127	1482	0.0088018	-2.0516	0.97316	0.0014426	0.044078
24901_87	75133	10613	0.0088018	-2.0516	0.97316	0.0024804	0.044065
24953_54	75150	6040	0.019804	-1.6946	0.58528	0.023044	0.045705
24955_124	75150	6225	0.009802	-2.0044	0.96577	-0.0037307	0.043837
25010_28	75173	33067	0.011202	-1.9458	0.93712	-0.0034653	0.043854
25022_7	75175	21456	0.012002	-1.9155	0.89977	-0.0047793	0.043829
25067_97	75193	11853	0.009802	-2.0044	0.96577	0.0040206	0.044194
25098_28	75198	12128	0.0094019	-2.0227	0.96924	-0.0045508	0.043817
25105_61	75198	18780	0.012603	-1.894	0.856	-0.0028791	0.043924
25146_15	75210	35410	0.026005	-1.5735	0.45301	0.026906	0.045851
25151_24	75210	37544	0.022004	-1.6478	0.55465	0.025319	0.045784
25175_22	75213	132	0.0094019	-2.0227	0.96924	-0.0050249	0.043851
25320_38	75278	11804	0.010202	-1.9869	0.96013	-0.005331	0.043799
25340_51	75292	1777	0.009802	-2.0044	0.96577	-0.0021816	0.043945
25383_100	75295	20575	0.010202	-1.9869	0.96013	0.0013867	0.044078
25390_13	75295	62295	0.0062012	-2.2048	0.97774	0.00072858	0.043993
25402_167	75297	15105	0.010002	-1.9955	0.96326	-0.0029451	0.04384
25443_221	75308	21560	0.010202	-1.9869	0.96013	-0.0032049	0.043852
25453_126	75313	2707	0.012803	-1.8871	0.83958	-0.0052445	0.043804
25471_38	75314	17789	0.0076015	-2.1158	0.97674	-0.0003342	0.043952
25674_5	75376	4309	0.013003	-1.8803	0.82577	0.0059679	0.044382
25680_1	75376	54962	0.014603	-1.8292	0.72669	0.012615	0.044858
25696_100	75379	15353	0.0092018	-2.0321	0.97074	-0.0029622	0.043894
25786_176	75400	54505	0.0096019	-2.0135	0.96762	0.0028986	0.044175
25822_25	75410	969	0.012603	-1.894	0.856	-0.0046676	0.043834
25826_19	75410	1391	0.010002	-1.9955	0.96326	-0.0035011	0.043835
25835_6	75413	12586	0.0080016	-2.0933	0.97597	-0.0011854	0.043937
25891_4	75439	3188	0.011802	-1.9229	0.91146	-0.006237	0.043823
25894_1	75441	2578	0.0088018	-2.0516	0.97316	-0.0027346	0.043859
25944_3	75448	10371	0.0072014	-2.1394	0.97721	0.0027751	0.044146
26024_72	75474	34958	0.0092018	-2.0321	0.97074	-0.0034133	0.043878
26101_10	75492	3447	0.012002	-1.9155	0.89977	-0.0054045	0.043798
26171_253	75502	48963	0.012002	-1.9155	0.89977	0.0034486	0.044248
26273_309	75574	8810	0.0092018	-2.0321	0.97074	-0.0064347	0.043753
26274_42	75574	9168	0.0092018	-2.0321	0.97074	-0.0042544	0.043812
26307_190	75578	13477	0.011002	-1.9537	0.94359	-0.0036069	0.043888
26317_23	75581	5154	0.0094019	-2.0227	0.96924	0.0030493	0.044153
26318_16	75584	35	0.0096019	-2.0135	0.96762	0.00015995	0.043994
26323_33	75584	8106	0.0084017	-2.072	0.97491	-0.0042296	0.043798
26360_44	75591	71122	0.011802	-1.9229	0.91146	0.004749	0.044254
26374_113	75593	7323	0.0096019	-2.0135	0.96762	0.0019539	0.044098
26406_3	75598	12383	0.012402	-1.9011	0.87279	0.0021389	0.044109
26643_11	75715	2453	0.0092018	-2.0321	0.97074	0.00024551	0.043992
26644_10	75715	2481	0.010202	-1.9869	0.96013	0.0043861	0.044236
26710_26	75737	11433	0.0096019	-2.0135	0.96762	-0.0029735	0.043833
26728_48	75737	77522	0.012002	-1.9155	0.89977	-0.0055477	0.04382
26740_158	75740	6531	0.0078016	-2.1044	0.97638	0.002664	0.044112
26856_271	75777	23961	0.012202	-1.9082	0.88849	0.0047829	0.044254
26889_93	75789	3090	0.011002	-1.9537	0.94359	-0.0051686	0.043785
26935_90	75809	3674	0.011202	-1.9458	0.93712	0.0061927	0.044388
27045_15	75827	6026	0.010002	-1.9955	0.96326	-0.0041376	0.04383
27094_90	75843	2339	0.015403	-1.8057	0.68067	0.012924	0.044871
27128_47	75849	20537	0.010202	-1.9869	0.96013	0.0031343	0.044172
27137_37	75853	1411	0.0086017	-2.0617	0.97407	-0.0038026	0.043851
27243_86	75890	90470	0.010202	-1.9869	0.96013	-0.004855	0.04378
27267_154	75911	13975	0.0088018	-2.0516	0.97316	-0.00208	0.043899
27325_214	75912	78410	0.0088018	-2.0516	0.97316	-0.0023407	0.043935
27368_11	75941	19187	0.0094019	-2.0227	0.96924	-0.0034496	0.043912
27372_21	75941	21054	0.010202	-1.9869	0.96013	-0.0031463	0.043889
27456_2	75965	1442	0.0082016	-2.0825	0.97547	0.0050026	0.044234
27610_4	76012	3544	0.0092018	-2.0321	0.97074	-0.00034016	0.043982
27614_13	76012	20931	0.010802	-1.9618	0.94796	-0.0042394	0.043823
27642_31	76019	32441	0.0078016	-2.1044	0.97638	-0.0027943	0.043858
27743_102	76079	2824	0.0058012	-2.234	0.97778	-0.0013039	0.043898
27791_315	76080	23402	0.010002	-1.9955	0.96326	-0.0017702	0.043906
27872_107	76096	18378	0.010602	-1.97	0.95304	-0.0018278	0.043944
27875_134	76096	27743	0.010002	-1.9955	0.96326	-0.0053312	0.043764
27880_28	76100	12626	0.011402	-1.938	0.9297	-0.0033689	0.043859
27937_51	76135	17159	0.0082016	-2.0825	0.97547	5.96e-05	0.043965
27947_74	76139	4005	0.0088018	-2.0516	0.97316	0.0015566	0.044039
28143_159	76204	5160	0.010202	-1.9869	0.96013	-0.0032899	0.043868
28146_93	76204	6277	0.0096019	-2.0135	0.96762	-0.0026284	0.043863
28147_131	76204	6431	0.011002	-1.9537	0.94359	-0.0047149	0.04378
28158_87	76204	36796	0.009802	-2.0044	0.96577	0.0011512	0.044025
28179_256	76222	965	0.0088018	-2.0516	0.97316	-0.0026771	0.043878
28189_1	76229	12322	0.012803	-1.8871	0.83958	0.0053988	0.044302
28212_38	76233	42931	0.011802	-1.9229	0.91146	-0.0026537	0.043981
28240_30	76236	26133	0.0088018	-2.0516	0.97316	0.0022692	0.044098
28242_73	76236	26525	0.0096019	-2.0135	0.96762	0.0012323	0.044074
28265_36	76236	78615	0.011402	-1.938	0.9297	0.0029307	0.044137
28291_20	76237	47388	0.015003	-1.8173	0.7073	0.012134	0.044751
28314_4	76251	2253	0.010202	-1.9869	0.96013	-0.0035632	0.043854
28327_3	76261	3371	0.010202	-1.9869	0.96013	-0.0023678	0.043964
28334_41	76266	3462	0.0074015	-2.1275	0.97698	0.0039256	0.044177
28423_43	76298	5680	0.0068014	-2.1644	0.97751	0.0012854	0.044019
28482_27	76298	208586	0.010802	-1.9618	0.94796	0.0018262	0.044067
28488_5	76298	213918	0.009802	-2.0044	0.96577	0.0014455	0.044037
28496_39	76300	1173	0.023805	-1.6129	0.50411	0.033184	0.046498
28519_67	76308	1678	0.0094019	-2.0227	0.96924	-0.0050523	0.043811
28643_67	76335	99	0.011802	-1.9229	0.91146	-0.0032675	0.043933
28686_18	76367	728	0.011802	-1.9229	0.91146	-0.0043858	0.043858
28745_201	76410	55232	0.010602	-1.97	0.95304	-0.0022771	0.043886
28765_108	76412	1197	0.0092018	-2.0321	0.97074	-0.00046259	0.043963
28825_65	76459	3492	0.011002	-1.9537	0.94359	-0.0048878	0.043797
28829_43	76459	8170	0.0078016	-2.1044	0.97638	0.0048229	0.044286
28848_88	76465	3087	0.011202	-1.9458	0.93712	-0.0061067	0.043777
28883_86	76481	5004	0.0082016	-2.0825	0.97547	-0.0025488	0.043898
28907_182	76500	11349	0.010402	-1.9783	0.95666	-0.0028984	0.043926
28941_31	76520	2882	0.0094019	-2.0227	0.96924	-0.0052472	0.043768
28950_159	76525	1154	0.0084017	-2.072	0.97491	-0.0011289	0.0439
28975_79	76525	46124	0.011002	-1.9537	0.94359	-0.0035643	0.043898
28996_48	76525	76957	0.0090018	-2.0417	0.97213	-0.0018	0.043908
29008_67	76525	92281	0.012402	-1.9011	0.87279	-0.0071643	0.043824
29206_1	76637	2532	0.0092018	-2.0321	0.97074	-0.0051701	0.043791
29237_142	76651	1714	0.0090018	-2.0417	0.97213	-0.0019867	0.043881
29247_151	76668	10255	0.010802	-1.9618	0.94796	-0.0057385	0.043782
29253_66	76676	181	0.0084017	-2.072	0.97491	-0.003104	0.043866
29413_10	76714	887	0.010202	-1.9869	0.96013	-0.0052915	0.043836
29480_39	76722	72824	0.0088018	-2.0516	0.97316	-0.0024845	0.043889
29485_54	76722	80054	0.011602	-1.9304	0.92034	-0.0035937	0.043898
29496_130	76722	105401	0.0090018	-2.0417	0.97213	-0.0022343	0.043889
29575_23	76740	36033	0.011002	-1.9537	0.94359	-0.0031839	0.043948
29625_17	76750	43743	0.012603	-1.894	0.856	0.0079023	0.044477
29682_111	76766	3170	0.0088018	-2.0516	0.97316	-0.0040421	0.043802
29690_30	76773	1496	0.011002	-1.9537	0.94359	-0.0052539	0.04377
29701_32	76775	5957	0.0096019	-2.0135	0.96762	-0.0059205	0.043766
29714_59	76778	6173	0.011602	-1.9304	0.92034	-0.0048503	0.043829
29735_270	76785	203	0.010202	-1.9869	0.96013	-0.0023704	0.043943
29771_62	76795	52935	0.013003	-1.8803	0.82577	0.011228	0.044711
29781_68	76795	57856	0.012402	-1.9011	0.87279	-0.0060583	0.043771
29827_36	76795	213888	0.013403	-1.8669	0.7887	0.0035657	0.044229
29837_289	76795	227547	0.0078016	-2.1044	0.97638	0.0015618	0.044027
29853_18	76806	33700	0.0080016	-2.0933	0.97597	0.00063015	0.044005
29871_95	76813	1743	0.012603	-1.894	0.856	0.0093131	0.044549
29881_15	76823	3229	0.0078016	-2.1044	0.97638	0.00049938	0.044051
29924_217	76831	56500	0.0076015	-2.1158	0.97674	0.0050955	0.044238
30031_13	76883	12199	0.0064013	-2.1909	0.97769	-0.00066358	0.043911
30060_26	76883	123974	0.011202	-1.9458	0.93712	-0.0077805	0.043773
30152_74	76904	22704	0.012002	-1.9155	0.89977	-0.0014205	0.043951
30177_4	76917	1093	0.011402	-1.938	0.9297	-0.0018062	0.043996
30211_108	76928	36579	0.012402	-1.9011	0.87279	-0.00639	0.043784
30232_10	76928	93797	0.010202	-1.9869	0.96013	0.0024044	0.044158
30247_89	76928	122003	0.0086017	-2.0617	0.97407	0.0028226	0.044119
30280_103	76938	35445	0.010002	-1.9955	0.96326	-0.003689	0.043866
30285_75	76938	37395	0.0092018	-2.0321	0.97074	-0.00062703	0.043973
30432_56	76950	77507	0.0076015	-2.1158	0.97674	0.0014053	0.044053
30520_71	76968	13297	0.69394	0.35551	0.049551	1.1072	0.13252
30622_13	76983	14953	0.011802	-1.9229	0.91146	-0.0026546	0.04398
30695_14	76983	208635	0.0094019	-2.0227	0.96924	-0.00035078	0.043951
30779_205	77013	27545	0.010402	-1.9783	0.95666	-0.0032122	0.043878
30794_37	77013	102850	0.0094019	-2.0227	0.96924	0.004377	0.04423
30809_115	77013	161038	0.041408	-1.3645	0.32042	0.063051	0.049111
30832_93	77013	346919	0.011602	-1.9304	0.92034	-0.0053315	0.043808
30848_26	77013	372504	0.011602	-1.9304	0.92034	-0.00091414	0.043966
30850_63	77013	373998	0.010802	-1.9618	0.94796	-0.0066071	0.0438
30884_68	77013	498323	0.013203	-1.8736	0.80772	0.0060463	0.044371
30908_11	77023	719	0.0088018	-2.0516	0.97316	-0.0050887	0.043764
30924_63	77032	5254	0.014203	-1.8414	0.74358	0.011794	0.044707
30983_21	77053	56655	0.0076015	-2.1158	0.97674	-0.0014867	0.043904
30987_108	77053	59875	0.0084017	-2.072	0.97491	-0.0021917	0.043852
31005_38	77053	94595	0.010402	-1.9783	0.95666	-0.0029527	0.043857
31030_16	77053	143110	0.0084017	-2.072	0.97491	0.005288	0.044228
31038_56	77053	157443	0.0078016	-2.1044	0.97638	-0.00067643	0.043972
31055_214	77053	180341	0.030606	-1.5007	0.41254	0.041829	0.04729
31103_42	77063	8062	0.0080016	-2.0933	0.97597	0.00093381	0.044053
31153_29	77073	144182	0.009802	-2.0044	0.96577	-0.002356	0.043904
31166_20	77073	165432	0.0086017	-2.0617	0.97407	-0.00071956	0.043937
31175_10	77073	181426	0.0096019	-2.0135	0.96762	-0.0046336	0.043819
31187_80	77073	253820	0.0090018	-2.0417	0.97213	-0.00043533	0.043985
31216_113	77073	318717	0.011002	-1.9537	0.94359	0.0079611	0.044485
31223_22	77073	326961	0.0092018	-2.0321	0.97074	0.00094788	0.044031
31226_38	77073	330864	0.010002	-1.9955	0.96326	-0.0029744	0.043856
31248_67	77073	393224	0.010402	-1.9783	0.95666	0.0063407	0.044341
31307_7	77081	192464	0.0088018	-2.0516	0.97316	0.0026254	0.044097
31317_278	77082	1404	0.011202	-1.9458	0.93712	-0.0031965	0.043867
31325_1	77083	6006	0.0084017	-2.072	0.97491	-0.0026141	0.043857
31368_52	77100	11895	0.0084017	-2.072	0.97491	-0.0050462	0.043756
31377_114	77100	26997	0.0090018	-2.0417	0.97213	-0.0025451	0.043897
31380_14	77100	30138	0.009802	-2.0044	0.96577	0.0052133	0.044276
31389_142	77100	34533	0.010802	-1.9618	0.94796	-0.0025225	0.043946
31428_62	77100	82140	0.009802	-2.0044	0.96577	-0.0023538	0.044025
31474_26	77100	214974	0.010402	-1.9783	0.95666	0.0013175	0.044071
31518_34	77105	449	0.010202	-1.9869	0.96013	-0.001926	0.043876
31523_49	77108	1769	0.0096019	-2.0135	0.96762	-0.001365	0.043928
31545_101	77113	50541	0.010602	-1.97	0.95304	0.0083709	0.044559
31550_124	77113	60028	0.011202	-1.9458	0.93712	-0.004253	0.04383
31596_78	77113	140475	0.0082016	-2.0825	0.97547	-0.0049317	0.043769
31622_288	77113	226151	0.0084017	-2.072	0.97491	-0.0035649	0.043904
31662_9	77123	38768	0.0080016	-2.0933	0.97597	0.0031521	0.044129
31721_101	77123	148118	0.010002	-1.9955	0.96326	-0.0045115	0.043799
31778_85	77123	271974	0.012002	-1.9155	0.89977	-0.0047683	0.043816
31805_84	77134	1077	0.010402	-1.9783	0.95666	0.0061781	0.044397
31924_150	77143	2669	0.012603	-1.894	0.856	-0.0082255	0.043731
31930_49	77152	2722	0.0088018	-2.0516	0.97316	-0.002419	0.043909
31945_4	77158	353	0.011002	-1.9537	0.94359	-0.0042227	0.043817
31966_86	77166	8220	0.009802	-2.0044	0.96577	0.0035382	0.044195
32054_25	77174	5079	0.0078016	-2.1044	0.97638	-0.00035536	0.043971
32058_19	77175	4476	0.009802	-2.0044	0.96577	-0.0024873	0.043902
32071_24	77179	3463	0.0092018	-2.0321	0.97074	-0.003208	0.043855
32178_25	77182	251626	0.0086017	-2.0617	0.97407	0.0006285	0.043973
32228_171	77191	2464	0.009802	-2.0044	0.96577	-0.00085754	0.043943
32268_49	77191	84524	0.0092018	-2.0321	0.97074	0.0030073	0.044111
32276_10	77191	96320	0.0088018	-2.0516	0.97316	0.00086139	0.044056
32298_10	77191	172546	0.0072014	-2.1394	0.97721	-0.0018462	0.043924
32301_113	77191	175461	0.010802	-1.9618	0.94796	-0.0044416	0.043813
32312_63	77191	189537	0.010402	-1.9783	0.95666	-0.0013636	0.044019
32314_55	77191	193991	0.0066013	-2.1775	0.97761	-0.0021386	0.04388
32336_20	77191	224262	0.0088018	-2.0516	0.97316	-0.0030084	0.043814
32473_10	77242	129988	0.0090018	-2.0417	0.97213	-0.0031155	0.043859
32499_102	77242	171245	0.012002	-1.9155	0.89977	-0.0036769	0.043902
32517_18	77242	194178	0.010002	-1.9955	0.96326	-0.004374	0.043841
32684_127	77254	19384	0.0090018	-2.0417	0.97213	-0.00096192	0.043956
32733_31	77254	124707	0.0094019	-2.0227	0.96924	-0.0013351	0.043941
32736_70	77254	178475	0.010402	-1.9783	0.95666	-0.005092	0.043812
32753_55	77254	202576	0.0064013	-2.1909	0.97769	0.00043429	0.043947
32757_17	77254	205927	0.023005	-1.6281	0.52848	0.026814	0.045892
32761_54	77254	212511	0.014203	-1.8414	0.74358	0.0098722	0.044663
32848_33	77254	412800	0.011402	-1.938	0.9297	0.0067552	0.044358
32923_258	77268	47337	0.009802	-2.0044	0.96577	-0.002809	0.043879
33102_168	77279	75518	0.011802	-1.9229	0.91146	0.010163	0.044657
33182_32	77279	357275	0.011602	-1.9304	0.92034	0.0073756	0.044391
33208_125	77279	422854	0.014603	-1.8292	0.72669	0.011079	0.044684
33223_107	77281	961	0.011602	-1.9304	0.92034	0.0044125	0.044239
33291_31	77281	153446	0.0080016	-2.0933	0.97597	-0.0037549	0.043875
33320_8	77281	212912	0.011002	-1.9537	0.94359	0.0049131	0.044273
33480_11	77304	83329	0.0078016	-2.1044	0.97638	-0.0013013	0.043899
33508_56	77304	147266	0.011202	-1.9458	0.93712	0.0047093	0.044305
33584_32	77308	6403	0.010402	-1.9783	0.95666	-0.0014194	0.043929
33610_11	77308	52014	0.0086017	-2.0617	0.97407	-0.0043954	0.043853
33626_169	77308	90206	0.0092018	-2.0321	0.97074	0.0028944	0.044092
33632_6	77308	96042	0.010002	-1.9955	0.96326	-0.0026485	0.043896
33645_92	77308	166140	0.0082016	-2.0825	0.97547	-0.00079927	0.043941
33659_14	77308	185406	0.0074015	-2.1275	0.97698	-0.0023711	0.043863
33662_4	77308	186349	0.010202	-1.9869	0.96013	-0.0026559	0.043914
33755_70	77308	478469	0.013603	-1.8604	0.77662	0.012142	0.044757
33779_13	77315	4783	0.0078016	-2.1044	0.97638	-0.00082858	0.0439
33914_83	77319	305179	0.013203	-1.8736	0.80772	-0.0075005	0.043796
33929_6	77319	332221	0.0078016	-2.1044	0.97638	-0.00096835	0.043918
34002_87	77334	8332	0.0080016	-2.0933	0.97597	-0.002315	0.043857
34012_25	77340	8232	0.011802	-1.9229	0.91146	-0.0030231	0.043876
34083_7	77340	148063	0.011402	-1.938	0.9297	0.0023913	0.044106
34124_3	77340	239678	0.011002	-1.9537	0.94359	-0.0042307	0.043957
34158_181	77340	354261	0.010002	-1.9955	0.96326	-0.0011373	0.043956
34169_56	77340	366564	0.0090018	-2.0417	0.97213	-0.0039046	0.043816
34200_31	77351	5143	0.012202	-1.9082	0.88849	-0.0009649	0.044009
34226_58	77351	88981	0.010402	-1.9783	0.95666	0.0058905	0.04433
34227_8	77351	89054	0.0092018	-2.0321	0.97074	0.00065804	0.044061
34235_0	77351	100514	0.0086017	-2.0617	0.97407	-0.0018564	0.043901
34260_51	77351	204415	0.010602	-1.97	0.95304	0.0075834	0.044467
34271_11	77351	219029	0.0082016	-2.0825	0.97547	-0.0020259	0.043899
34278_145	77351	227087	0.013003	-1.8803	0.82577	-0.0068823	0.04378
34309_20	77351	281461	0.010802	-1.9618	0.94796	-0.00028794	0.043998
34332_45	77351	347239	0.010802	-1.9618	0.94796	-0.0061311	0.043789
34335_71	77351	348113	0.010402	-1.9783	0.95666	0.0052301	0.044336
34368_24	77351	399204	0.011402	-1.938	0.9297	-0.0044528	0.043828
34391_59	77351	442566	0.010202	-1.9869	0.96013	-0.0045757	0.043844
34440_39	77351	530718	0.0086017	-2.0617	0.97407	-0.0033959	0.043838
34481_56	77357	14853	0.013803	-1.854	0.7641	0.012469	0.044893
34485_43	77357	16448	0.0086017	-2.0617	0.97407	-0.0030087	0.043852
34498_19	77357	47305	0.014403	-1.8353	0.73682	0.0088962	0.044534
34502_21	77357	55324	0.0082016	-2.0825	0.97547	-7.07e-05	0.043984
34528_21	77357	161497	0.009802	-2.0044	0.96577	-9.27e-05	0.044066
34545_47	77357	173491	0.010402	-1.9783	0.95666	-0.00049888	0.044017
34578_99	77357	245566	0.91898	1.0547	0.016415	1.5062	0.166
34611_7	77357	320223	0.0076015	-2.1158	0.97674	-0.00030676	0.043935
34618_32	77357	331781	0.009802	-2.0044	0.96577	0.0064082	0.044379
34767_6	77364	353083	0.011002	-1.9537	0.94359	0.0068926	0.044376
34779_51	77364	370661	0.0084017	-2.072	0.97491	-0.001564	0.043914
34812_116	77364	468366	0.0090018	-2.0417	0.97213	0.0053724	0.044295
34861_24	77364	647187	0.0064013	-2.1909	0.97769	0.00060257	0.04396
34916_42	77372	52164	0.0092018	-2.0321	0.97074	0.00034088	0.044003
34958_39	77372	108603	0.012202	-1.9082	0.88849	-0.0032766	0.043869
34987_90	77372	182079	0.0094019	-2.0227	0.96924	-0.00022683	0.044028
35016_7	77372	242515	0.011002	-1.9537	0.94359	-0.0035998	0.043863
35033_11	77372	263351	0.014003	-1.8477	0.75369	0.016019	0.045077
35106_90	77372	424668	0.0096019	-2.0135	0.96762	0.00010261	0.044004
35107_14	77372	435784	0.009802	-2.0044	0.96577	-0.0052959	0.043802
35126_119	77372	458480	0.0096019	-2.0135	0.96762	-0.0031491	0.043863
35281_24	77376	273350	0.0082016	-2.0825	0.97547	-0.0013905	0.043917
35329_206	77376	385560	0.0080016	-2.0933	0.97597	-0.0029485	0.043842
35339_23	77376	426457	0.010802	-1.9618	0.94796	-0.0033637	0.043896
35367_66	77376	515323	0.0080016	-2.0933	0.97597	-0.0025016	0.043874
35369_8	77376	520386	0.013403	-1.8669	0.7887	-0.0054689	0.04385
35444_0	77401	5054	0.010002	-1.9955	0.96326	-0.0043595	0.043832
35447_61	77407	481	0.0090018	-2.0417	0.97213	-0.0039114	0.043807
35451_45	77408	169	0.0072014	-2.1394	0.97721	-0.0019612	0.043856
35461_130	77408	42264	0.0084017	-2.072	0.97491	0.0018566	0.044067
35472_183	77408	71798	0.010202	-1.9869	0.96013	-0.0027165	0.043897
35497_17	77408	137983	0.011602	-1.9304	0.92034	-0.0028748	0.043887
35513_35	77408	169935	0.0088018	-2.0516	0.97316	0.0029277	0.044165
35534_13	77408	197989	0.0088018	-2.0516	0.97316	-0.0035662	0.043854
35550_119	77408	221489	0.0074015	-2.1275	0.97698	-0.0014284	0.043915
35565_31	77408	266571	0.013403	-1.8669	0.7887	-0.0038012	0.043886
35572_61	77408	268126	0.0092018	-2.0321	0.97074	-0.0036039	0.043836
35586_18	77408	290757	0.0088018	-2.0516	0.97316	-0.0050727	0.043796
35658_77	77408	461514	0.0076015	-2.1158	0.97674	0.00063016	0.043985
35660_21	77408	462282	0.011402	-1.938	0.9297	-0.0027911	0.043876
35672_60	77408	489906	0.0086017	-2.0617	0.97407	0.0017869	0.044036
35673_215	77408	490188	0.012202	-1.9082	0.88849	-0.004178	0.043821
35695_151	77408	543535	0.0096019	-2.0135	0.96762	-0.0043159	0.043777
35722_52	77408	586601	0.013003	-1.8803	0.82577	-0.0067154	0.04376
35751_23	77411	43671	0.0090018	-2.0417	0.97213	-0.00028992	0.044003
35774_62	77411	84241	0.0094019	-2.0227	0.96924	0.00094805	0.043989
35857_3	77419	9477	0.0076015	-2.1158	0.97674	0.0007901	0.043967
35880_113	77426	15368	0.011202	-1.9458	0.93712	-0.0029951	0.043832
35899_26	77426	72218	0.010402	-1.9783	0.95666	0.0022807	0.044084
35900_57	77426	72308	0.0064013	-2.1909	0.97769	-0.002998	0.043806
35971_4	77426	258017	0.012803	-1.8871	0.83958	0.008023	0.044471
35980_49	77426	277153	0.010602	-1.97	0.95304	-0.0063978	0.043739
36004_92	77426	309904	0.010202	-1.9869	0.96013	0.0034034	0.04418
36071_21	77426	461322	0.012803	-1.8871	0.83958	0.012005	0.044805
36096_45	77426	509002	0.010002	-1.9955	0.96326	-0.0034337	0.043847
36137_105	77426	609921	0.0088018	-2.0516	0.97316	0.0023519	0.044061
36203_126	77434	28414	0.012002	-1.9155	0.89977	0.0061028	0.044339
36205_56	77434	35331	0.0092018	-2.0321	0.97074	-0.0045952	0.043784
36233_4	77434	88074	0.010402	-1.9783	0.95666	-0.0039773	0.043841
36301_67	77434	251512	0.010202	-1.9869	0.96013	-0.0017998	0.043922
36302_188	77434	251774	0.012803	-1.8871	0.83958	-0.0039816	0.043839
36306_8	77434	253244	0.0078016	-2.1044	0.97638	-0.0013597	0.043891
36328_148	77434	269373	0.0082016	-2.0825	0.97547	0.001554	0.04406
36329_40	77434	269568	0.010002	-1.9955	0.96326	-0.0039198	0.04388
36352_9	77434	299244	0.0084017	-2.072	0.97491	0.0013565	0.044056
36354_32	77434	299542	0.012402	-1.9011	0.87279	-0.0014589	0.043938
36371_11	77434	342421	0.010602	-1.97	0.95304	-0.0043251	0.043851
36390_15	77434	488806	0.010002	-1.9955	0.96326	-0.004804	0.043823
36410_57	77434	528437	0.0078016	-2.1044	0.97638	-0.0027472	0.043877
36424_13	77434	547853	0.010002	-1.9955	0.96326	-0.0049709	0.043799
36440_45	77434	581500	0.0088018	-2.0516	0.97316	-0.0046473	0.043819
36449_11	77434	630196	0.0086017	-2.0617	0.97407	0.0011677	0.044062
36463_15	77434	658504	0.010002	-1.9955	0.96326	-0.0024748	0.043902
36473_40	77434	680688	0.011002	-1.9537	0.94359	-0.0070157	0.043786
36476_0	77434	689948	0.0092018	-2.0321	0.97074	-0.0043026	0.043845
36507_7	77442	25152	0.015003	-1.8173	0.7073	-0.0049492	0.043908
36513_20	77442	36038	0.0092018	-2.0321	0.97074	-0.0018444	0.043897
36559_242	77442	152696	0.011402	-1.938	0.9297	0.0056082	0.044413
36578_29	77442	195375	0.0084017	-2.072	0.97491	-0.0040531	0.043807
36579_38	77442	195449	0.011402	-1.938	0.9297	-0.0045998	0.043866
36596_164	77442	207847	0.011202	-1.9458	0.93712	-0.0035311	0.043854
36601_17	77442	209787	0.012002	-1.9155	0.89977	0.004547	0.044328
36716_100	77442	465558	0.0092018	-2.0321	0.97074	-0.0020513	0.043915
36746_32	77442	522132	0.014803	-1.8232	0.71572	0.011308	0.044724
36770_3	77442	548484	0.0080016	-2.0933	0.97597	0.00089262	0.04402
36786_80	77444	34933	0.0090018	-2.0417	0.97213	-0.0041027	0.043852
36844_91	77444	147703	0.013203	-1.8736	0.80772	0.0019157	0.044163
36856_24	77444	194592	0.009802	-2.0044	0.96577	-0.0014679	0.043944
36910_46	77444	338216	0.010402	-1.9783	0.95666	-0.0015275	0.043893
36978_149	77444	519433	0.0060012	-2.2191	0.97775	-0.00021613	0.04393
36999_37	77444	564532	0.010802	-1.9618	0.94796	-0.0040533	0.04386
37011_77	77444	593473	0.010602	-1.97	0.95304	-0.0027783	0.043873
37018_118	77444	608558	0.010202	-1.9869	0.96013	-0.002966	0.043914
37027_77	77444	620377	0.012002	-1.9155	0.89977	-0.0045686	0.043821
37119_87	77464	20391	0.0086017	-2.0617	0.97407	0.00024822	0.043969
37142_50	77466	14509	0.0078016	-2.1044	0.97638	0.0031329	0.044102
37187_21	77487	10933	0.010002	-1.9955	0.96326	-0.0021703	0.043911
37213_29	77487	52462	0.012603	-1.894	0.856	-0.0047407	0.04384
37222_63	77487	65048	0.0092018	-2.0321	0.97074	-0.0037564	0.043876
37239_2	77487	90804	0.011002	-1.9537	0.94359	-0.0028925	0.043915
37265_130	77487	120855	0.015803	-1.7943	0.66071	0.01395	0.044986
37281_247	77487	133581	0.0080016	-2.0933	0.97597	0.0046946	0.044271
37352_33	77487	310320	0.0090018	-2.0417	0.97213	0.00010464	0.043975
37359_7	77487	323934	0.011602	-1.9304	0.92034	0.0030674	0.044202
37362_12	77487	326568	0.011202	-1.9458	0.93712	-0.0028929	0.043871
37390_127	77487	408420	0.0082016	-2.0825	0.97547	-0.0017827	0.04388
37419_113	77487	478452	0.011002	-1.9537	0.94359	0.0071828	0.044459
37493_17	77487	622048	0.0082016	-2.0825	0.97547	0.0050966	0.044224
37495_31	77487	622436	0.009802	-2.0044	0.96577	0.00025384	0.044017
37569_46	77488	35306	0.0056011	-2.2493	0.97781	-0.0014763	0.043927
37614_198	77488	183710	0.010802	-1.9618	0.94796	-0.00054576	0.043978
37620_100	77488	195312	0.010402	-1.9783	0.95666	-0.0021177	0.043931
37630_99	77488	210542	0.0086017	-2.0617	0.97407	0.0003353	0.04395
37642_38	77488	235706	0.0082016	-2.0825	0.97547	-0.0025022	0.043859
37687_55	77488	351228	0.0094019	-2.0227	0.96924	0.0010804	0.044018
37754_43	77488	538322	0.0080016	-2.0933	0.97597	-0.0035231	0.043827
37759_6	77488	544272	0.010802	-1.9618	0.94796	-0.0037162	0.043906
37762_9	77488	558567	0.0090018	-2.0417	0.97213	-0.0030506	0.043899
37775_19	77488	578867	0.011402	-1.938	0.9297	-0.0034378	0.043883
37795_43	77488	610081	0.013603	-1.8604	0.77662	-0.0054396	0.043823
37818_119	77488	662887	0.011402	-1.938	0.9297	0.0051961	0.044375
37828_15	77488	679528	0.012002	-1.9155	0.89977	-0.0050944	0.043856
37833_56	77488	688881	0.010202	-1.9869	0.96013	-0.0051391	0.043816
37840_17	77488	702021	0.0080016	-2.0933	0.97597	0.0034222	0.044157
37848_7	77488	726815	0.0066013	-2.1775	0.97761	-0.0025815	0.043873
37850_79	77488	735828	0.0084017	-2.072	0.97491	-0.0020033	0.043869
37887_29	77488	816150	0.0096019	-2.0135	0.96762	0.0089632	0.04457
37908_10	77488	865172	0.012402	-1.9011	0.87279	0.0094996	0.044657
37924_39	77488	898399	0.0090018	-2.0417	0.97213	-0.0021714	0.043923
37947_127	77488	927359	0.0090018	-2.0417	0.97213	0.0042044	0.044308
37981_105	77488	965307	0.014403	-1.8353	0.73682	0.0077415	0.044485
37982_4	77488	965423	0.012803	-1.8871	0.83958	0.0066557	0.044435
38231_18	77517	399037	0.0090018	-2.0417	0.97213	-0.0019545	0.043952
38252_60	77517	449412	0.11602	-0.8819	0.18399	0.18121	0.058303
38273_85	77517	472814	0.0078016	-2.1044	0.97638	-0.0018337	0.043918
38315_210	77517	630679	0.999	2.9995	0.00025338	1.8037	0.1968
38332_57	77517	671108	0.9938	2.2048	0.00085573	1.7875	0.19501
38337_36	77517	681147	0.0080016	-2.0933	0.97597	-0.0052996	0.043801
38349_24	77517	690738	0.9834	1.7725	0.0030824	1.6418	0.17812
38362_23	77517	712682	0.0082016	-2.0825	0.97547	0.0043031	0.044158
38411_1	77517	820345	0.0090018	-2.0417	0.97213	-0.0022349	0.043976
38426_99	77517	849937	0.012202	-1.9082	0.88849	0.0076306	0.04447
38446_72	77520	4015	0.010802	-1.9618	0.94796	0.0028392	0.044134
38469_44	77520	51022	0.0062012	-2.2048	0.97774	-0.0011199	0.043891
38493_67	77520	125505	0.010802	-1.9618	0.94796	-0.0039138	0.043852
38521_2	77520	190886	0.011202	-1.9458	0.93712	-0.0032438	0.04388
38572_78	77520	325280	0.011202	-1.9458	0.93712	-0.0060869	0.04377
38602_86	77520	424352	0.010402	-1.9783	0.95666	-0.0058548	0.043776
38625_121	77520	464824	0.012402	-1.9011	0.87279	-0.0048823	0.043858
38646_34	77520	527007	0.010602	-1.97	0.95304	0.0048049	0.044253
38724_17	77520	741487	0.011002	-1.9537	0.94359	-0.0043644	0.043789
38799_42	77526	38105	0.011402	-1.938	0.9297	0.0083896	0.044485
38814_10	77526	79018	0.012202	-1.9082	0.88849	0.011493	0.044766
38914_46	77526	361596	0.011402	-1.938	0.9297	0.0024029	0.044104
38940_45	77526	404531	0.0088018	-2.0516	0.97316	-0.0031578	0.043843
38979_44	77526	525788	0.010202	-1.9869	0.96013	0.0048639	0.044298
39006_32	77526	609092	0.0078016	-2.1044	0.97638	-0.0035581	0.043876
39027_10	77526	638077	0.010402	-1.9783	0.95666	-0.0041358	0.043883
39072_26	77526	763772	0.0078016	-2.1044	0.97638	-0.00017569	0.043956
39186_44	77526	1069283	0.0078016	-2.1044	0.97638	-0.0036512	0.04383
39219_102	77526	1149918	0.0062012	-2.2048	0.97774	-0.0011365	0.043888
39249_89	77526	1198357	0.0074015	-2.1275	0.97698	-0.0025482	0.043825
39281_38	77526	1264577	0.0090018	-2.0417	0.97213	-0.0038965	0.043791
39349_62	77537	118563	0.0096019	-2.0135	0.96762	-0.0024264	0.043934
39351_38	77537	123208	0.0076015	-2.1158	0.97674	-0.0034151	0.043854
39456_69	77537	382358	0.010802	-1.9618	0.94796	-0.0028634	0.043881
39540_68	77537	633214	0.012202	-1.9082	0.88849	0.0038648	0.04423
39544_9	77537	646844	0.011402	-1.938	0.9297	-0.0043232	0.043849
39545_57	77537	646917	0.011602	-1.9304	0.92034	-0.0050784	0.043828
39551_229	77537	663373	0.0060012	-2.2191	0.97775	0.00028278	0.043966
39560_33	77537	676829	0.010002	-1.9955	0.96326	-0.0025279	0.04391
39567_20	77537	704287	0.0088018	-2.0516	0.97316	0.00051239	0.043987
39568_183	77537	704497	0.0094019	-2.0227	0.96924	1.04e-05	0.044045
39590_252	77537	736641	0.0090018	-2.0417	0.97213	0.00027813	0.043986
39603_101	77537	754284	0.0088018	-2.0516	0.97316	0.0010711	0.04399
39606_92	77537	754694	0.0074015	-2.1275	0.97698	-0.0027609	0.043848
39608_7	77537	755064	0.0090018	-2.0417	0.97213	-0.0049163	0.04376
39628_268	77537	778777	0.0068014	-2.1644	0.97751	-0.001858	0.043861
39638_135	77537	795848	0.011802	-1.9229	0.91146	-0.0033347	0.043865
39645_273	77537	803781	0.011002	-1.9537	0.94359	0.0076243	0.044369
39664_44	77537	827761	0.0094019	-2.0227	0.96924	-0.0027418	0.043888
39671_81	77537	850894	0.010202	-1.9869	0.96013	-0.0051052	0.043856
39691_64	77537	882605	0.0080016	-2.0933	0.97597	0.0029511	0.044122
39713_65	77537	915252	0.010402	-1.9783	0.95666	-0.004371	0.043882
39717_167	77537	916245	0.009802	-2.0044	0.96577	-0.0024853	0.043899
39794_144	77537	1057012	0.0088018	-2.0516	0.97316	-0.0010773	0.043925
39820_142	77537	1111342	0.012202	-1.9082	0.88849	-0.004422	0.043841
39830_11	77537	1126865	0.011802	-1.9229	0.91146	0.0045499	0.044288
39862_8	77537	1168469	0.012002	-1.9155	0.89977	-0.003834	0.043856
39865_17	77537	1168900	0.010602	-1.97	0.95304	0.0032285	0.044142
39867_50	77537	1175040	0.011602	-1.9304	0.92034	-0.0060889	0.043775
39874_187	77537	1181984	0.010602	-1.97	0.95304	-0.0062592	0.043786
39898_60	77537	1220028	0.009802	-2.0044	0.96577	0.0078283	0.044528
39920_7	77537	1251397	0.0082016	-2.0825	0.97547	-0.0010607	0.043934
39925_97	77537	1260581	0.0086017	-2.0617	0.97407	0.0048178	0.044243
39947_74	77537	1287043	0.0082016	-2.0825	0.97547	-0.003202	0.043861
39982_40	77537	1351123	0.0086017	-2.0617	0.97407	-0.004811	0.043848
39988_155	77537	1359005	0.011202	-1.9458	0.93712	0.00081154	0.044063
40156_86	77540	391448	0.0082016	-2.0825	0.97547	-0.0016156	0.043933
40213_126	77540	520725	0.010202	-1.9869	0.96013	-0.0056467	0.043808
40219_109	77540	528159	0.010602	-1.97	0.95304	0.0044378	0.04422
40249_3	77540	607733	0.0078016	-2.1044	0.97638	-0.0042419	0.043816
40287_64	77540	665156	0.0084017	-2.072	0.97491	3.22e-05	0.043985
40294_146	77540	677932	0.010002	-1.9955	0.96326	-0.0031617	0.04389
40308_85	77540	702033	0.011802	-1.9229	0.91146	-0.0058542	0.043807
40364_190	77540	838522	0.0086017	-2.0617	0.97407	-6.37e-05	0.043996
40384_2	77540	885466	0.0096019	-2.0135	0.96762	0.0013753	0.044016
40654_46	77540	1362237	0.012803	-1.8871	0.83958	0.010662	0.044734
40656_83	77540	1365542	0.009802	-2.0044	0.96577	-0.0029425	0.043863
40713_132	77549	82167	0.0092018	-2.0321	0.97074	-0.0036962	0.043841
40729_12	77549	121911	0.010602	-1.97	0.95304	-0.0030541	0.043852
40730_40	77549	121970	0.0084017	-2.072	0.97491	0.0007559	0.044015
40746_19	77549	156630	0.012402	-1.9011	0.87279	-0.0055458	0.043816
40773_73	77549	249629	0.011202	-1.9458	0.93712	-0.0031204	0.043869
40790_5	77549	282817	0.010002	-1.9955	0.96326	-0.0053151	0.043802
40803_6	77549	304211	0.0090018	-2.0417	0.97213	-0.0039732	0.043821
40861_39	77549	430637	0.0086017	-2.0617	0.97407	-0.0025885	0.043903
40910_76	77549	470210	0.0094019	-2.0227	0.96924	-0.00019723	0.04401
40976_151	77549	581052	0.0080016	-2.0933	0.97597	0.0034771	0.04412
40978_49	77549	583490	0.0074015	-2.1275	0.97698	-0.0024839	0.043894
40986_13	77549	610331	0.011802	-1.9229	0.91146	0.0051692	0.044312
41024_75	77549	682016	0.027005	-1.5567	0.44015	0.033834	0.046581
41106_15	77550	8770	0.0094019	-2.0227	0.96924	0.0018499	0.044136
41120_8	77550	42802	0.012202	-1.9082	0.88849	-0.0021894	0.044032
41141_81	77550	100711	0.009802	-2.0044	0.96577	0.0052661	0.044317
41163_26	77550	158557	0.010002	-1.9955	0.96326	0.0036786	0.044189
41176_42	77550	195173	0.0084017	-2.072	0.97491	-0.0019312	0.043901
41263_52	77550	421098	0.0088018	-2.0516	0.97316	-0.00031689	0.043933
41291_13	77550	477763	0.0070014	-2.1518	0.97739	-0.0013985	0.043914
41301_88	77550	496673	0.0068014	-2.1644	0.97751	0.0028885	0.044137
41309_66	77550	512922	0.021004	-1.6685	0.55873	0.026162	0.045939
41461_39	77550	835161	0.0088018	-2.0516	0.97316	-0.0017343	0.043888
41563_60	77550	1027219	0.0092018	-2.0321	0.97074	-0.0020801	0.04391
41641_282	77550	1163060	0.010602	-1.97	0.95304	-0.0030855	0.04388
41750_64	77552	220332	0.0086017	-2.0617	0.97407	-0.00041614	0.044005
41804_44	77552	340787	0.0082016	-2.0825	0.97547	-0.0029574	0.043838
41820_27	77552	367980	0.012402	-1.9011	0.87279	-0.0070552	0.043753
41924_21	77552	621650	0.0080016	-2.0933	0.97597	-0.0010591	0.043901
41954_39	77552	679977	0.0076015	-2.1158	0.97674	0.0029577	0.044087
42045_195	77552	824993	0.010002	-1.9955	0.96326	0.0039002	0.04419
42063_28	77552	853660	0.013203	-1.8736	0.80772	-0.0061884	0.043767
42075_81	77552	867535	0.0084017	-2.072	0.97491	-0.0017759	0.043887
42084_1	77552	913928	0.0082016	-2.0825	0.97547	0.00063049	0.044029
42085_161	77552	914141	0.009802	-2.0044	0.96577	-0.0022398	0.043944
42113_95	77552	977294	0.010402	-1.9783	0.95666	-0.0059482	0.043752
42130_0	77555	12238	0.0094019	-2.0227	0.96924	-0.0034452	0.043836
42148_78	77573	786	0.0076015	-2.1158	0.97674	-0.0015126	0.043903
42241_182	77579	331073	0.012402	-1.9011	0.87279	0.008214	0.04455
42321_28	77579	688833	0.0094019	-2.0227	0.96924	-0.004551	0.043801
42336_6	77579	714024	0.0086017	-2.0617	0.97407	-0.0063075	0.043742
42362_154	77579	742978	0.0088018	-2.0516	0.97316	-0.0030631	0.043841
42376_0	77579	768499	0.0090018	-2.0417	0.97213	-0.0032708	0.043835
42390_81	77579	827460	0.0090018	-2.0417	0.97213	-0.00093286	0.043979
42401_8	77579	853017	0.032406	-1.4751	0.39	0.038308	0.046754
42419_205	77579	879225	0.012202	-1.9082	0.88849	0.0056486	0.044328
42432_338	77579	901348	0.0078016	-2.1044	0.97638	-0.0037001	0.043804
42463_170	77579	993663	0.012002	-1.9155	0.89977	-0.0053928	0.043795
42491_117	77579	1078368	0.0076015	-2.1158	0.97674	0.00029841	0.044021
42498_9	77579	1082781	0.010002	-1.9955	0.96326	-0.0034771	0.043838
42540_48	77579	1260304	0.011402	-1.938	0.9297	-0.0027399	0.043902
42560_61	77579	1340882	0.0090018	-2.0417	0.97213	-0.0053275	0.043751
42611_6	77579	1478562	0.0084017	-2.072	0.97491	-0.0022047	0.043891
42630_6	77579	1523404	0.010602	-1.97	0.95304	0.0045416	0.044266
42633_124	77579	1533518	0.0090018	-2.0417	0.97213	-0.0028377	0.043852
42683_24	77579	1635305	0.0076015	-2.1158	0.97674	0.00074245	0.044005
42704_19	77579	1684179	0.009802	-2.0044	0.96577	0.0017876	0.044061
42801_216	77585	11423	0.011802	-1.9229	0.91146	0.0019194	0.044082
42820_20	77592	12149	0.0092018	-2.0321	0.97074	-0.0035348	0.043864
42849_93	77592	68361	0.009802	-2.0044	0.96577	-0.0052552	0.043786
42941_26	77592	247625	0.010002	-1.9955	0.96326	0.00040303	0.043979
42949_48	77592	267073	0.010802	-1.9618	0.94796	-0.0041636	0.043878
42971_4	77592	346530	0.0082016	-2.0825	0.97547	-0.0024116	0.043833
42972_30	77592	346571	0.0088018	-2.0516	0.97316	-0.00033758	0.043988
43003_45	77592	405439	0.012002	-1.9155	0.89977	-0.0023536	0.043938
43032_52	77592	479849	0.010202	-1.9869	0.96013	-0.0038703	0.043836
43045_0	77592	526495	0.0090018	-2.0417	0.97213	-0.0029529	0.043893
43089_59	77592	646481	0.0096019	-2.0135	0.96762	-0.0018166	0.043933
43097_25	77592	659302	0.0096019	-2.0135	0.96762	-0.0061208	0.043764
43146_56	77592	838913	0.011402	-1.938	0.9297	-0.0030651	0.043921
43169_6	77592	890825	0.018204	-1.7319	0.60877	0.017334	0.045169
43192_57	77592	936827	0.010202	-1.9869	0.96013	0.0071948	0.044422
43201_120	77592	954367	0.0084017	-2.072	0.97491	-0.00306	0.043871
43209_26	77592	961817	0.0096019	-2.0135	0.96762	-0.0024579	0.043899
43248_84	77592	1118138	0.011402	-1.938	0.9297	-0.0038843	0.043885
43304_77	77592	1274248	0.011202	-1.9458	0.93712	-0.0012172	0.04393
43331_2	77592	1351625	0.0074015	-2.1275	0.97698	-0.0023072	0.043879
43343_34	77592	1398522	0.0086017	-2.0617	0.97407	0.00030633	0.04398
43346_1	77592	1407628	0.026805	-1.56	0.44666	0.033149	0.046486
43363_8	77592	1447609	0.0088018	-2.0516	0.97316	-0.0041048	0.043795
43388_18	77592	1499414	0.010802	-1.9618	0.94796	-0.0020192	0.043919
43401_22	77592	1527995	0.014403	-1.8353	0.73682	0.0094953	0.044493
43406_56	77592	1531147	0.0090018	-2.0417	0.97213	0.00021396	0.043979
43431_21	77595	17824	0.0096019	-2.0135	0.96762	-0.0018817	0.043911
43495_29	77595	178361	0.0066013	-2.1775	0.97761	0.00029822	0.043977
43517_53	77595	199700	0.0076015	-2.1158	0.97674	-0.00058071	0.043899
43539_14	77595	227992	0.0084017	-2.072	0.97491	-0.0015221	0.043938
43556_24	77595	249127	0.011002	-1.9537	0.94359	0.0068885	0.044401
43587_65	77595	334427	0.0088018	-2.0516	0.97316	0.0019347	0.044044
43657_173	77595	446388	0.012803	-1.8871	0.83958	0.0095304	0.044554
43669_29	77595	453062	0.0078016	-2.1044	0.97638	-0.0026865	0.043908
43707_151	77595	524406	0.0094019	-2.0227	0.96924	-0.0006641	0.043976
43811_20	77595	730080	0.0090018	-2.0417	0.97213	-0.0016929	0.043919
43875_73	77595	844246	0.011002	-1.9537	0.94359	-0.0027791	0.043885
44071_85	77595	1200181	0.0090018	-2.0417	0.97213	0.00082991	0.044006
44119_106	77597	7074	0.011602	-1.9304	0.92034	0.0088494	0.044635
44205_64	77597	149833	0.012402	-1.9011	0.87279	0.0086667	0.044544
44212_85	77597	157282	0.012603	-1.894	0.856	-0.0060499	0.043805
44249_5	77597	225860	0.0086017	-2.0617	0.97407	-0.00094425	0.04395
44253_148	77597	230991	0.012803	-1.8871	0.83958	-0.0049359	0.043853
44297_52	77597	334408	0.011002	-1.9537	0.94359	-0.0067401	0.043788
44299_12	77597	334855	0.0090018	-2.0417	0.97213	-0.0037902	0.043844
44317_90	77597	395912	0.011402	-1.938	0.9297	-0.0039372	0.043825
44373_41	77597	504101	0.0084017	-2.072	0.97491	0.0017447	0.044004
44400_120	77597	552950	0.010202	-1.9869	0.96013	-0.0025322	0.043887
44410_44	77597	567059	0.0064013	-2.1909	0.97769	-0.0021008	0.043852
44424_22	77597	605251	0.0080016	-2.0933	0.97597	0.0020741	0.044051
44433_81	77597	635392	0.010602	-1.97	0.95304	-0.0028423	0.043838
44434_2	77597	636710	0.011802	-1.9229	0.91146	-0.0050732	0.043832
44441_35	77597	648003	0.0092018	-2.0321	0.97074	-0.0023493	0.043886
44478_145	77597	784889	0.0094019	-2.0227	0.96924	-0.0024341	0.043922
44493_5	77597	820376	0.010602	-1.97	0.95304	-0.0047117	0.043833
44511_42	77597	895900	0.016603	-1.7725	0.64066	0.013055	0.044874
44527_20	77597	952026	0.011602	-1.9304	0.92034	0.0065267	0.044392
44547_92	77597	994763	0.0078016	-2.1044	0.97638	-0.00054869	0.043948
44550_21	77597	999425	0.011402	-1.938	0.9297	0.0039037	0.044169
44551_29	77597	999482	0.0090018	-2.0417	0.97213	-0.0043298	0.043813
44553_13	77597	999901	0.0086017	-2.0617	0.97407	0.001595	0.044026
44565_20	77597	1028433	0.009802	-2.0044	0.96577	-0.0043665	0.043814
44648_42	77597	1202436	0.010802	-1.9618	0.94796	0.0056671	0.044397
44652_15	77597	1208004	0.0094019	-2.0227	0.96924	0.0026058	0.044157
44705_48	77597	1353508	0.0092018	-2.0321	0.97074	-0.00016673	0.044025
44712_7	77597	1364787	0.012603	-1.894	0.856	0.012628	0.04488
44756_71	77597	1463077	0.0092018	-2.0321	0.97074	0.0053176	0.044347
44765_23	77597	1483148	0.015003	-1.8173	0.7073	0.011885	0.044766
44793_0	77597	1545249	0.0080016	-2.0933	0.97597	0.0036461	0.04422
44798_16	77597	1547208	0.0080016	-2.0933	0.97597	0.0010304	0.044017
44859_40	77597	1670093	0.0076015	-2.1158	0.97674	-0.00016955	0.043939
44893_36	77597	1762824	0.0072014	-2.1394	0.97721	-0.0012311	0.043918
44905_77	77597	1799719	0.0074015	-2.1275	0.97698	-0.00097679	0.043958
44910_22	77597	1804309	0.010202	-1.9869	0.96013	0.0018606	0.044022
44938_25	77597	1973443	0.010002	-1.9955	0.96326	-0.0024788	0.043906
44951_18	77597	2010016	0.0074015	-2.1275	0.97698	3.78e-05	0.043952
45004_31	77598	101957	0.0096019	-2.0135	0.96762	-0.0031978	0.043837
45007_10	77598	103443	0.011602	-1.9304	0.92034	0.0055172	0.04437
45079_57	77598	235667	0.010002	-1.9955	0.96326	-0.0035328	0.043872
45092_23	77598	261324	0.0088018	-2.0516	0.97316	-0.0024717	0.043917
45192_23	77598	494566	0.0080016	-2.0933	0.97597	-0.0032157	0.043843
45195_88	77598	496067	0.0088018	-2.0516	0.97316	0.0033713	0.044139
45200_18	77598	514639	0.0084017	-2.072	0.97491	-0.0011159	0.043947
45202_109	77598	520667	0.0084017	-2.072	0.97491	-0.0020964	0.043923
45238_0	77598	610862	0.0078016	-2.1044	0.97638	-5.34e-05	0.043958
45242_16	77598	619462	0.0090018	-2.0417	0.97213	-0.005487	0.043789
45262_71	77598	669043	0.0092018	-2.0321	0.97074	0.0050127	0.044283
45265_227	77598	672963	0.0086017	-2.0617	0.97407	-0.0027212	0.043843
45283_63	77598	706130	0.0094019	-2.0227	0.96924	-0.0054433	0.043778
45286_94	77598	710701	0.0070014	-2.1518	0.97739	-0.00093843	0.043907
45420_35	77598	1001170	0.0080016	-2.0933	0.97597	0.00051966	0.044023
45437_11	77598	1038790	0.011002	-1.9537	0.94359	-0.002307	0.043921
45455_2	77598	1072674	0.012603	-1.894	0.856	0.0053545	0.044361
45486_269	77598	1128518	0.010602	-1.97	0.95304	0.004627	0.044299
45492_109	77598	1132549	0.0090018	-2.0417	0.97213	-0.0018519	0.043929
45506_44	77598	1154033	0.009802	-2.0044	0.96577	-0.0056929	0.043763
45535_209	77598	1225237	0.010602	-1.97	0.95304	0.005519	0.044334
45613_51	77598	1384047	0.0088018	-2.0516	0.97316	-0.0037592	0.043853
45616_63	77598	1390575	0.009802	-2.0044	0.96577	-0.0052414	0.043764
45626_4	77598	1404496	0.011202	-1.9458	0.93712	-0.0040299	0.043825
45643_26	77598	1431832	0.010202	-1.9869	0.96013	0.00094531	0.044053
45646_366	77598	1432618	0.0088018	-2.0516	0.97316	0.0047405	0.044276
45674_3	77598	1492536	0.032206	-1.4778	0.39771	0.045258	0.047495
45680_166	77598	1503738	0.010802	-1.9618	0.94796	-0.0011054	0.043937
45691_47	77598	1536497	0.011802	-1.9229	0.91146	-0.0036527	0.043916
45727_137	77598	1641195	0.0088018	-2.0516	0.97316	-0.0012195	0.043982
45734_119	77598	1654329	0.0070014	-2.1518	0.97739	-0.001176	0.043945
45758_69	77598	1722572	0.010602	-1.97	0.95304	0.0038376	0.044245
45780_77	77598	1768391	0.010002	-1.9955	0.96326	-0.0012127	0.04398
45793_36	77598	1819748	0.009802	-2.0044	0.96577	-0.001696	0.043909
45807_29	77598	1864109	0.0078016	-2.1044	0.97638	-0.0013519	0.043894
45861_16	77599	7261	0.010202	-1.9869	0.96013	0.0069172	0.044416
45872_48	77599	36500	0.010002	-1.9955	0.96326	0.0056122	0.044242
45891_0	77599	87520	0.012402	-1.9011	0.87279	0.012565	0.044806
45911_39	77599	137853	0.0088018	-2.0516	0.97316	-0.0026987	0.043875
45934_102	77599	192819	0.0096019	-2.0135	0.96762	0.003829	0.044224
45942_33	77599	201054	0.011802	-1.9229	0.91146	-0.003157	0.043938
45957_5	77599	259066	0.0074015	-2.1275	0.97698	0.0021585	0.044056
45959_33	77599	259548	0.0094019	-2.0227	0.96924	-0.0025799	0.043843
45984_39	77599	305185	0.010802	-1.9618	0.94796	-0.0059711	0.043803
45997_13	77599	319828	0.010002	-1.9955	0.96326	0.0054821	0.044288
46016_2	77599	413666	0.011402	-1.938	0.9297	-0.0043005	0.043869
46035_103	77599	533773	0.010002	-1.9955	0.96326	-0.0039831	0.043803
46134_58	77599	785880	0.010802	-1.9618	0.94796	-0.0054651	0.043786
46142_61	77599	822770	0.011802	-1.9229	0.91146	-0.0064747	0.043785
46165_89	77599	860449	0.012202	-1.9082	0.88849	-0.0023118	0.043941
46178_12	77599	920067	0.013803	-1.854	0.7641	0.0081652	0.044562
46193_35	77599	989012	0.0094019	-2.0227	0.96924	-0.0042901	0.043817
46200_50	77599	1009730	0.012002	-1.9155	0.89977	0.0057709	0.044414
46259_124	77599	1202246	0.0058012	-2.234	0.97778	0.00027959	0.043942
46261_18	77599	1205178	0.010202	-1.9869	0.96013	-0.0036705	0.043864
46308_58	77604	40957	0.012603	-1.894	0.856	-0.0025019	0.043967
46311_40	77604	47272	0.0072014	-2.1394	0.97721	-0.0014713	0.043887
46394_50	77604	223266	0.012202	-1.9082	0.88849	-0.0060511	0.043809
46395_26	77604	226296	0.0092018	-2.0321	0.97074	-0.0021317	0.043955
46404_43	77604	257516	0.0094019	-2.0227	0.96924	-0.00047765	0.043943
46464_238	77604	375719	0.010202	-1.9869	0.96013	-0.0035863	0.043857
46471_30	77604	393152	0.0092018	-2.0321	0.97074	0.0019246	0.044083
46500_268	77604	471609	0.011002	-1.9537	0.94359	-0.004698	0.043814
46505_13	77604	484657	0.0096019	-2.0135	0.96762	-0.0039585	0.043835
46518_47	77604	499749	0.012402	-1.9011	0.87279	0.005211	0.044362
46565_51	77604	619827	0.011802	-1.9229	0.91146	-0.0067379	0.043769
46589_24	77604	659355	0.010602	-1.97	0.95304	-0.0075679	0.04372
46593_4	77604	662329	0.0088018	-2.0516	0.97316	-0.0024658	0.043877
46614_18	77604	695284	0.012202	-1.9082	0.88849	0.0038302	0.044236
46616_16	77604	702513	0.010602	-1.97	0.95304	-0.0019189	0.043953
46674_3	77604	831958	0.011802	-1.9229	0.91146	-0.0043565	0.043897
46702_43	77604	915407	0.0080016	-2.0933	0.97597	-0.0047641	0.043791
46727_65	77604	953159	0.011202	-1.9458	0.93712	0.0036916	0.044197
46767_217	77604	1033572	0.010202	-1.9869	0.96013	0.0050699	0.044286
46796_121	77604	1096766	0.010802	-1.9618	0.94796	-0.0034646	0.04386
46833_41	77604	1205624	0.0094019	-2.0227	0.96924	-0.00073957	0.043994
46838_73	77604	1219668	0.010602	-1.97	0.95304	-0.0044793	0.043836
46932_6	77605	79885	0.011002	-1.9537	0.94359	-0.0038345	0.043889
46937_46	77605	104368	0.0084017	-2.072	0.97491	0.0033733	0.044153
46942_88	77605	122038	0.0064013	-2.1909	0.97769	-0.00086773	0.0439
46962_30	77605	191829	0.0080016	-2.0933	0.97597	0.00070928	0.043967
46991_53	77605	225398	0.0080016	-2.0933	0.97597	-0.0010372	0.043941
47046_82	77605	298501	0.0074015	-2.1275	0.97698	0.00095503	0.044025
47057_4	77605	314426	0.012202	-1.9082	0.88849	0.0078126	0.044506
47068_6	77605	327601	0.009802	-2.0044	0.96577	0.0057511	0.044302
47079_37	77605	334590	0.015403	-1.8057	0.68067	0.014069	0.045014
47097_17	77605	366459	0.0058012	-2.234	0.97778	-0.0028712	0.043844
47103_12	77605	373649	0.019004	-1.7128	0.59569	0.020791	0.045466
47106_59	77605	379646	0.012202	-1.9082	0.88849	-0.0063975	0.043783
47141_256	77605	464192	0.012402	-1.9011	0.87279	0.0059199	0.044347
47147_65	77605	480567	0.012002	-1.9155	0.89977	-0.0025393	0.043899
47152_98	77605	492878	0.0060012	-2.2191	0.97775	-0.0028804	0.043812
47164_18	77605	516991	0.011202	-1.9458	0.93712	-0.00052391	0.044002
47208_6	77605	583001	0.010002	-1.9955	0.96326	-0.0024981	0.043871
47243_133	77605	650531	0.011002	-1.9537	0.94359	-0.0069102	0.043763
47335_29	77605	790434	0.0084017	-2.072	0.97491	0.0035671	0.04417
47338_3	77605	792702	0.014803	-1.8232	0.71572	0.015524	0.045108
47351_88	77605	839957	0.010002	-1.9955	0.96326	-0.0027578	0.043877
47372_153	77605	878964	0.0084017	-2.072	0.97491	0.00069718	0.043964
47384_149	77605	893659	0.011002	-1.9537	0.94359	-0.0036522	0.043873
47385_1	77605	893816	0.010402	-1.9783	0.95666	-0.0054219	0.043778
47395_107	77605	935396	0.0080016	-2.0933	0.97597	-0.0008259	0.043906
47403_56	77605	955245	0.0092018	-2.0321	0.97074	-0.0017738	0.04389
47404_158	77605	955466	0.010602	-1.97	0.95304	-0.0059381	0.043769
47406_45	77605	955631	0.0092018	-2.0321	0.97074	-0.0051297	0.043818
47429_21	77605	997997	0.0096019	-2.0135	0.96762	-0.0013589	0.043992
47574_111	77605	1273648	0.013003	-1.8803	0.82577	0.0052697	0.044389
47703_186	77605	1553521	0.0084017	-2.072	0.97491	-0.0041576	0.043812
47708_4	77605	1571784	0.012803	-1.8871	0.83958	-0.0061164	0.043788
47749_49	77605	1694788	0.0094019	-2.0227	0.96924	-0.0058494	0.043775
47795_46	77605	1795639	0.0086017	-2.0617	0.97407	-0.0016954	0.043898
47802_58	77605	1812869	0.0090018	-2.0417	0.97213	0.0029198	0.044122
47813_96	77605	1832974	0.0082016	-2.0825	0.97547	-0.0010721	0.043916
47862_87	77605	1958949	0.010602	-1.97	0.95304	-0.0039675	0.043874
47874_0	77605	2001786	0.009802	-2.0044	0.96577	-0.0028237	0.043865
47886_34	77605	2014275	0.010402	-1.9783	0.95666	0.0036925	0.044181
47893_9	77605	2022579	0.010802	-1.9618	0.94796	-0.0029055	0.043897
47930_0	77605	2101338	0.0076015	-2.1158	0.97674	-0.0013177	0.043943
47940_229	77605	2138997	0.010602	-1.97	0.95304	-0.0043677	0.04385
48002_97	77609	75852	0.018804	-1.7175	0.59904	0.018717	0.04518
48023_41	77609	108325	0.0066013	-2.1775	0.97761	0.0013823	0.043974
48047_12	77609	183426	0.013403	-1.8669	0.7887	0.0080798	0.044574
48074_97	77609	235719	0.015803	-1.7943	0.66071	0.014042	0.044922
48088_4	77609	248932	0.010402	-1.9783	0.95666	0.0079488	0.044492
48107_95	77609	306861	0.010802	-1.9618	0.94796	-0.0060047	0.043772
48113_99	77609	324719	0.011402	-1.938	0.9297	-0.0031081	0.043881
48131_31	77609	370203	0.0086017	-2.0617	0.97407	-0.0013065	0.043918
48146_266	77609	408312	0.009802	-2.0044	0.96577	0.0043946	0.044182
48210_146	77609	594249	0.0072014	-2.1394	0.97721	-0.0025887	0.043915
48218_107	77609	614219	0.011402	-1.938	0.9297	-0.0020009	0.043922
48256_0	77609	690250	0.010402	-1.9783	0.95666	-0.0012515	0.043946
48412_115	77609	1059007	0.011402	-1.938	0.9297	-0.0036199	0.043851
48448_122	77609	1140745	0.0088018	-2.0516	0.97316	0.0011995	0.044045
48478_14	77609	1197474	0.0084017	-2.072	0.97491	0.003935	0.044107
48586_40	77609	1439130	0.0088018	-2.0516	0.97316	-0.0026794	0.043853
48680_60	77616	181961	0.012202	-1.9082	0.88849	-0.002979	0.043892
48693_22	77616	230481	0.0074015	-2.1275	0.97698	-0.0032821	0.043795
48701_57	77616	246563	0.011002	-1.9537	0.94359	-0.0035469	0.043893
48705_0	77616	252238	0.0088018	-2.0516	0.97316	-0.00080983	0.04395
48732_7	77616	301210	0.011802	-1.9229	0.91146	0.0063524	0.044332
48737_21	77616	312264	0.0088018	-2.0516	0.97316	-0.0020804	0.043891
48751_10	77616	334838	0.011602	-1.9304	0.92034	-0.0064943	0.043757
48781_77	77616	390443	0.012202	-1.9082	0.88849	0.0056048	0.044345
48783_13	77616	391683	0.023205	-1.6242	0.51417	0.028503	0.046054
48791_52	77616	402882	0.020204	-1.6857	0.57804	0.019287	0.045305
48793_25	77616	410906	0.0096019	-2.0135	0.96762	0.00096503	0.044058
48890_32	77616	622453	0.0096019	-2.0135	0.96762	0.0030764	0.044144
48907_2	77616	636370	0.0088018	-2.0516	0.97316	-0.0035422	0.043846
48944_154	77616	656518	0.011402	-1.938	0.9297	-0.0024368	0.043922
48967_100	77616	725181	0.011402	-1.938	0.9297	4.84e-05	0.044031
49046_18	77616	922411	0.0074015	-2.1275	0.97698	0.000641	0.043996
49090_108	77616	995998	0.012603	-1.894	0.856	0.0068321	0.044354
49140_196	77616	1129683	0.0076015	-2.1158	0.97674	-0.0021111	0.043842
49209_48	77616	1280550	0.0090018	-2.0417	0.97213	0.0044248	0.044291
49235_18	77616	1355336	0.015003	-1.8173	0.7073	0.012137	0.044842
49243_54	77616	1394798	0.009802	-2.0044	0.96577	-0.0019763	0.043912
49316_148	77626	86700	0.0090018	-2.0417	0.97213	-0.0022417	0.043864
49343_332	77626	149779	0.014603	-1.8292	0.72669	0.013424	0.044851
49360_9	77626	184572	0.0082016	-2.0825	0.97547	-0.0021019	0.043894
49388_72	77626	233573	0.010002	-1.9955	0.96326	-0.0053159	0.043772
49399_37	77626	246258	0.011402	-1.938	0.9297	-0.0024929	0.043891
49488_8	77626	474718	0.0094019	-2.0227	0.96924	-0.0030035	0.043864
49493_88	77626	487490	0.010002	-1.9955	0.96326	-0.0019874	0.043948
49520_35	77626	530460	0.020204	-1.6857	0.57804	0.023697	0.045743
49593_36	77626	748680	0.011002	-1.9537	0.94359	0.0054556	0.044311
49620_83	77626	786076	0.0076015	-2.1158	0.97674	0.0021178	0.044099
49656_43	77626	877831	0.0092018	-2.0321	0.97074	0.0060766	0.044331
49661_0	77626	884818	0.0088018	-2.0516	0.97316	0.0014472	0.044041
49687_49	77626	934191	0.011602	-1.9304	0.92034	0.0075979	0.044433
49790_108	77626	1146489	0.010802	-1.9618	0.94796	-0.0011526	0.044144
49883_111	77626	1320453	0.0086017	-2.0617	0.97407	-0.00074934	0.043919
49895_44	77626	1340177	0.010002	-1.9955	0.96326	0.0040514	0.044176
49920_26	77626	1397752	0.011602	-1.9304	0.92034	0.00011915	0.04404
49933_28	77626	1416021	0.009802	-2.0044	0.96577	-0.0035024	0.043814
49944_5	77626	1431763	0.010402	-1.9783	0.95666	-0.0011701	0.043964
50038_35	77626	1633783	0.0090018	-2.0417	0.97213	0.00068541	0.044007
50057_0	77626	1665686	0.009802	-2.0044	0.96577	-0.0011297	0.043912
50062_53	77626	1675282	0.010602	-1.97	0.95304	-0.0003957	0.043991
50065_167	77626	1687743	0.0094019	-2.0227	0.96924	-0.00024701	0.043962
50069_23	77626	1688341	0.010402	-1.9783	0.95666	0.0058279	0.044343
50097_89	77626	1763941	0.011602	-1.9304	0.92034	-0.0036624	0.043861
50107_13	77626	1789504	0.0086017	-2.0617	0.97407	0.0025279	0.044111
50110_92	77626	1793372	0.010402	-1.9783	0.95666	-0.0043973	0.043842
50112_15	77626	1798410	0.0080016	-2.0933	0.97597	0.0023982	0.044061
50143_26	77626	1862740	0.010802	-1.9618	0.94796	-0.0025952	0.043873
50150_56	77626	1866111	0.009802	-2.0044	0.96577	-0.0010856	0.043937
50155_20	77626	1870910	0.0092018	-2.0321	0.97074	0.00087091	0.044004
50174_3	77626	1952639	0.010002	-1.9955	0.96326	-0.001582	0.043883
50259_116	77628	164547	0.0086017	-2.0617	0.97407	0.0046972	0.044278
50274_13	77628	181452	0.010002	-1.9955	0.96326	-0.0022634	0.043935
50281_147	77628	198751	0.013203	-1.8736	0.80772	-0.0073871	0.043774
50286_22	77628	222351	0.009802	-2.0044	0.96577	-0.0034895	0.043912
50294_53	77628	234822	0.0078016	-2.1044	0.97638	-0.0021234	0.043897
50338_73	77628	324807	0.0086017	-2.0617	0.97407	-0.0028753	0.043879
50346_179	77628	344904	0.0070014	-2.1518	0.97739	-0.00066912	0.043907
50355_74	77628	362565	0.010002	-1.9955	0.96326	0.0032507	0.044111
50404_117	77628	471089	0.010602	-1.97	0.95304	-0.0047285	0.043845
50412_21	77628	488278	0.0090018	-2.0417	0.97213	8.52e-05	0.044048
50430_24	77628	543410	0.011202	-1.9458	0.93712	-0.0028801	0.043908
50451_0	77628	579431	0.009802	-2.0044	0.96577	-0.0015584	0.043908
50482_1	77628	661268	0.0096019	-2.0135	0.96762	-0.0019859	0.04391
50548_137	77628	796434	0.0074015	-2.1275	0.97698	0.0019661	0.044044
50556_43	77628	804525	0.010602	-1.97	0.95304	-0.0022856	0.043912
50597_0	77628	908270	0.0086017	-2.0617	0.97407	-0.0033398	0.043895
50857_88	77628	1552931	0.012002	-1.9155	0.89977	-0.00478	0.043789
50904_3	77628	1634718	0.010402	-1.9783	0.95666	0.00316	0.044177
50958_54	77628	1760834	0.010002	-1.9955	0.96326	-0.0056122	0.043817
51047_10	77628	1986843	0.011202	-1.9458	0.93712	-0.0045051	0.043863
51084_163	77628	2099089	0.0092018	-2.0321	0.97074	-0.0040116	0.043803
51093_197	77628	2113200	0.0090018	-2.0417	0.97213	-0.0032944	0.043813
51118_63	77628	2171169	0.011402	-1.938	0.9297	-0.00056219	0.043964
51125_17	77628	2178779	0.0074015	-2.1275	0.97698	0.0021988	0.044101
51141_154	77628	2205911	0.0088018	-2.0516	0.97316	-0.0016604	0.043887
51208_23	77628	2335980	0.0082016	-2.0825	0.97547	-0.00011385	0.043966
51215_190	77628	2347663	0.009802	-2.0044	0.96577	-0.0036155	0.043938
51217_43	77628	2349231	0.0072014	-2.1394	0.97721	-0.001395	0.043865
51256_53	77628	2432673	0.0082016	-2.0825	0.97547	-0.00030153	0.043947
51285_14	77628	2484873	0.0086017	-2.0617	0.97407	-0.0014061	0.04389
51351_18	77629	183684	0.0086017	-2.0617	0.97407	0.0044837	0.04421
51361_10	77629	198287	0.0092018	-2.0321	0.97074	0.0037272	0.044139
51376_1	77629	205586	0.010002	-1.9955	0.96326	-0.0048859	0.043785
51385_36	77629	216613	0.0082016	-2.0825	0.97547	-0.003961	0.043836
51386_154	77629	216810	0.0072014	-2.1394	0.97721	-0.0010625	0.043902
51417_46	77629	275721	0.010602	-1.97	0.95304	0.0030632	0.044198
51447_63	77629	299282	0.0072014	-2.1394	0.97721	-0.0025215	0.043867
51536_59	77629	474680	0.0092018	-2.0321	0.97074	-0.0008984	0.043951
51566_10	77629	537247	0.010602	-1.97	0.95304	-0.0036172	0.043887
51585_8	77629	624649	0.010002	-1.9955	0.96326	-0.0046352	0.043796
51586_126	77629	624960	0.010202	-1.9869	0.96013	-0.0032683	0.04391
51612_86	77629	670251	0.0088018	-2.0516	0.97316	-0.0026746	0.043849
51633_6	77629	692548	0.0082016	-2.0825	0.97547	-0.0035105	0.043834
51646_136	77629	716369	0.010402	-1.9783	0.95666	0.0038231	0.044155
51673_21	77629	766211	0.011202	-1.9458	0.93712	0.0063257	0.044462
51710_0	77629	828294	0.0078016	-2.1044	0.97638	-0.0022905	0.043847
51739_71	77629	878294	0.010802	-1.9618	0.94796	-0.0040104	0.04384
51742_60	77629	889627	0.0086017	-2.0617	0.97407	-0.0053038	0.043768
51754_35	77629	920944	0.0092018	-2.0321	0.97074	-0.003376	0.043865
51770_119	77629	938269	0.011002	-1.9537	0.94359	-0.0026966	0.043901
51775_151	77629	947041	0.0092018	-2.0321	0.97074	0.0039923	0.044202
51841_2	77629	1097012	0.0096019	-2.0135	0.96762	-0.0013661	0.04392
51860_30	77629	1143308	0.012402	-1.9011	0.87279	0.0042532	0.044239
51882_28	77629	1176505	0.0078016	-2.1044	0.97638	-0.0053565	0.043764
51921_9	77629	1283336	0.0088018	-2.0516	0.97316	-0.0018194	0.043927
51958_120	77629	1338750	0.0074015	-2.1275	0.97698	0.001375	0.043996
51962_7	77629	1339378	0.0074015	-2.1275	0.97698	-0.0023453	0.04389
52019_28	77629	1438579	0.011002	-1.9537	0.94359	-0.00047853	0.043975
52054_94	77629	1485034	0.0086017	-2.0617	0.97407	0.0010135	0.044037
52093_26	77629	1538490	0.0090018	-2.0417	0.97213	0.0047711	0.044284
52102_13	77629	1558058	0.011202	-1.9458	0.93712	-0.0034678	0.043921
52113_58	77629	1572982	0.010402	-1.9783	0.95666	-0.0040091	0.043853
52114_40	77629	1573816	0.0096019	-2.0135	0.96762	0.0062216	0.044389
52218_60	77629	1756012	0.0086017	-2.0617	0.97407	0.0028435	0.04406
52259_17	77629	1851617	0.010002	-1.9955	0.96326	-0.0066868	0.043782
52280_118	77629	1897065	0.0094019	-2.0227	0.96924	-0.0018627	0.043901
52341_37	77629	2074896	0.015003	-1.8173	0.7073	0.014579	0.044922
52344_54	77629	2078678	0.011602	-1.9304	0.92034	0.0075192	0.044428
52348_6	77629	2093411	0.0092018	-2.0321	0.97074	-0.0032316	0.043848
52357_14	77629	2116499	0.0094019	-2.0227	0.96924	-0.0023008	0.043852
52379_42	77629	2159987	0.010002	-1.9955	0.96326	-0.0043958	0.043861
52382_45	77629	2172074	0.0078016	-2.1044	0.97638	-0.0015861	0.043908
52413_78	77629	2244515	0.010602	-1.97	0.95304	0.0057565	0.044298
52438_30	77629	2313070	0.011202	-1.9458	0.93712	-0.0044028	0.043891
52441_44	77629	2331977	0.0086017	-2.0617	0.97407	-0.0023043	0.043882
52466_265	77629	2408107	0.0080016	-2.0933	0.97597	-0.0013514	0.043885
52510_90	77629	2517512	0.0096019	-2.0135	0.96762	0.004985	0.044303
52511_45	77629	2517948	0.011002	-1.9537	0.94359	-0.0024367	0.043864
52527_10	77629	2606622	0.009802	-2.0044	0.96577	-0.0025891	0.043897
52579_160	77629	2813353	0.0086017	-2.0617	0.97407	-0.0033423	0.043858
52580_6	77629	2818804	0.0092018	-2.0321	0.97074	-0.0028415	0.04386
52617_47	77629	2902091	0.0080016	-2.0933	0.97597	0.00069558	0.04399
52621_125	77629	2903289	0.0094019	-2.0227	0.96924	-0.0046605	0.043841
52648_171	77631	1882	0.0090018	-2.0417	0.97213	-0.004478	0.043791
52669_7	77637	12566	0.011602	-1.9304	0.92034	-0.0036121	0.043865
52734_140	77637	152254	0.015003	-1.8173	0.7073	0.0093068	0.044621
52782_72	77637	271393	0.009802	-2.0044	0.96577	-0.0008386	0.043996
52799_25	77637	318873	0.0072014	-2.1394	0.97721	-0.0034194	0.043839
52814_122	77637	335936	0.0084017	-2.072	0.97491	-0.00030655	0.043959
52861_18	77637	413432	0.010802	-1.9618	0.94796	-0.0034877	0.043934
52968_117	77637	684592	0.0076015	-2.1158	0.97674	-0.0006488	0.043897
52975_15	77637	717165	0.010402	-1.9783	0.95666	-0.0041762	0.043829
53021_2	77637	801074	0.0092018	-2.0321	0.97074	-0.0030614	0.043897
53061_16	77637	873247	0.011402	-1.938	0.9297	-0.006901	0.043786
53063_178	77637	878588	0.010602	-1.97	0.95304	-0.0048967	0.043883
53066_86	77637	885607	0.0090018	-2.0417	0.97213	-0.0043275	0.04386
53087_21	77637	921380	0.012202	-1.9082	0.88849	0.010045	0.044645
53134_63	77637	1012277	0.0084017	-2.072	0.97491	0.0018641	0.04413
53170_27	77637	1085070	0.0096019	-2.0135	0.96762	-0.0056656	0.043787
53189_78	77637	1133457	0.010602	-1.97	0.95304	-0.0017665	0.043944
53280_175	77637	1317359	0.010002	-1.9955	0.96326	-0.0031657	0.043839
53301_131	77637	1342941	0.009802	-2.0044	0.96577	-0.0033878	0.043854
53303_90	77637	1343161	0.015003	-1.8173	0.7073	0.014606	0.044989
53315_146	77637	1376193	0.010202	-1.9869	0.96013	-0.0010455	0.043943
53348_9	77637	1475054	0.009802	-2.0044	0.96577	-0.0014977	0.043962
53353_76	77637	1479687	0.0094019	-2.0227	0.96924	0.004736	0.04424
53364_7	77637	1484640	0.0094019	-2.0227	0.96924	-0.00016677	0.043991
53509_29	77637	1933249	0.013403	-1.8669	0.7887	0.0069512	0.044474
53546_53	77637	2016018	0.0084017	-2.072	0.97491	-0.0040533	0.043825
53559_62	77637	2043837	0.010402	-1.9783	0.95666	-0.0011565	0.043928
53576_2	77637	2083521	0.010802	-1.9618	0.94796	-0.0009489	0.044004
53600_20	77637	2144347	0.0074015	-2.1275	0.97698	0.0025768	0.044082
53648_8	77637	2299450	0.0086017	-2.0617	0.97407	0.00063064	0.044027
53769_8	77638	20446	0.023005	-1.6281	0.52848	0.026745	0.045916
53780_13	77638	41470	0.010002	-1.9955	0.96326	0.0061131	0.044367
53793_43	77638	65121	0.0094019	-2.0227	0.96924	0.0060727	0.044412
53804_60	77638	98582	0.0084017	-2.072	0.97491	-0.00065295	0.043956
53844_58	77638	179917	0.0094019	-2.0227	0.96924	-0.0012494	0.043937
53854_169	77638	193133	0.013203	-1.8736	0.80772	-0.0044462	0.043863
53856_37	77638	205441	0.010202	-1.9869	0.96013	-0.0040318	0.04386
53948_18	77638	388987	0.0080016	-2.0933	0.97597	-0.0015908	0.043898
53949_4	77638	398396	0.010602	-1.97	0.95304	-0.0044739	0.043837
54041_21	77638	606066	0.011602	-1.9304	0.92034	0.0055013	0.044353
54048_8	77638	616925	0.0078016	-2.1044	0.97638	0.00066883	0.044019
54069_0	77638	661724	0.0096019	-2.0135	0.96762	-0.0020229	0.043902
54146_85	77638	827157	0.0080016	-2.0933	0.97597	0.00089702	0.043984
54173_6	77638	896040	0.0096019	-2.0135	0.96762	-0.0021868	0.043846
54210_51	77638	984112	0.009802	-2.0044	0.96577	-0.0014432	0.043921
54321_4	77638	1226812	0.0084017	-2.072	0.97491	-0.0039353	0.04383
54343_249	77638	1268368	0.011002	-1.9537	0.94359	-0.0031453	0.043868
54363_1	77638	1303799	0.015203	-1.8114	0.6868	0.011685	0.044706
54391_258	77638	1386231	0.012202	-1.9082	0.88849	-0.0054617	0.04376
54393_54	77638	1389791	0.0070014	-2.1518	0.97739	-0.0032496	0.043872
54492_126	77638	1620083	0.011602	-1.9304	0.92034	0.0010492	0.044082
54497_49	77638	1631783	0.0092018	-2.0321	0.97074	0.0030907	0.04413
54524_182	77638	1649125	0.0084017	-2.072	0.97491	0.00069129	0.043993
54550_66	77638	1696470	0.009802	-2.0044	0.96577	-2.07e-05	0.043989
54580_66	77638	1764215	0.012002	-1.9155	0.89977	-0.002935	0.043932
54583_133	77638	1764944	0.012603	-1.894	0.856	-0.0076531	0.043759
54592_154	77638	1774924	0.0092018	-2.0321	0.97074	-0.005568	0.043777
54637_77	77638	1870606	0.015403	-1.8057	0.68067	0.013347	0.044838
54714_227	77638	2009971	0.0058012	-2.234	0.97778	-0.001177	0.043876
54726_44	77638	2038484	0.0082016	-2.0825	0.97547	-0.00043593	0.043965
54757_89	77638	2087613	0.010002	-1.9955	0.96326	-0.0028948	0.04389
54764_179	77638	2092470	0.0084017	-2.072	0.97491	3.4e-05	0.043951
54778_2	77638	2120757	0.010002	-1.9955	0.96326	-0.002454	0.043925
54841_114	77638	2285300	0.015403	-1.8057	0.68067	0.014034	0.044995
54852_44	77638	2308890	0.010802	-1.9618	0.94796	-0.0025632	0.043885
55065_80	77639	492573	0.0090018	-2.0417	0.97213	0.0025795	0.044136
55096_76	77639	541071	0.011602	-1.9304	0.92034	-0.0026981	0.043879
55150_23	77639	647916	0.010602	-1.97	0.95304	0.0024228	0.044102
55202_132	77639	738698	0.011802	-1.9229	0.91146	-0.001052	0.04405
55203_90	77639	738927	0.0092018	-2.0321	0.97074	-0.0009475	0.043944
55207_62	77639	748260	0.0090018	-2.0417	0.97213	-0.0023662	0.043874
55241_37	77639	794174	0.011002	-1.9537	0.94359	-0.0040182	0.043829
55264_73	77639	828654	0.0096019	-2.0135	0.96762	-0.00095868	0.043986
55384_49	77639	1027423	0.010202	-1.9869	0.96013	0.0065146	0.044451
55405_84	77639	1056665	0.012002	-1.9155	0.89977	-0.0042861	0.04385
55442_72	77639	1130810	0.0066013	-2.1775	0.97761	-0.00064845	0.04393
55447_134	77639	1132662	0.010202	-1.9869	0.96013	-0.0003898	0.043938
55449_87	77639	1132890	0.012803	-1.8871	0.83958	0.0071611	0.044467
55512_8	77639	1278421	0.0082016	-2.0825	0.97547	-0.0021102	0.043864
55527_67	77639	1297183	0.012202	-1.9082	0.88849	0.0011936	0.044053
55528_4	77639	1301124	0.010202	-1.9869	0.96013	0.0071241	0.044406
55591_33	77639	1471537	0.0090018	-2.0417	0.97213	-0.005392	0.043828
55601_42	77639	1491222	0.011802	-1.9229	0.91146	-0.0017966	0.043938
55658_103	77639	1583576	0.0096019	-2.0135	0.96762	-0.0049392	0.043822
55662_11	77639	1589356	0.0084017	-2.072	0.97491	-0.0014668	0.043936
55763_87	77639	1826337	0.010402	-1.9783	0.95666	-0.0044596	0.043786
55783_154	77639	1862818	0.013003	-1.8803	0.82577	-0.0067636	0.043786
55797_89	77639	1888298	0.010002	-1.9955	0.96326	-0.0060547	0.043797
55807_14	77639	1893491	0.0096019	-2.0135	0.96762	0.0015817	0.044082
55826_69	77639	1944153	0.0096019	-2.0135	0.96762	-0.0029993	0.043908
55841_105	77639	1983428	0.009802	-2.0044	0.96577	3.03e-05	0.044046
55885_37	77639	2153774	0.0076015	-2.1158	0.97674	0.00075791	0.044022
55905_65	77639	2236201	0.0090018	-2.0417	0.97213	5.48e-05	0.043948
55908_13	77639	2251553	0.011402	-1.938	0.9297	0.0063212	0.044453
55927_40	77639	2283209	0.011202	-1.9458	0.93712	-0.0039304	0.043875
55942_2	77639	2322847	0.010402	-1.9783	0.95666	0.0016434	0.044047
55943_99	77639	2322955	0.018004	-1.7368	0.61803	0.015919	0.0451
55951_95	77639	2331277	0.010602	-1.97	0.95304	0.0048816	0.044212
55983_35	77640	30297	0.0084017	-2.072	0.97491	0.0038644	0.044187
56030_19	77640	144270	0.0066013	-2.1775	0.97761	-0.0039214	0.043821
56047_10	77640	174160	0.011002	-1.9537	0.94359	0.0054129	0.04428
56055_45	77640	187603	0.0088018	-2.0516	0.97316	-0.0030419	0.043862
56086_26	77640	236514	0.0076015	-2.1158	0.97674	-0.0009489	0.04392
56110_18	77640	338113	0.0088018	-2.0516	0.97316	-0.0010126	0.043935
56177_60	77640	443697	0.0082016	-2.0825	0.97547	-0.0031549	0.043868
56204_80	77640	506692	0.011002	-1.9537	0.94359	-0.0028639	0.043923
56222_82	77640	546365	0.009802	-2.0044	0.96577	-0.00095994	0.04396
56253_91	77640	594616	0.011002	-1.9537	0.94359	-0.0016099	0.043912
56289_60	77640	688951	0.0090018	-2.0417	0.97213	-0.0019095	0.043877
56315_177	77640	728884	0.011402	-1.938	0.9297	0.0084124	0.044429
56320_10	77640	734972	0.010002	-1.9955	0.96326	0.0018978	0.044096
56393_11	77640	877309	0.0090018	-2.0417	0.97213	-0.0017978	0.0439
56421_79	77640	922348	0.0094019	-2.0227	0.96924	-0.00086055	0.043969
56423_40	77640	924741	0.010802	-1.9618	0.94796	-0.00049701	0.04397
56426_22	77640	928189	0.011802	-1.9229	0.91146	-0.0027946	0.043895
56449_47	77640	979095	0.0078016	-2.1044	0.97638	-0.0011871	0.043918
56548_17	77640	1188099	0.010602	-1.97	0.95304	-0.0026098	0.043926
56577_124	77640	1261235	0.011802	-1.9229	0.91146	-0.0046258	0.043826
56588_104	77640	1306653	0.010402	-1.9783	0.95666	-0.0039157	0.043847
56600_13	77640	1316565	0.010402	-1.9783	0.95666	-0.0021648	0.043904
56649_44	77640	1439239	0.010802	-1.9618	0.94796	-0.0037699	0.043867
56718_2	77640	1600189	0.010202	-1.9869	0.96013	-0.0035746	0.043882
56771_12	77640	1784933	0.014803	-1.8232	0.71572	0.013271	0.044885
56785_74	77640	1833769	0.010602	-1.97	0.95304	-0.0017565	0.043934
56855_1	77640	1953528	0.0082016	-2.0825	0.97547	0.0028977	0.044096
56953_78	77640	2087278	0.012202	-1.9082	0.88849	0.0096544	0.044623
57003_99	77640	2194690	0.009802	-2.0044	0.96577	0.0038453	0.044145
57098_27	77640	2431033	0.0086017	-2.0617	0.97407	0.0021999	0.04408
57205_31	77644	102355	0.012202	-1.9082	0.88849	0.0070611	0.044418
57296_12	77644	346062	0.0094019	-2.0227	0.96924	-0.0064249	0.043737
57315_15	77644	426890	0.0092018	-2.0321	0.97074	-0.0050414	0.043812
57395_32	77644	669301	0.0092018	-2.0321	0.97074	9.16e-05	0.043953
57449_40	77644	833129	0.0086017	-2.0617	0.97407	-0.0013901	0.043958
57461_11	77644	877773	0.0094019	-2.0227	0.96924	0.00069073	0.04399
57468_14	77644	888796	0.010402	-1.9783	0.95666	-0.0039875	0.043864
57501_217	77644	943848	0.010202	-1.9869	0.96013	-0.0043602	0.043834
57548_18	77644	1050123	0.0072014	-2.1394	0.97721	-0.00042286	0.043947
57581_274	77644	1124012	0.010202	-1.9869	0.96013	0.004263	0.044205
57610_119	77644	1190777	0.0090018	-2.0417	0.97213	-0.0049713	0.043834
57733_3	77644	1449279	0.011402	-1.938	0.9297	-0.00041186	0.044001
57735_3	77644	1450565	0.0092018	-2.0321	0.97074	-0.00070394	0.043935
57752_1	77644	1494795	0.013003	-1.8803	0.82577	-0.0045812	0.043879
57775_11	77644	1563320	0.011602	-1.9304	0.92034	-0.0070923	0.043773
57791_32	77644	1595583	0.010002	-1.9955	0.96326	-0.0042807	0.043842
57877_36	77644	1731609	0.012402	-1.9011	0.87279	-0.001594	0.043996
57915_111	77644	1850872	0.0082016	-2.0825	0.97547	-0.0018373	0.043868
58013_149	77644	2050948	0.0092018	-2.0321	0.97074	0.0020678	0.04408
58020_49	77644	2079354	0.0076015	-2.1158	0.97674	-0.003938	0.043841
58032_7	77644	2086538	0.0080016	-2.0933	0.97597	-0.0031296	0.043825
58037_216	77644	2092003	0.010402	-1.9783	0.95666	-0.0025455	0.043945
58053_82	77644	2126438	0.011002	-1.9537	0.94359	0.000264	0.044003
58105_82	77644	2230328	0.0094019	-2.0227	0.96924	-0.0024116	0.043858
58109_167	77644	2237671	0.011402	-1.938	0.9297	-0.0061071	0.0438
58137_45	77644	2301322	0.009802	-2.0044	0.96577	-0.0025587	0.043885
58158_174	77644	2380142	0.013603	-1.8604	0.77662	-0.007323	0.043732
58162_6	77644	2386087	0.011802	-1.9229	0.91146	-0.0038593	0.043935
58249_32	77646	164674	0.011802	-1.9229	0.91146	0.0034345	0.044183
58311_19	77646	268144	0.0090018	-2.0417	0.97213	-0.0019564	0.043878
58314_28	77646	269187	0.010002	-1.9955	0.96326	0.0034374	0.044159
58329_15	77646	296592	0.0074015	-2.1275	0.97698	-0.0032798	0.043876
58363_143	77646	351237	0.0096019	-2.0135	0.96762	-0.0016201	0.04389
58442_77	77646	489871	0.010002	-1.9955	0.96326	0.0043096	0.044198
58448_27	77646	506501	0.0082016	-2.0825	0.97547	-0.00066283	0.044002
58481_66	77646	602768	0.010002	-1.9955	0.96326	-0.00095545	0.04393
58489_80	77646	608909	0.011802	-1.9229	0.91146	-0.0033596	0.043866
58536_32	77646	701368	0.0082016	-2.0825	0.97547	7.67e-06	0.043929
58552_24	77646	733204	0.011602	-1.9304	0.92034	0.0045595	0.044288
58587_16	77646	793765	0.0092018	-2.0321	0.97074	-0.0029025	0.0439
58606_154	77646	883988	0.009802	-2.0044	0.96577	-0.0025354	0.043939
58638_84	77646	952253	0.0096019	-2.0135	0.96762	-0.0031106	0.043892
58685_17	77646	1003930	0.010202	-1.9869	0.96013	-0.0046408	0.043807
58693_150	77646	1018140	0.0092018	-2.0321	0.97074	-0.00093861	0.04392
58747_176	77646	1146770	0.015603	-1.8	0.66537	0.016674	0.045185
58748_142	77646	1147095	0.012402	-1.9011	0.87279	-0.0027371	0.043919
58772_163	77646	1177986	0.0086017	-2.0617	0.97407	-0.002079	0.043891
58799_45	77646	1225301	0.012402	-1.9011	0.87279	-0.0041821	0.043819
58813_28	77646	1251053	0.010002	-1.9955	0.96326	0.0036812	0.044233
58816_37	77646	1275984	0.0096019	-2.0135	0.96762	-0.0033829	0.04384
58866_8	77646	1372716	0.009802	-2.0044	0.96577	0.0052986	0.044304
58870_15	77646	1377264	0.0084017	-2.072	0.97491	0.0029089	0.044089
58884_39	77646	1398449	0.0092018	-2.0321	0.97074	0.0026978	0.044093
58893_58	77646	1429368	0.0096019	-2.0135	0.96762	0.0038633	0.044176
58903_9	77646	1437907	0.016003	-1.7888	0.65098	0.014201	0.044927
58916_90	77646	1452388	0.010202	-1.9869	0.96013	-0.0046731	0.043818
58920_64	77646	1456419	0.0054011	-2.2652	0.97783	-0.0011766	0.043871
58921_45	77646	1456535	0.0082016	-2.0825	0.97547	-0.0018769	0.043878
58931_28	77646	1470547	0.0088018	-2.0516	0.97316	0.0058934	0.044323
58934_200	77646	1472616	0.0084017	-2.072	0.97491	0.0025312	0.044172
58968_48	77646	1564168	0.010602	-1.97	0.95304	0.0015583	0.044121
58978_47	77646	1597488	0.0082016	-2.0825	0.97547	0.0031334	0.044177
58983_8	77646	1607700	0.0092018	-2.0321	0.97074	-0.0029049	0.04387
58989_7	77646	1636213	0.012402	-1.9011	0.87279	-0.0032417	0.043919
59002_11	77646	1705723	0.011002	-1.9537	0.94359	-0.00060138	0.043988
59005_65	77646	1719467	0.014403	-1.8353	0.73682	0.013012	0.044862
59008_41	77646	1719775	0.011402	-1.938	0.9297	0.010228	0.044728
59026_77	77646	1745668	0.010602	-1.97	0.95304	-0.0023251	0.043969
59059_0	77646	1799356	0.010602	-1.97	0.95304	-0.0039932	0.043815
59099_45	77646	1876946	0.0088018	-2.0516	0.97316	-0.0035347	0.043833
59114_107	77646	1899502	0.0080016	-2.0933	0.97597	-0.0015089	0.043911
59185_38	77646	2058793	0.0076015	-2.1158	0.97674	0.00070314	0.044043
59189_48	77646	2062947	0.0066013	-2.1775	0.97761	0.0013945	0.044012
59279_75	77646	2213990	0.0096019	-2.0135	0.96762	-0.0049485	0.04377
59319_99	77646	2289303	0.0090018	-2.0417	0.97213	0.005359	0.044321
59334_98	77646	2307618	0.0094019	-2.0227	0.96924	-0.0054361	0.043785
59347_5	77646	2353828	0.0088018	-2.0516	0.97316	0.0012777	0.044033
59359_135	77646	2384113	0.0062012	-2.2048	0.97774	-0.00028384	0.043924
59370_26	77646	2397955	0.0076015	-2.1158	0.97674	0.0005299	0.043946
59397_12	77646	2455590	0.0066013	-2.1775	0.97761	0.001038	0.044003
59413_293	77646	2508990	0.020404	-1.6813	0.57053	0.021981	0.045576
59448_41	77646	2586058	0.012402	-1.9011	0.87279	0.0050873	0.04439
59470_6	77646	2623403	0.011002	-1.9537	0.94359	-0.0053652	0.043782
59474_153	77646	2625061	0.011802	-1.9229	0.91146	-0.0041579	0.043867
59491_35	77646	2656761	0.0080016	-2.0933	0.97597	-0.00025585	0.043976
59508_2	77646	2698958	0.0092018	-2.0321	0.97074	-0.0024047	0.043891
59524_116	77646	2718033	0.013003	-1.8803	0.82577	0.0084714	0.04454
59533_27	77646	2738743	0.0088018	-2.0516	0.97316	-0.0023217	0.043874
59542_59	77646	2756416	0.010602	-1.97	0.95304	-0.0036403	0.043867
59566_8	77646	2793198	0.0092018	-2.0321	0.97074	0.0028901	0.044116
59679_16	77650	174495	0.010202	-1.9869	0.96013	-0.0014095	0.043951
59831_17	77650	449003	0.0082016	-2.0825	0.97547	0.0042189	0.044213
59938_43	77650	704046	0.010402	-1.9783	0.95666	0.0051323	0.044282
60039_17	77650	965067	0.0088018	-2.0516	0.97316	-0.0023741	0.04389
60042_65	77650	971021	0.0082016	-2.0825	0.97547	-0.0012269	0.04391
60059_31	77650	1000533	0.0088018	-2.0516	0.97316	0.0020333	0.044064
60073_96	77650	1021167	0.0086017	-2.0617	0.97407	-0.0019091	0.04389
60078_43	77650	1024025	0.010602	-1.97	0.95304	-0.0050584	0.04377
60081_5	77650	1024110	0.0078016	-2.1044	0.97638	0.00065591	0.043988
60086_50	77650	1037020	0.0078016	-2.1044	0.97638	-6.89e-05	0.043983
60120_125	77650	1107564	0.010002	-1.9955	0.96326	-0.0026404	0.043867
60175_26	77650	1213739	0.0096019	-2.0135	0.96762	-0.0016847	0.04388
60221_91	77650	1332666	0.0070014	-2.1518	0.97739	-0.0016364	0.043918
60239_37	77650	1411003	0.0094019	-2.0227	0.96924	-0.0038066	0.04386
60242_0	77650	1420309	0.013803	-1.854	0.7641	0.012208	0.044811
60252_65	77650	1464595	0.0088018	-2.0516	0.97316	-0.0021223	0.043905
60254_50	77650	1465528	0.011802	-1.9229	0.91146	-0.0013056	0.043958
60267_37	77650	1473996	0.009802	-2.0044	0.96577	-0.0018948	0.04393
60279_170	77650	1496738	0.010802	-1.9618	0.94796	0.005693	0.044365
60297_29	77650	1524774	0.012402	-1.9011	0.87279	-0.0025134	0.044002
60393_34	77650	1762085	0.012202	-1.9082	0.88849	-0.0026856	0.043963
60401_1	77650	1774173	0.0070014	-2.1518	0.97739	-0.0014057	0.043873
60407_26	77650	1782643	0.0092018	-2.0321	0.97074	0.0018027	0.044059
60450_61	77650	1889025	0.0064013	-2.1909	0.97769	0.00012145	0.043973
60485_101	77653	23102	0.0090018	-2.0417	0.97213	-0.0013685	0.043945
60508_27	77653	61495	0.009802	-2.0044	0.96577	-0.0045247	0.043819
60538_0	77653	115944	0.010602	-1.97	0.95304	0.0055284	0.044353
60556_202	77653	143963	0.015803	-1.7943	0.66071	0.016815	0.045185
60562_40	77653	153152	0.009802	-2.0044	0.96577	0.0056841	0.044294
60591_20	77653	215642	0.013403	-1.8669	0.7887	0.012495	0.044827
60593_2	77653	219451	0.0092018	-2.0321	0.97074	0.0038152	0.044169
60630_31	77653	305792	0.0084017	-2.072	0.97491	-0.0013737	0.043883
60676_54	77653	420248	0.010802	-1.9618	0.94796	0.0073657	0.044391
60701_15	77653	470412	0.011202	-1.9458	0.93712	-0.0031931	0.043912
60728_19	77653	580592	0.009802	-2.0044	0.96577	-0.00035821	0.043983
60760_37	77653	632801	0.013203	-1.8736	0.80772	-0.0038813	0.043844
60787_27	77653	672363	0.012603	-1.894	0.856	-0.00279	0.043944
60840_42	77653	808814	0.012002	-1.9155	0.89977	0.0046899	0.044331
60851_112	77653	824117	0.0096019	-2.0135	0.96762	-0.0032183	0.043871
60853_62	77653	828784	0.011002	-1.9537	0.94359	-0.0057832	0.043785
60944_85	77653	1079680	0.010002	-1.9955	0.96326	-0.0051239	0.043794
60987_70	77653	1163477	0.011002	-1.9537	0.94359	-0.0049863	0.043801
60995_12	77653	1176885	0.0092018	-2.0321	0.97074	-0.0019792	0.043874
61061_50	77653	1397275	0.010402	-1.9783	0.95666	0.0053861	0.04433
61106_210	77653	1479660	0.012603	-1.894	0.856	0.0084792	0.044547
61128_85	77653	1505496	0.0074015	-2.1275	0.97698	-0.00058871	0.043894
61181_136	77653	1631817	0.009802	-2.0044	0.96577	-0.0012781	0.043936
61316_57	77653	1867071	0.011202	-1.9458	0.93712	-0.0037825	0.043839
61324_15	77655	5222	0.0086017	-2.0617	0.97407	0.00049011	0.044054
61347_42	77655	36712	0.0070014	-2.1518	0.97739	0.0011451	0.043989
61367_109	77655	75739	0.011602	-1.9304	0.92034	-0.005773	0.043811
61388_1	77655	111990	0.010002	-1.9955	0.96326	-0.0048476	0.043802
61411_21	77655	157529	0.011602	-1.9304	0.92034	0.006269	0.044424
61430_10	77655	225127	0.0076015	-2.1158	0.97674	-0.00081084	0.043904
61432_42	77655	225788	0.0088018	-2.0516	0.97316	0.00012162	0.044027
61433_55	77655	225892	0.0074015	-2.1275	0.97698	-0.0035164	0.043829
61434_1	77655	226119	0.0090018	-2.0417	0.97213	0.0013146	0.044038
61451_135	77655	266703	0.013203	-1.8736	0.80772	0.010307	0.044672
61462_141	77655	277278	0.010602	-1.97	0.95304	-0.00032802	0.043938
61490_32	77655	336316	0.0084017	-2.072	0.97491	-0.0023728	0.043891
61497_4	77655	344151	0.011602	-1.9304	0.92034	-0.00335	0.043893
61499_39	77655	352437	0.011402	-1.938	0.9297	-0.0041889	0.043876
61551_11	77655	504996	0.0088018	-2.0516	0.97316	0.0046134	0.044248
61564_126	77655	525076	0.0072014	-2.1394	0.97721	-0.00042397	0.043947
61571_154	77655	534221	0.010602	-1.97	0.95304	-0.0054182	0.043806
61575_28	77655	538250	0.011002	-1.9537	0.94359	-0.0040296	0.043863
61619_60	77655	641957	0.011002	-1.9537	0.94359	0.0026521	0.044084
61625_42	77655	646088	0.0086017	-2.0617	0.97407	-0.0030926	0.043829
61629_5	77655	653800	0.0088018	-2.0516	0.97316	-0.0052184	0.043805
61641_78	77655	676136	0.010402	-1.9783	0.95666	-0.0030714	0.043864
61669_16	77655	720065	0.013203	-1.8736	0.80772	0.010816	0.044669
61678_37	77655	756639	0.0088018	-2.0516	0.97316	-0.0030652	0.043834
61686_26	77655	761357	0.0094019	-2.0227	0.96924	-0.0020449	0.043946
61724_54	77655	844684	0.011802	-1.9229	0.91146	0.0094444	0.044627
61771_10	77655	967126	0.0066013	-2.1775	0.97761	-0.0014655	0.043873
61803_141	77655	1064264	0.0094019	-2.0227	0.96924	-0.0029873	0.04386
61865_128	77655	1191216	0.013603	-1.8604	0.77662	-0.0042774	0.043863
61870_57	77655	1194979	0.0088018	-2.0516	0.97316	-0.0034116	0.043847
61903_2	77655	1257624	0.0096019	-2.0135	0.96762	-0.00059423	0.043952
61912_29	77655	1265450	0.012402	-1.9011	0.87279	-0.0060592	0.043789
61948_65	77655	1348805	0.011802	-1.9229	0.91146	-0.00088001	0.043992
61952_19	77655	1356492	0.010802	-1.9618	0.94796	-0.0021936	0.043926
61979_56	77655	1429273	0.009802	-2.0044	0.96577	-0.0062171	0.043774
61998_259	77655	1475720	0.010402	-1.9783	0.95666	-0.0045658	0.043792
62008_23	77655	1481438	0.012002	-1.9155	0.89977	-0.0052042	0.043834
62010_53	77655	1483331	0.0082016	-2.0825	0.97547	-0.0021329	0.043896
62031_7	77655	1541997	0.0094019	-2.0227	0.96924	-0.0026677	0.043917
62063_34	77655	1611522	0.0090018	-2.0417	0.97213	-0.0048646	0.043809
62068_141	77655	1612771	0.010202	-1.9869	0.96013	-0.004203	0.043836
62101_10	77655	1695036	0.010602	-1.97	0.95304	-0.005785	0.043805
62149_57	77655	1898571	0.012402	-1.9011	0.87279	0.009532	0.044532
62160_17	77655	1908786	0.0092018	-2.0321	0.97074	-0.0036824	0.043843
62163_13	77655	1910864	0.011402	-1.938	0.9297	-0.0034425	0.043851
62181_41	77655	1958748	0.011602	-1.9304	0.92034	-0.0049274	0.043835
62346_2	77655	2534179	0.010202	-1.9869	0.96013	0.0039881	0.044206
62491_51	77656	85000	0.0068014	-2.1644	0.97751	0.0035956	0.044126
62530_202	77656	164579	0.0096019	-2.0135	0.96762	0.0032408	0.044177
62579_16	77656	265968	0.010802	-1.9618	0.94796	-0.00046485	0.043942
62612_20	77656	352237	0.010602	-1.97	0.95304	-0.0046043	0.043832
62625_100	77656	389802	0.010202	-1.9869	0.96013	0.00031849	0.043993
62628_4	77656	391618	0.010802	-1.9618	0.94796	-0.0017564	0.04391
62639_0	77656	400772	0.0092018	-2.0321	0.97074	-0.0019295	0.043917
62646_104	77656	406097	0.011202	-1.9458	0.93712	-0.0047209	0.043873
62778_30	77656	748121	0.013603	-1.8604	0.77662	-0.0033221	0.043878
62781_48	77656	749202	0.011002	-1.9537	0.94359	0.0059631	0.044355
62867_4	77656	908447	0.0078016	-2.1044	0.97638	0.0019195	0.044044
62895_81	77656	988340	0.0092018	-2.0321	0.97074	-0.0021686	0.043889
62925_23	77656	1103746	0.0078016	-2.1044	0.97638	-0.002068	0.043862
62936_59	77656	1119762	0.011202	-1.9458	0.93712	0.0044213	0.044264
62970_175	77656	1180395	0.0086017	-2.0617	0.97407	8.07e-05	0.043968
62975_26	77656	1197100	0.010602	-1.97	0.95304	0.0015095	0.044063
62987_39	77656	1234951	0.010802	-1.9618	0.94796	-0.004684	0.043837
62993_24	77656	1252050	0.0084017	-2.072	0.97491	-0.00013921	0.043924
62999_119	77656	1259430	0.011402	-1.938	0.9297	0.0077231	0.044526
63032_40	77656	1299283	0.011802	-1.9229	0.91146	-0.0055421	0.043787
63055_165	77656	1418779	0.009802	-2.0044	0.96577	-0.0022846	0.043973
63088_93	77656	1483311	0.0092018	-2.0321	0.97074	-0.0030829	0.043896
63121_111	77656	1539916	0.0090018	-2.0417	0.97213	0.00079632	0.044038
63140_106	77656	1602344	0.0096019	-2.0135	0.96762	-0.0052268	0.043791
63148_40	77656	1624323	0.009802	-2.0044	0.96577	-0.00145	0.043997
63245_65	77656	1850902	0.0082016	-2.0825	0.97547	-0.0046629	0.043765
63252_57	77656	1857792	0.0072014	-2.1394	0.97721	0.0022699	0.044042
63265_180	77656	1881442	0.009802	-2.0044	0.96577	-0.001602	0.043956
63284_75	77656	1927189	0.013003	-1.8803	0.82577	-0.0045539	0.04384
63294_11	77656	1957494	0.0078016	-2.1044	0.97638	0.00067401	0.043997
63339_12	77656	2078494	0.0092018	-2.0321	0.97074	-0.0033366	0.043869
63346_38	77656	2090617	0.0094019	-2.0227	0.96924	0.0061391	0.044306
63381_26	77656	2157170	0.011202	-1.9458	0.93712	-0.0030207	0.0439
63427_112	77656	2193600	0.010002	-1.9955	0.96326	0.0052021	0.044281
63467_28	77656	2279592	0.011002	-1.9537	0.94359	0.0042021	0.044238
63475_220	77656	2288734	0.010802	-1.9618	0.94796	0.0028262	0.044144
63489_56	77656	2299201	0.0096019	-2.0135	0.96762	-0.003083	0.043856
63524_53	77656	2366556	0.013803	-1.854	0.7641	0.013469	0.044927
63555_146	77656	2436470	0.010602	-1.97	0.95304	0.0025	0.044112
63554_30	77656	2436580	0.010202	-1.9869	0.96013	-0.0042707	0.043817
63564_23	77656	2457997	0.011202	-1.9458	0.93712	-0.0061306	0.043806
63642_82	77656	2671913	0.012603	-1.894	0.856	0.0063917	0.044374
63653_62	77656	2686579	0.0076015	-2.1158	0.97674	-0.00055479	0.043981
63716_40	77656	2902359	0.0082016	-2.0825	0.97547	-0.0003027	0.043992
63720_68	77656	2931305	0.0072014	-2.1394	0.97721	0.0019922	0.044044
63754_44	77656	2999101	0.0072014	-2.1394	0.97721	-0.0024572	0.043895
63829_31	77656	3146717	0.0080016	-2.0933	0.97597	-0.0020009	0.043867
63836_171	77656	3154458	0.010802	-1.9618	0.94796	0.0057188	0.044307
63921_165	77656	3342314	0.010602	-1.97	0.95304	-0.0070015	0.043756
63961_111	77657	19448	0.010402	-1.9783	0.95666	-0.0047236	0.043834
64005_10	77657	161126	0.011402	-1.938	0.9297	-0.0031338	0.043916
64016_20	77657	201151	0.0094019	-2.0227	0.96924	-0.0032116	0.043817
64027_31	77657	222930	0.0096019	-2.0135	0.96762	-0.0040399	0.043822
64041_105	77657	251832	0.029006	-1.5247	0.4197	0.035974	0.04679
64069_76	77657	330438	0.0096019	-2.0135	0.96762	-0.0022831	0.04388
64070_12	77657	330797	0.0086017	-2.0617	0.97407	-0.0048226	0.043781
64071_58	77657	330874	0.0088018	-2.0516	0.97316	4.31e-06	0.043968
64073_27	77657	331531	0.0088018	-2.0516	0.97316	0.00023583	0.04399
64149_176	77657	488153	0.0096019	-2.0135	0.96762	0.0062567	0.044357
64155_90	77657	497829	0.012402	-1.9011	0.87279	-0.0046803	0.043798
64169_130	77657	542017	0.0074015	-2.1275	0.97698	-0.0021231	0.043891
64171_11	77657	550892	0.009802	-2.0044	0.96577	-0.0029844	0.043851
64188_19	77657	597093	0.0088018	-2.0516	0.97316	-0.0016982	0.043908
64225_58	77657	675508	0.0084017	-2.072	0.97491	-0.0043025	0.043817
64235_5	77657	693269	0.009802	-2.0044	0.96577	0.0050798	0.044297
64246_2	77657	732285	0.0080016	-2.0933	0.97597	-0.0018092	0.043925
64257_78	77657	762973	0.0090018	-2.0417	0.97213	-0.0039094	0.043887
64266_32	77657	784068	0.0078016	-2.1044	0.97638	-0.0027133	0.043876
64288_9	77657	830678	0.010402	-1.9783	0.95666	0.0062863	0.044327
64304_15	77657	875296	0.009802	-2.0044	0.96577	-0.0039587	0.043818
64366_20	77657	1050144	0.015003	-1.8173	0.7073	0.0095275	0.044516
64421_99	77657	1188515	0.0094019	-2.0227	0.96924	-0.0042724	0.043827
64430_149	77657	1198983	0.0090018	-2.0417	0.97213	0.0022894	0.044082
64444_53	77657	1222649	0.0066013	-2.1775	0.97761	0.0010206	0.043999
64520_17	77657	1400216	0.0088018	-2.0516	0.97316	-0.0019757	0.043873
64533_92	77657	1445246	0.010602	-1.97	0.95304	-0.00097896	0.043946
64542_116	77657	1501513	0.0082016	-2.0825	0.97547	-0.00052825	0.043901
64557_150	77657	1601430	0.010602	-1.97	0.95304	-0.001155	0.043989
64571_103	77657	1642362	0.010402	-1.9783	0.95666	-0.0029241	0.043867
64660_29	77657	1881944	0.011802	-1.9229	0.91146	0.0070804	0.044318
64665_2	77657	1882790	0.0096019	-2.0135	0.96762	0.0001848	0.044007
64923_56	77657	2634185	0.011402	-1.938	0.9297	-0.002322	0.043902
64958_165	77657	2793431	0.011002	-1.9537	0.94359	0.0036571	0.044236
64966_11	77657	2817005	0.010202	-1.9869	0.96013	-0.0025232	0.043887
64977_97	77657	2847748	0.011002	-1.9537	0.94359	-0.0042319	0.043821
65013_37	77665	13013	0.0090018	-2.0417	0.97213	0.003199	0.044179
65028_289	77665	37665	0.0088018	-2.0516	0.97316	-0.00012771	0.043987
65067_22	77665	148811	0.0084017	-2.072	0.97491	0.0013409	0.044061
65100_72	77665	227479	0.0064013	-2.1909	0.97769	0.0013302	0.044012
65113_155	77665	265771	0.0084017	-2.072	0.97491	0.0014875	0.044007
65138_28	77665	346557	0.0080016	-2.0933	0.97597	-0.0015171	0.043918
65204_131	77665	499144	0.0096019	-2.0135	0.96762	-0.0046776	0.043807
65235_142	77665	573608	0.0094019	-2.0227	0.96924	0.0030663	0.044131
65237_37	77665	576829	0.011402	-1.938	0.9297	-0.0057347	0.043851
65289_124	77665	808921	0.0092018	-2.0321	0.97074	-0.001327	0.043937
65310_130	77665	838365	0.010002	-1.9955	0.96326	-0.0035649	0.043825
65324_92	77665	854818	0.010602	-1.97	0.95304	0.0060399	0.044356
65344_0	77665	881320	0.0076015	-2.1158	0.97674	-0.00035318	0.043918
65450_71	77665	1215924	0.0076015	-2.1158	0.97674	0.0006429	0.044005
65454_70	77665	1224541	0.011802	-1.9229	0.91146	-0.0031754	0.043882
65462_39	77665	1243493	0.0082016	-2.0825	0.97547	0.0012896	0.044043
65485_16	77665	1291589	0.0074015	-2.1275	0.97698	-0.0016442	0.043888
65505_61	77665	1367737	0.0080016	-2.0933	0.97597	-0.0028377	0.043862
65520_4	77665	1405289	0.010202	-1.9869	0.96013	-0.00075731	0.043975
65526_22	77665	1409455	0.0080016	-2.0933	0.97597	-0.0021199	0.043906
65537_45	77665	1447708	0.010202	-1.9869	0.96013	0.0035159	0.044219
65547_0	77665	1489012	0.0072014	-2.1394	0.97721	0.0011506	0.043996
65597_255	77665	1589898	0.0088018	-2.0516	0.97316	0.0037852	0.044205
65622_51	77665	1660000	0.011402	-1.938	0.9297	-0.0044025	0.043849
65625_80	77665	1665514	0.012202	-1.9082	0.88849	0.0010401	0.044051
65640_13	77665	1680772	0.0074015	-2.1275	0.97698	0.00080974	0.043991
65649_9	77665	1695393	0.0086017	-2.0617	0.97407	-0.0012506	0.043987
65651_203	77665	1712316	0.010202	-1.9869	0.96013	-0.0018994	0.043918
65783_28	77665	1817393	0.009802	-2.0044	0.96577	-0.0042617	0.043836
65827_30	77665	1890139	0.011402	-1.938	0.9297	0.0031581	0.044238
65828_73	77665	1890249	0.010002	-1.9955	0.96326	0.0058845	0.044316
65864_93	77665	2012468	0.0088018	-2.0516	0.97316	-0.00014788	0.043972
65869_65	77665	2019626	0.0090018	-2.0417	0.97213	-0.00049205	0.043951
65880_4	77665	2036219	0.0072014	-2.1394	0.97721	0.0010035	0.043984
65881_33	77665	2036263	0.015403	-1.8057	0.68067	0.015732	0.045088
65895_66	77665	2079841	0.0070014	-2.1518	0.97739	-0.0013348	0.043898
65910_155	77665	2116477	0.010602	-1.97	0.95304	-0.0031565	0.043843
65938_74	77665	2150978	0.0082016	-2.0825	0.97547	-0.0013802	0.043933
65960_13	77665	2194692	0.010002	-1.9955	0.96326	-0.0026913	0.043898
66017_2	77665	2323366	0.012202	-1.9082	0.88849	-0.0042716	0.043884
66025_54	77665	2346521	0.011202	-1.9458	0.93712	-0.0034799	0.043861
66035_107	77665	2370799	0.013603	-1.8604	0.77662	0.010749	0.044709
66052_18	77665	2411189	0.010802	-1.9618	0.94796	0.0053772	0.044332
66128_42	77665	2557898	0.011402	-1.938	0.9297	0.0080333	0.044466
66137_72	77665	2568370	0.0090018	-2.0417	0.97213	-0.0049827	0.043857
66182_26	77665	2671757	0.0054011	-2.2652	0.97783	-0.00027997	0.043939
66212_15	77665	2759775	0.012202	-1.9082	0.88849	0.0028416	0.044119
66259_0	77665	2901258	0.010202	-1.9869	0.96013	0.0061536	0.044337
66338_48	77665	3090894	0.011002	-1.9537	0.94359	-0.002838	0.04387
66380_2	77665	3238926	0.009802	-2.0044	0.96577	-0.00023013	0.043984
66462_2	77667	46554	0.010002	-1.9955	0.96326	-0.0054688	0.043805
66574_182	77667	332254	0.009802	-2.0044	0.96577	-0.0059174	0.043751
66613_152	77667	393729	0.015203	-1.8114	0.6868	0.0046855	0.044372
66657_51	77667	451172	0.010202	-1.9869	0.96013	-0.0031534	0.043941
66692_17	77667	539790	0.009802	-2.0044	0.96577	-0.0052353	0.043799
66696_58	77667	546040	0.010402	-1.9783	0.95666	-0.0043337	0.043817
66746_5	77667	666564	0.0092018	-2.0321	0.97074	-0.0031944	0.043822
66789_0	77667	791398	0.0064013	-2.1909	0.97769	-0.0010574	0.04392
66851_71	77667	997404	0.010602	-1.97	0.95304	-0.0038954	0.043859
66854_86	77667	999253	0.013003	-1.8803	0.82577	0.01114	0.044784
66856_23	77667	999425	0.0068014	-2.1644	0.97751	0.002511	0.044077
66923_14	77667	1216563	0.0096019	-2.0135	0.96762	-0.0002761	0.04401
66947_282	77667	1272061	0.010602	-1.97	0.95304	-0.0055821	0.043775
66963_36	77667	1312737	0.0078016	-2.1044	0.97638	0.0018929	0.04407
66986_298	77667	1387146	0.013803	-1.854	0.7641	-0.0079521	0.043782
67020_136	77667	1465822	0.0078016	-2.1044	0.97638	-0.0012318	0.043914
67080_15	77667	1653355	0.0072014	-2.1394	0.97721	0.00054785	0.04397
67114_32	77667	1698987	0.0096019	-2.0135	0.96762	0.0018086	0.04409
67131_9	77667	1733348	0.0080016	-2.0933	0.97597	-0.0029268	0.043833
67141_30	77667	1757275	0.010002	-1.9955	0.96326	-0.0025164	0.043927
67143_46	77667	1769220	0.0078016	-2.1044	0.97638	0.0024276	0.04407
67155_23	77667	1776858	0.010002	-1.9955	0.96326	-0.0013814	0.043919
67169_60	77667	1814887	0.010202	-1.9869	0.96013	-0.0039901	0.043853
67188_59	77667	1848743	0.010002	-1.9955	0.96326	-0.0019769	0.043932
67197_199	77667	1896404	0.011402	-1.938	0.9297	-0.0031803	0.043864
67222_28	77667	1942245	0.0084017	-2.072	0.97491	-0.0035229	0.043874
67228_61	77667	1952952	0.010002	-1.9955	0.96326	-0.0027849	0.043884
67269_0	77667	2035864	0.0064013	-2.1909	0.97769	-5.38e-05	0.044004
67274_28	77667	2053976	0.011202	-1.9458	0.93712	-0.0071247	0.043762
67331_9	77667	2180075	0.010002	-1.9955	0.96326	-0.0050176	0.043831
67350_58	77667	2232522	0.0082016	-2.0825	0.97547	0.00051684	0.043993
67356_3	77667	2247725	0.010202	-1.9869	0.96013	-0.003593	0.043942
67365_78	77667	2284848	0.011402	-1.938	0.9297	-0.0065093	0.043777
67418_36	77667	2385815	0.0064013	-2.1909	0.97769	-0.0030165	0.04386
67453_82	77667	2479935	0.013603	-1.8604	0.77662	0.0081234	0.044515
67580_178	77667	2770335	0.012202	-1.9082	0.88849	-0.0067921	0.04375
67632_18	77667	2860085	0.012002	-1.9155	0.89977	-0.0074502	0.043713
67725_31	77667	3059940	0.013403	-1.8669	0.7887	-0.0039876	0.043852
67736_90	77667	3121876	0.0094019	-2.0227	0.96924	-0.0039378	0.043884
67751_117	77667	3138985	0.0084017	-2.072	0.97491	-0.004634	0.043826
67775_182	77667	3196331	0.0096019	-2.0135	0.96762	-0.0014969	0.043938
67788_31	77667	3229355	0.0056011	-2.2493	0.97781	-0.0030831	0.043857
67808_89	77667	3268454	0.009802	-2.0044	0.96577	0.0045977	0.044315
67855_2	77667	3386428	0.0092018	-2.0321	0.97074	-0.0018024	0.043892
67893_120	77667	3484168	0.0096019	-2.0135	0.96762	0.00038052	0.044015
67930_9	77668	1860	0.0090018	-2.0417	0.97213	0.0034304	0.044233
67961_17	77668	41455	0.010202	-1.9869	0.96013	0.00087498	0.044037
67964_31	77668	60389	0.010202	-1.9869	0.96013	-0.0022133	0.04391
68012_90	77668	183018	0.0086017	-2.0617	0.97407	-0.0028188	0.043845
68042_10	77668	235902	0.011602	-1.9304	0.92034	0.004278	0.044207
68087_58	77668	334936	0.0080016	-2.0933	0.97597	-0.0013018	0.043869
68096_12	77668	344065	0.028406	-1.5341	0.43349	0.036838	0.046809
68103_12	77668	358523	0.0090018	-2.0417	0.97213	-0.0005616	0.043966
68106_34	77668	360496	0.0086017	-2.0617	0.97407	-0.0033373	0.04385
68108_116	77668	360824	0.0090018	-2.0417	0.97213	0.0035727	0.044177
68181_29	77668	532752	0.0068014	-2.1644	0.97751	0.0006804	0.043985
68204_131	77668	584077	0.011002	-1.9537	0.94359	-0.0043863	0.043835
68253_30	77668	680861	0.0086017	-2.0617	0.97407	-0.0034205	0.043838
68278_31	77668	747197	0.0080016	-2.0933	0.97597	-0.0040586	0.043781
68295_97	77668	793783	0.012603	-1.894	0.856	-0.0049286	0.043827
68389_148	77668	1101868	0.010202	-1.9869	0.96013	-0.0019587	0.0439
68432_44	77668	1235641	0.011602	-1.9304	0.92034	-0.0035262	0.043911
68445_61	77668	1258936	0.0086017	-2.0617	0.97407	-0.0039336	0.043895
68451_46	77668	1268893	0.0080016	-2.0933	0.97597	-0.0017326	0.043902
68456_2	77668	1285345	0.0068014	-2.1644	0.97751	0.0006559	0.043991
68464_86	77668	1308191	0.010202	-1.9869	0.96013	0.0004639	0.043992
68500_72	77668	1388071	0.010202	-1.9869	0.96013	-0.0018419	0.043899
68501_60	77668	1394218	0.010002	-1.9955	0.96326	0.0046025	0.044321
68543_30	77668	1450373	0.010202	-1.9869	0.96013	-0.0031309	0.043879
68572_10	77668	1512079	0.012202	-1.9082	0.88849	0.010932	0.044764
[truncated: 1,661 more rows]
