# Supplementary material
Source: Research Square preprint supplement (doi:10.21203/rs.3.rs-10017901/v1)
Supplement: Supplementary file 7 [file ddfffa17d24a5d6bb2aa61d9.docx]

**Supplementary Figures**

**Figure S1**. Pairwise FST (**a**) and weighted FST (**b**) genetic distances among queen phenotypes across four populations.

**Figure S2**. Cross-validation curve used to determine the optimal number of ancestral populations (K) and population structures for each case. K range: 3–8.

**Figure S3**. Maximum-likelihood phylogenetic trees of 96 queens based on 6,275 genome-wide SNPs. Node support was estimated using 1,000 bootstrap replicates. Bootstrap support values > 70 are indicated at the nodes.

**Figure S4**. Cumulative genome assembly coverage for (**a**) male (reference), (**b**) alate queen, and (**c**) ergatoid queen genome in *M. nipponica.* Scaffolds are ordered from longest to shortest, with N70 length and the corresponding scaffold count indicated.

**Figure S5**. *M. nipponica* scaffolds that putatively constitute a single chromosome together with scaffold_77815. (**a**) Genome alignment between *M. graminicola* chromosomes (Mg1–14) and N70-selected scaffolds of the reference genome. Mg4-aligned scaffolds are highlighted in yellow, including scaffold_77815. (**b**) GWAS Manhattan plot across scaffolds putatively syntenic to Mg4. Scaffolds were anchored to Mg4 via homology-based scaffolding. Two scaffolds lacking filtered RAD-SNPs were excluded. Individual SNP associations are plotted by genomic position and unadjusted statistical significance [–log10(p)]. Red and blue horizontal lines denote conventional genome-wide (*p* = 1 × 10–8) and suggestive (*p* = 1 × 10–5) significance levels. Plots significantly associated with phenotype after Benjamini–Hochberg correction (FDR < 0.05) are highlighted in green.

**Figure S6**. SNP genotypes across four supergene scaffolds in 96 queens. Genotypes are shown as light gray (0/0; homozygous for reference alleles), yellow (0/1; heterozygous), green (1/1; homozygous for alternative alleles), and dark gray (NA).

**Supplementary Tables**

**Table S1**. Genome assembly statistics for *M. nipponica*.

**Table S2**. SNPs associated with queen polymorphism in *M. nipponica*.

**Table S3**. Results of Bayescan outlier analysis.

**Table S4**. Scaffold orders and orientations for the Mg4-syntenic pseudochromosomes.

**Table S5**. DEGs between adult alate and ergatoid queens with annotations. Supergene-located DEGs are shown in bold, with enriched GO terms on supergene scaffolds indicated in red.

**Table S6**. DEGs between pupal alate and ergatoid queens with annotations. Supergene-located DEGs were shown in bold.
