# Supplementary material
Source: Research Square preprint supplement (doi:10.21203/rs.3.rs-10017901/v1)
Supplement: Supplementary file 8 [file e441ca384a9a7495e647e67f.pdf]

# Figure S4

**(a) reference genome (male)**

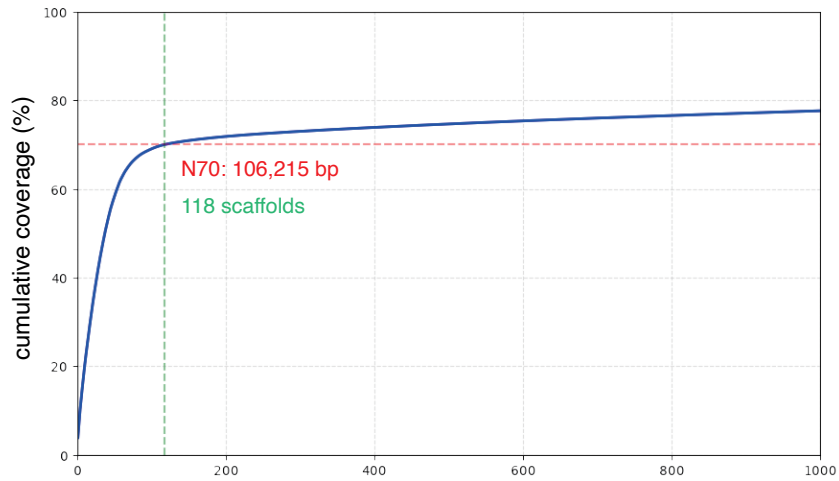

**(b) alate queen genome**

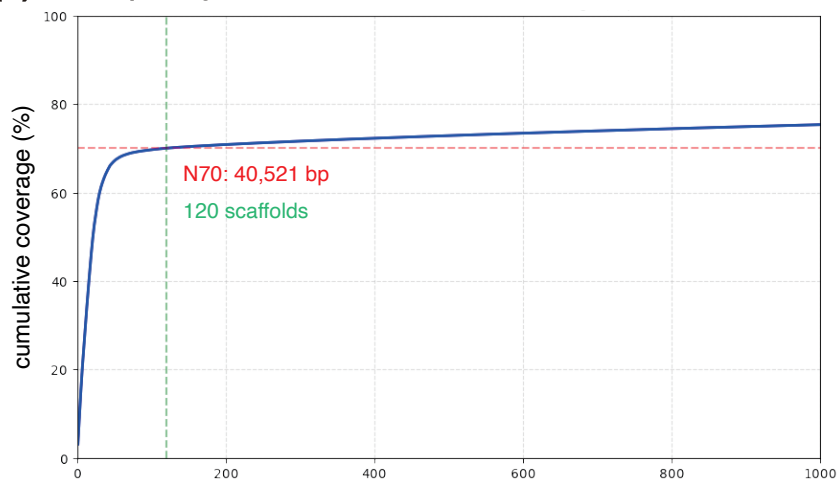

**(c) ergatoid queen genome**

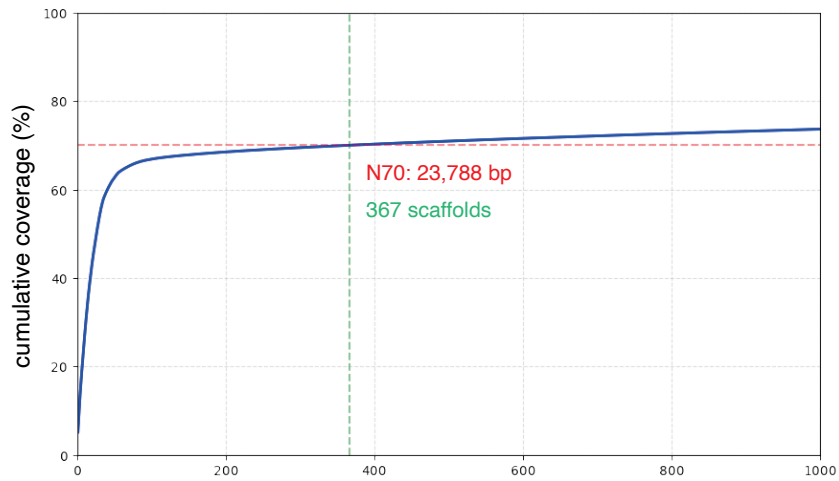

number of scaffolds
