# Supplementary material
Source: Research Square preprint supplement (doi:10.21203/rs.3.rs-10017901/v1)

Figure S6

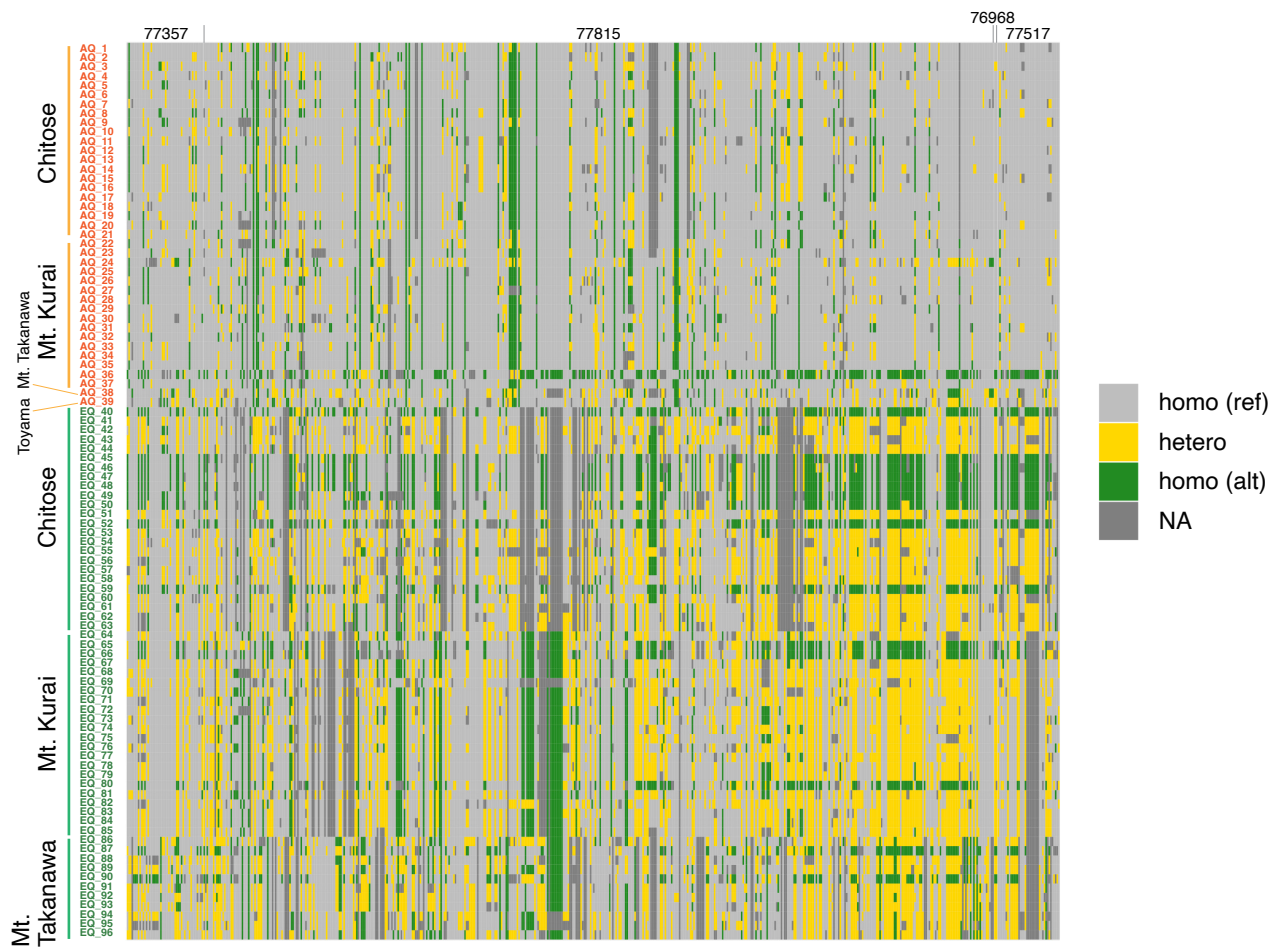

Supplement: Supplementary file 1 [file 12fc05a60f12898f06ef5ce3.pdf]

**Figure S1**

**(a)  $F_{st}$**

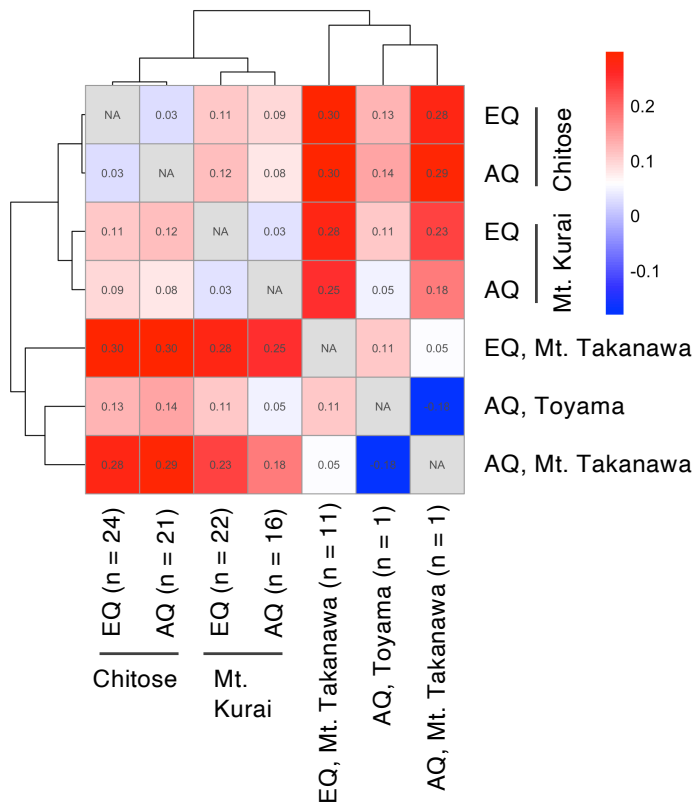

**(b) weighted  $F_{st}$**

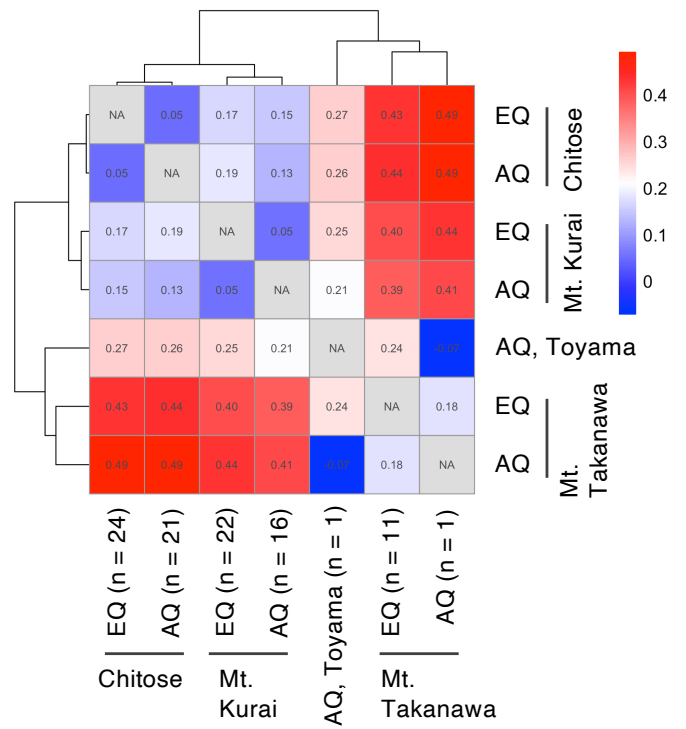

Supplement: Supplementary file 2 [file 51848996e6d55d46dfa7d5d6.pdf]

Figure S2

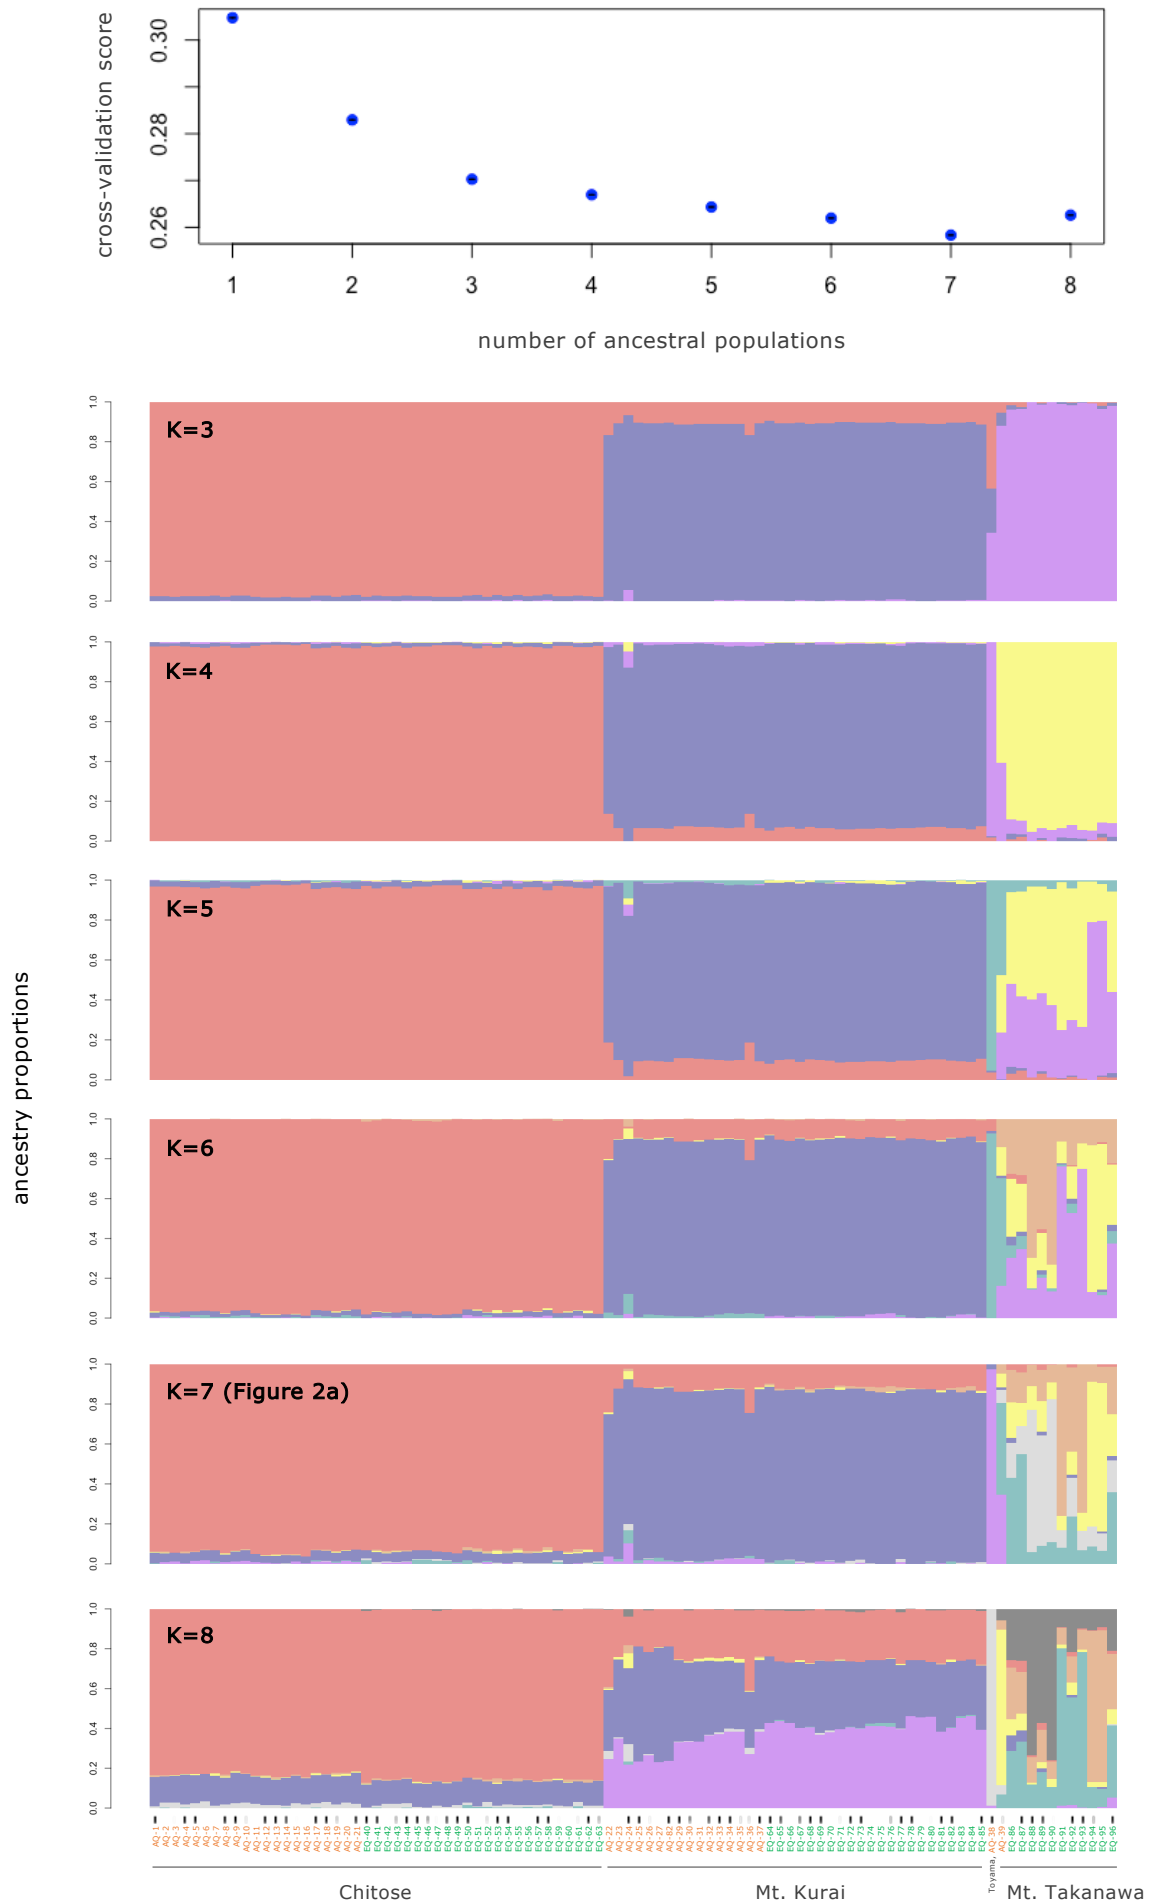

Supplement: Supplementary file 3 [file 583822fd1a41f6b69fabf058.pdf]

**Figure S5**

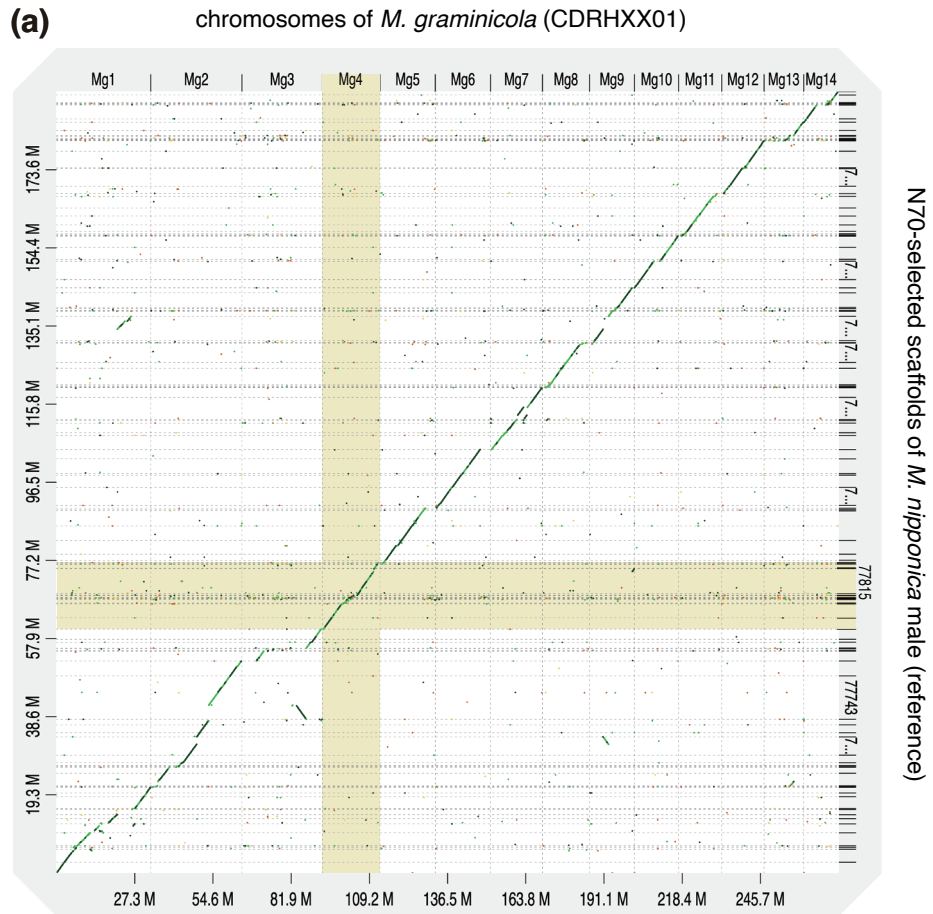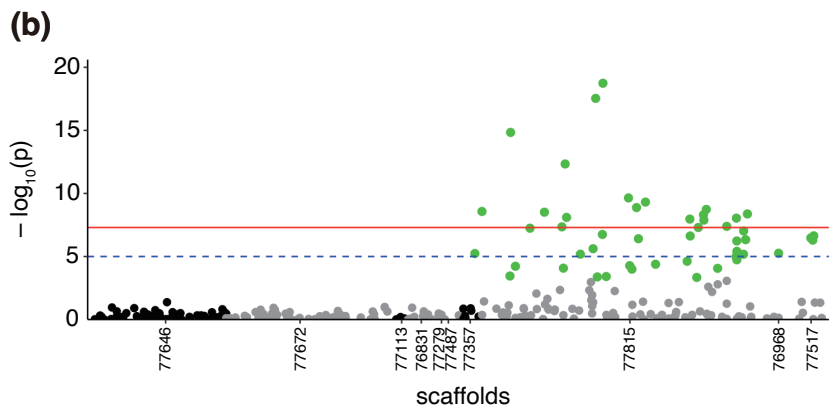

Supplement: Supplementary file 6 [file db9a86691cf5c9eb995b39da.pdf]
